# Supplementary material for: Immune and Stromal Classification of Colorectal Cancer Is Associated with Molecular Subtypes and Relevant for Precision Immunotherapy
Source: Oxford University Press journal article supplement (doi:10.1158/1078-0432.ccr-15-2879), 2016-03-18
Supplement: 10780432ccr152879-sup-158784_2_supp_3389564_r3kcvw.xlsx [file 10780432ccr152879-sup-158784_2_supp_3389564_r3kcvw.xlsx]

## Sheet: S3
Sample_ID	Dataset_ID	Cell Line Name	Primary_Site	Repository	Microarray type
GSM886929	GSE36133	CHP-126	autonomic_ganglia	GEO	GEO:GPL570 (Affymetrix HGU133+2)
GSM886930	GSE36133	CHP-212	autonomic_ganglia	GEO	GEO:GPL570 (Affymetrix HGU133+2)
GSM887162	GSE36133	IMR-32	autonomic_ganglia	GEO	GEO:GPL570 (Affymetrix HGU133+2)
GSM887206	GSE36133	KELLY	autonomic_ganglia	GEO	GEO:GPL570 (Affymetrix HGU133+2)
GSM887239	GSE36133	KP-N-RT-BM-1	autonomic_ganglia	GEO	GEO:GPL570 (Affymetrix HGU133+2)
GSM887240	GSE36133	KP-N-SI9s	autonomic_ganglia	GEO	GEO:GPL570 (Affymetrix HGU133+2)
GSM887241	GSE36133	KP-N-YN	autonomic_ganglia	GEO	GEO:GPL570 (Affymetrix HGU133+2)
GSM887319	GSE36133	MHH-NB-11	autonomic_ganglia	GEO	GEO:GPL570 (Affymetrix HGU133+2)
GSM887348	GSE36133	NB-1	autonomic_ganglia	GEO	GEO:GPL570 (Affymetrix HGU133+2)
GSM887455	GSE36133	NH-6	autonomic_ganglia	GEO	GEO:GPL570 (Affymetrix HGU133+2)
GSM887570	GSE36133	SH-SY5Y	autonomic_ganglia	GEO	GEO:GPL570 (Affymetrix HGU133+2)
GSM887572	GSE36133	SIMA	autonomic_ganglia	GEO	GEO:GPL570 (Affymetrix HGU133+2)
GSM887592	GSE36133	SK-N-AS	autonomic_ganglia	GEO	GEO:GPL570 (Affymetrix HGU133+2)
GSM887593	GSE36133	SK-N-BE(2)	autonomic_ganglia	GEO	GEO:GPL570 (Affymetrix HGU133+2)
GSM887594	GSE36133	SK-N-DZ	autonomic_ganglia	GEO	GEO:GPL570 (Affymetrix HGU133+2)
GSM887595	GSE36133	SK-N-FI	autonomic_ganglia	GEO	GEO:GPL570 (Affymetrix HGU133+2)
GSM887597	GSE36133	SK-N-SH	autonomic_ganglia	GEO	GEO:GPL570 (Affymetrix HGU133+2)
GSM887144	GSE36133	HuCCT1	biliary_tract	GEO	GEO:GPL570 (Affymetrix HGU133+2)
GSM887147	GSE36133	HuH28	biliary_tract	GEO	GEO:GPL570 (Affymetrix HGU133+2)
GSM887605	GSE36133	SNU-1079	biliary_tract	GEO	GEO:GPL570 (Affymetrix HGU133+2)
GSM887607	GSE36133	SNU-1196	biliary_tract	GEO	GEO:GPL570 (Affymetrix HGU133+2)
GSM887618	GSE36133	SNU-245	biliary_tract	GEO	GEO:GPL570 (Affymetrix HGU133+2)
GSM887620	GSE36133	SNU-308	biliary_tract	GEO	GEO:GPL570 (Affymetrix HGU133+2)
GSM887631	GSE36133	SNU-478	biliary_tract	GEO	GEO:GPL570 (Affymetrix HGU133+2)
GSM886836	GSE36133	143B	bone	GEO	GEO:GPL570 (Affymetrix HGU133+2)
GSM886859	GSE36133	A-673	bone	GEO	GEO:GPL570 (Affymetrix HGU133+2)
GSM886901	GSE36133	CADO-ES1	bone	GEO	GEO:GPL570 (Affymetrix HGU133+2)
GSM886912	GSE36133	CAL-78	bone	GEO	GEO:GPL570 (Affymetrix HGU133+2)
GSM887015	GSE36133	G-292, clone A141B1	bone	GEO	GEO:GPL570 (Affymetrix HGU133+2)
GSM887088	GSE36133	HOS	bone	GEO	GEO:GPL570 (Affymetrix HGU133+2)
GSM887110	GSE36133	Hs 706.T	bone	GEO	GEO:GPL570 (Affymetrix HGU133+2)
GSM887112	GSE36133	Hs 737.T	bone	GEO	GEO:GPL570 (Affymetrix HGU133+2)
GSM887118	GSE36133	Hs 819.T	bone	GEO	GEO:GPL570 (Affymetrix HGU133+2)
GSM887119	GSE36133	Hs 821.T	bone	GEO	GEO:GPL570 (Affymetrix HGU133+2)
GSM887120	GSE36133	Hs 822.T	bone	GEO	GEO:GPL570 (Affymetrix HGU133+2)
GSM887124	GSE36133	Hs 863.T	bone	GEO	GEO:GPL570 (Affymetrix HGU133+2)
GSM887125	GSE36133	Hs 870.T	bone	GEO	GEO:GPL570 (Affymetrix HGU133+2)
GSM887126	GSE36133	Hs 888.T	bone	GEO	GEO:GPL570 (Affymetrix HGU133+2)
GSM887314	GSE36133	MG-63	bone	GEO	GEO:GPL570 (Affymetrix HGU133+2)
GSM887318	GSE36133	MHH-ES-1	bone	GEO	GEO:GPL570 (Affymetrix HGU133+2)
GSM887480	GSE36133	OUMS-27	bone	GEO	GEO:GPL570 (Affymetrix HGU133+2)
GSM887527	GSE36133	RD-ES	bone	GEO	GEO:GPL570 (Affymetrix HGU133+2)
GSM887574	GSE36133	SJSA-1	bone	GEO	GEO:GPL570 (Affymetrix HGU133+2)
GSM887577	GSE36133	SK-ES-1	bone	GEO	GEO:GPL570 (Affymetrix HGU133+2)
GSM887596	GSE36133	SK-N-MC	bone	GEO	GEO:GPL570 (Affymetrix HGU133+2)
GSM887666	GSE36133	SW 1353	bone	GEO	GEO:GPL570 (Affymetrix HGU133+2)
GSM887682	GSE36133	T1-73	bone	GEO	GEO:GPL570 (Affymetrix HGU133+2)
GSM887689	GSE36133	TC-71	bone	GEO	GEO:GPL570 (Affymetrix HGU133+2)
GSM887722	GSE36133	U-2 OS	bone	GEO	GEO:GPL570 (Affymetrix HGU133+2)
GSM886871	GSE36133	AU565	breast	GEO	GEO:GPL570 (Affymetrix HGU133+2)
GSM886891	GSE36133	BT-20	breast	GEO	GEO:GPL570 (Affymetrix HGU133+2)
GSM886892	GSE36133	BT-474	breast	GEO	GEO:GPL570 (Affymetrix HGU133+2)
GSM886893	GSE36133	BT-483	breast	GEO	GEO:GPL570 (Affymetrix HGU133+2)
GSM886894	GSE36133	BT-549	breast	GEO	GEO:GPL570 (Affymetrix HGU133+2)
GSM886904	GSE36133	CAL-120	breast	GEO	GEO:GPL570 (Affymetrix HGU133+2)
GSM886906	GSE36133	CAL-148	breast	GEO	GEO:GPL570 (Affymetrix HGU133+2)
GSM886909	GSE36133	CAL-51	breast	GEO	GEO:GPL570 (Affymetrix HGU133+2)
GSM886913	GSE36133	CAL-85-1	breast	GEO	GEO:GPL570 (Affymetrix HGU133+2)
GSM886917	GSE36133	CAMA-1	breast	GEO	GEO:GPL570 (Affymetrix HGU133+2)
GSM886989	GSE36133	DU4475	breast	GEO	GEO:GPL570 (Affymetrix HGU133+2)
GSM886998	GSE36133	EFM-192A	breast	GEO	GEO:GPL570 (Affymetrix HGU133+2)
GSM886999	GSE36133	EFM-19	breast	GEO	GEO:GPL570 (Affymetrix HGU133+2)
GSM887033	GSE36133	HCC1143	breast	GEO	GEO:GPL570 (Affymetrix HGU133+2)
GSM887035	GSE36133	HCC1187	breast	GEO	GEO:GPL570 (Affymetrix HGU133+2)
GSM887037	GSE36133	HCC1395	breast	GEO	GEO:GPL570 (Affymetrix HGU133+2)
GSM887038	GSE36133	HCC1419	breast	GEO	GEO:GPL570 (Affymetrix HGU133+2)
GSM887039	GSE36133	HCC1428	breast	GEO	GEO:GPL570 (Affymetrix HGU133+2)
GSM887040	GSE36133	HCC1500	breast	GEO	GEO:GPL570 (Affymetrix HGU133+2)
GSM887041	GSE36133	HCC1569	breast	GEO	GEO:GPL570 (Affymetrix HGU133+2)
GSM887042	GSE36133	HCC1599	breast	GEO	GEO:GPL570 (Affymetrix HGU133+2)
GSM887044	GSE36133	HCC1806	breast	GEO	GEO:GPL570 (Affymetrix HGU133+2)
GSM887045	GSE36133	HCC1937	breast	GEO	GEO:GPL570 (Affymetrix HGU133+2)
GSM887046	GSE36133	HCC1954	breast	GEO	GEO:GPL570 (Affymetrix HGU133+2)
GSM887047	GSE36133	HCC202	breast	GEO	GEO:GPL570 (Affymetrix HGU133+2)
GSM887048	GSE36133	HCC2157	breast	GEO	GEO:GPL570 (Affymetrix HGU133+2)
GSM887049	GSE36133	HCC2218	breast	GEO	GEO:GPL570 (Affymetrix HGU133+2)
GSM887054	GSE36133	HCC38	breast	GEO	GEO:GPL570 (Affymetrix HGU133+2)
GSM887058	GSE36133	HCC70	breast	GEO	GEO:GPL570 (Affymetrix HGU133+2)
GSM887066	GSE36133	HDQ-P1	breast	GEO	GEO:GPL570 (Affymetrix HGU133+2)
GSM887094	GSE36133	Hs 274.T	breast	GEO	GEO:GPL570 (Affymetrix HGU133+2)
GSM887095	GSE36133	Hs 281.T	breast	GEO	GEO:GPL570 (Affymetrix HGU133+2)
GSM887097	GSE36133	Hs 343.T	breast	GEO	GEO:GPL570 (Affymetrix HGU133+2)
GSM887098	GSE36133	Hs 578T	breast	GEO	GEO:GPL570 (Affymetrix HGU133+2)
GSM887101	GSE36133	Hs 606.T	breast	GEO	GEO:GPL570 (Affymetrix HGU133+2)
GSM887113	GSE36133	Hs 739.T	breast	GEO	GEO:GPL570 (Affymetrix HGU133+2)
GSM887114	GSE36133	Hs 742.T	breast	GEO	GEO:GPL570 (Affymetrix HGU133+2)
GSM887183	GSE36133	JIMT-1	breast	GEO	GEO:GPL570 (Affymetrix HGU133+2)
GSM887238	GSE36133	KPL-1	breast	GEO	GEO:GPL570 (Affymetrix HGU133+2)
GSM887291	GSE36133	MCF7	breast	GEO	GEO:GPL570 (Affymetrix HGU133+2)
GSM887292	GSE36133	MDA-MB-134-VI	breast	GEO	GEO:GPL570 (Affymetrix HGU133+2)
GSM887293	GSE36133	MDA-MB-157	breast	GEO	GEO:GPL570 (Affymetrix HGU133+2)
GSM887294	GSE36133	MDA-MB-175-VII	breast	GEO	GEO:GPL570 (Affymetrix HGU133+2)
GSM887295	GSE36133	MDA-MB-231	breast	GEO	GEO:GPL570 (Affymetrix HGU133+2)
GSM887296	GSE36133	MDA-MB-361	breast	GEO	GEO:GPL570 (Affymetrix HGU133+2)
GSM887297	GSE36133	MDA-MB-415	breast	GEO	GEO:GPL570 (Affymetrix HGU133+2)
GSM887299	GSE36133	MDA-MB-436	breast	GEO	GEO:GPL570 (Affymetrix HGU133+2)
GSM887300	GSE36133	MDA-MB-453	breast	GEO	GEO:GPL570 (Affymetrix HGU133+2)
GSM887301	GSE36133	MDA-MB-468	breast	GEO	GEO:GPL570 (Affymetrix HGU133+2)
GSM887575	GSE36133	SK-BR-3	breast	GEO	GEO:GPL570 (Affymetrix HGU133+2)
GSM887685	GSE36133	T-47D	breast	GEO	GEO:GPL570 (Affymetrix HGU133+2)
GSM887727	GSE36133	UACC-812	breast	GEO	GEO:GPL570 (Affymetrix HGU133+2)
GSM887728	GSE36133	UACC-893	breast	GEO	GEO:GPL570 (Affymetrix HGU133+2)
GSM887749	GSE36133	YMB-1	breast	GEO	GEO:GPL570 (Affymetrix HGU133+2)
GSM887750	GSE36133	ZR-75-1	breast	GEO	GEO:GPL570 (Affymetrix HGU133+2)
GSM887751	GSE36133	ZR-75-30	breast	GEO	GEO:GPL570 (Affymetrix HGU133+2)
GSM886835	GSE36133	1321N1	central_nervous_system	GEO	GEO:GPL570 (Affymetrix HGU133+2)
GSM886839	GSE36133	42-MG-BA	central_nervous_system	GEO	GEO:GPL570 (Affymetrix HGU133+2)
GSM886848	GSE36133	8-MG-BA	central_nervous_system	GEO	GEO:GPL570 (Affymetrix HGU133+2)
GSM886850	GSE36133	A172	central_nervous_system	GEO	GEO:GPL570 (Affymetrix HGU133+2)
GSM886866	GSE36133	AM-38	central_nervous_system	GEO	GEO:GPL570 (Affymetrix HGU133+2)
GSM886877	GSE36133	Becker	central_nervous_system	GEO	GEO:GPL570 (Affymetrix HGU133+2)
GSM886922	GSE36133	CAS-1	central_nervous_system	GEO	GEO:GPL570 (Affymetrix HGU133+2)
GSM886923	GSE36133	CCF-STTG1	central_nervous_system	GEO	GEO:GPL570 (Affymetrix HGU133+2)
GSM886969	GSE36133	D283 Med	central_nervous_system	GEO	GEO:GPL570 (Affymetrix HGU133+2)
GSM886970	GSE36133	D341 Med	central_nervous_system	GEO	GEO:GPL570 (Affymetrix HGU133+2)
GSM886972	GSE36133	Daoy	central_nervous_system	GEO	GEO:GPL570 (Affymetrix HGU133+2)
GSM886974	GSE36133	DBTRG-05MG	central_nervous_system	GEO	GEO:GPL570 (Affymetrix HGU133+2)
GSM886978	GSE36133	DK-MG	central_nervous_system	GEO	GEO:GPL570 (Affymetrix HGU133+2)
GSM887020	GSE36133	GAMG	central_nervous_system	GEO	GEO:GPL570 (Affymetrix HGU133+2)
GSM887024	GSE36133	GI-1	central_nervous_system	GEO	GEO:GPL570 (Affymetrix HGU133+2)
GSM887025	GSE36133	GMS-10	central_nervous_system	GEO	GEO:GPL570 (Affymetrix HGU133+2)
GSM887026	GSE36133	GOS-3	central_nervous_system	GEO	GEO:GPL570 (Affymetrix HGU133+2)
GSM887031	GSE36133	H4	central_nervous_system	GEO	GEO:GPL570 (Affymetrix HGU133+2)
GSM887106	GSE36133	Hs 683	central_nervous_system	GEO	GEO:GPL570 (Affymetrix HGU133+2)
GSM887194	GSE36133	KALS-1	central_nervous_system	GEO	GEO:GPL570 (Affymetrix HGU133+2)
GSM887207	GSE36133	KG-1-C	central_nervous_system	GEO	GEO:GPL570 (Affymetrix HGU133+2)
GSM887229	GSE36133	KNS-42	central_nervous_system	GEO	GEO:GPL570 (Affymetrix HGU133+2)
GSM887230	GSE36133	KNS-60	central_nervous_system	GEO	GEO:GPL570 (Affymetrix HGU133+2)
GSM887232	GSE36133	KNS-81	central_nervous_system	GEO	GEO:GPL570 (Affymetrix HGU133+2)
GSM887242	GSE36133	KS-1	central_nervous_system	GEO	GEO:GPL570 (Affymetrix HGU133+2)
GSM887269	GSE36133	LN-18	central_nervous_system	GEO	GEO:GPL570 (Affymetrix HGU133+2)
GSM887270	GSE36133	LN-229	central_nervous_system	GEO	GEO:GPL570 (Affymetrix HGU133+2)
GSM887286	GSE36133	M059K	central_nervous_system	GEO	GEO:GPL570 (Affymetrix HGU133+2)
GSM887457	GSE36133	NMC-G1	central_nervous_system	GEO	GEO:GPL570 (Affymetrix HGU133+2)
GSM887477	GSE36133	ONS-76	central_nervous_system	GEO	GEO:GPL570 (Affymetrix HGU133+2)
GSM887565	GSE36133	SF126	central_nervous_system	GEO	GEO:GPL570 (Affymetrix HGU133+2)
GSM887566	GSE36133	SF-295	central_nervous_system	GEO	GEO:GPL570 (Affymetrix HGU133+2)
GSM887600	GSE36133	SNB-19	central_nervous_system	GEO	GEO:GPL570 (Affymetrix HGU133+2)
GSM887606	GSE36133	SNU-1105	central_nervous_system	GEO	GEO:GPL570 (Affymetrix HGU133+2)
GSM887615	GSE36133	SNU-201	central_nervous_system	GEO	GEO:GPL570 (Affymetrix HGU133+2)
GSM887628	GSE36133	SNU-466	central_nervous_system	GEO	GEO:GPL570 (Affymetrix HGU133+2)
GSM887637	GSE36133	SNU-626	central_nervous_system	GEO	GEO:GPL570 (Affymetrix HGU133+2)
GSM887638	GSE36133	SNU-738	central_nervous_system	GEO	GEO:GPL570 (Affymetrix HGU133+2)
GSM887663	GSE36133	SW 1088	central_nervous_system	GEO	GEO:GPL570 (Affymetrix HGU133+2)
GSM887671	GSE36133	SW 1783	central_nervous_system	GEO	GEO:GPL570 (Affymetrix HGU133+2)
GSM887687	GSE36133	T98G	central_nervous_system	GEO	GEO:GPL570 (Affymetrix HGU133+2)
GSM887707	GSE36133	TM-31	central_nervous_system	GEO	GEO:GPL570 (Affymetrix HGU133+2)
GSM887719	GSE36133	U-138 MG	central_nervous_system	GEO	GEO:GPL570 (Affymetrix HGU133+2)
GSM887720	GSE36133	U-251 MG	central_nervous_system	GEO	GEO:GPL570 (Affymetrix HGU133+2)
GSM887723	GSE36133	U-87 MG	central_nervous_system	GEO	GEO:GPL570 (Affymetrix HGU133+2)
GSM887747	GSE36133	YH-13	central_nervous_system	GEO	GEO:GPL570 (Affymetrix HGU133+2)
GSM887748	GSE36133	YKG1	central_nervous_system	GEO	GEO:GPL570 (Affymetrix HGU133+2)
GSM886869	GSE36133	AN3 CA	endometrium	GEO	GEO:GPL570 (Affymetrix HGU133+2)
GSM886997	GSE36133	EFE-184	endometrium	GEO	GEO:GPL570 (Affymetrix HGU133+2)
GSM887005	GSE36133	EN	endometrium	GEO	GEO:GPL570 (Affymetrix HGU133+2)
GSM887009	GSE36133	ESS-1	endometrium	GEO	GEO:GPL570 (Affymetrix HGU133+2)
GSM887067	GSE36133	HEC-108	endometrium	GEO	GEO:GPL570 (Affymetrix HGU133+2)
GSM887068	GSE36133	HEC-151	endometrium	GEO	GEO:GPL570 (Affymetrix HGU133+2)
GSM887069	GSE36133	HEC-1-A	endometrium	GEO	GEO:GPL570 (Affymetrix HGU133+2)
GSM887070	GSE36133	HEC-1-B	endometrium	GEO	GEO:GPL570 (Affymetrix HGU133+2)
GSM887071	GSE36133	HEC-251	endometrium	GEO	GEO:GPL570 (Affymetrix HGU133+2)
GSM887072	GSE36133	HEC-265	endometrium	GEO	GEO:GPL570 (Affymetrix HGU133+2)
GSM887073	GSE36133	HEC-50B	endometrium	GEO	GEO:GPL570 (Affymetrix HGU133+2)
GSM887074	GSE36133	HEC-59	endometrium	GEO	GEO:GPL570 (Affymetrix HGU133+2)
GSM887075	GSE36133	HEC-6	endometrium	GEO	GEO:GPL570 (Affymetrix HGU133+2)
GSM887164	GSE36133	Ishikawa (Heraklio) 02 ER-	endometrium	GEO	GEO:GPL570 (Affymetrix HGU133+2)
GSM887180	GSE36133	JHUEM-1	endometrium	GEO	GEO:GPL570 (Affymetrix HGU133+2)
GSM887181	GSE36133	JHUEM-2	endometrium	GEO	GEO:GPL570 (Affymetrix HGU133+2)
GSM887182	GSE36133	JHUEM-3	endometrium	GEO	GEO:GPL570 (Affymetrix HGU133+2)
GSM887211	GSE36133	KLE	endometrium	GEO	GEO:GPL570 (Affymetrix HGU133+2)
GSM887311	GSE36133	MFE-280	endometrium	GEO	GEO:GPL570 (Affymetrix HGU133+2)
GSM887312	GSE36133	MFE-296	endometrium	GEO	GEO:GPL570 (Affymetrix HGU133+2)
GSM887313	GSE36133	MFE-319	endometrium	GEO	GEO:GPL570 (Affymetrix HGU133+2)
GSM887542	GSE36133	RL95-2	endometrium	GEO	GEO:GPL570 (Affymetrix HGU133+2)
GSM887601	GSE36133	SNG-M	endometrium	GEO	GEO:GPL570 (Affymetrix HGU133+2)
GSM887604	GSE36133	SNU-1077	endometrium	GEO	GEO:GPL570 (Affymetrix HGU133+2)
GSM887703	GSE36133	TEN	endometrium	GEO	GEO:GPL570 (Affymetrix HGU133+2)
GSM886843	GSE36133	697	haematopoietic_and_lymphoid_tissue	GEO	GEO:GPL570 (Affymetrix HGU133+2)
GSM886855	GSE36133	A3/KAW	haematopoietic_and_lymphoid_tissue	GEO	GEO:GPL570 (Affymetrix HGU133+2)
GSM886857	GSE36133	A4/Fuk	haematopoietic_and_lymphoid_tissue	GEO	GEO:GPL570 (Affymetrix HGU133+2)
GSM886867	GSE36133	AML-193	haematopoietic_and_lymphoid_tissue	GEO	GEO:GPL570 (Affymetrix HGU133+2)
GSM886868	GSE36133	AMO-1	haematopoietic_and_lymphoid_tissue	GEO	GEO:GPL570 (Affymetrix HGU133+2)
GSM886874	GSE36133	BCP-1	haematopoietic_and_lymphoid_tissue	GEO	GEO:GPL570 (Affymetrix HGU133+2)
GSM886876	GSE36133	BDCM	haematopoietic_and_lymphoid_tissue	GEO	GEO:GPL570 (Affymetrix HGU133+2)
GSM886889	GSE36133	BL-41	haematopoietic_and_lymphoid_tissue	GEO	GEO:GPL570 (Affymetrix HGU133+2)
GSM886890	GSE36133	BL-70	haematopoietic_and_lymphoid_tissue	GEO	GEO:GPL570 (Affymetrix HGU133+2)
GSM886895	GSE36133	BV-173	haematopoietic_and_lymphoid_tissue	GEO	GEO:GPL570 (Affymetrix HGU133+2)
GSM886900	GSE36133	CA46	haematopoietic_and_lymphoid_tissue	GEO	GEO:GPL570 (Affymetrix HGU133+2)
GSM886931	GSE36133	CI-1	haematopoietic_and_lymphoid_tissue	GEO	GEO:GPL570 (Affymetrix HGU133+2)
GSM886937	GSE36133	CMK-11-5	haematopoietic_and_lymphoid_tissue	GEO	GEO:GPL570 (Affymetrix HGU133+2)
GSM886938	GSE36133	CMK	haematopoietic_and_lymphoid_tissue	GEO	GEO:GPL570 (Affymetrix HGU133+2)
GSM886939	GSE36133	CML-T1	haematopoietic_and_lymphoid_tissue	GEO	GEO:GPL570 (Affymetrix HGU133+2)
GSM886973	GSE36133	Daudi	haematopoietic_and_lymphoid_tissue	GEO	GEO:GPL570 (Affymetrix HGU133+2)
GSM886975	GSE36133	DB	haematopoietic_and_lymphoid_tissue	GEO	GEO:GPL570 (Affymetrix HGU133+2)
GSM886976	GSE36133	DEL	haematopoietic_and_lymphoid_tissue	GEO	GEO:GPL570 (Affymetrix HGU133+2)
GSM886986	GSE36133	DND-41	haematopoietic_and_lymphoid_tissue	GEO	GEO:GPL570 (Affymetrix HGU133+2)
GSM886987	GSE36133	DOHH-2	haematopoietic_and_lymphoid_tissue	GEO	GEO:GPL570 (Affymetrix HGU133+2)
GSM886991	GSE36133	EB1	haematopoietic_and_lymphoid_tissue	GEO	GEO:GPL570 (Affymetrix HGU133+2)
GSM886992	GSE36133	EB2	haematopoietic_and_lymphoid_tissue	GEO	GEO:GPL570 (Affymetrix HGU133+2)
GSM887002	GSE36133	EHEB	haematopoietic_and_lymphoid_tissue	GEO	GEO:GPL570 (Affymetrix HGU133+2)
GSM887003	GSE36133	EJM	haematopoietic_and_lymphoid_tissue	GEO	GEO:GPL570 (Affymetrix HGU133+2)
GSM887004	GSE36133	EM-2	haematopoietic_and_lymphoid_tissue	GEO	GEO:GPL570 (Affymetrix HGU133+2)
GSM887006	GSE36133	EOL-1	haematopoietic_and_lymphoid_tissue	GEO	GEO:GPL570 (Affymetrix HGU133+2)
GSM887010	GSE36133	F-36P	haematopoietic_and_lymphoid_tissue	GEO	GEO:GPL570 (Affymetrix HGU133+2)
GSM887019	GSE36133	GA-10	haematopoietic_and_lymphoid_tissue	GEO	GEO:GPL570 (Affymetrix HGU133+2)
GSM887023	GSE36133	GDM-1	haematopoietic_and_lymphoid_tissue	GEO	GEO:GPL570 (Affymetrix HGU133+2)
GSM887028	GSE36133	GRANTA-519	haematopoietic_and_lymphoid_tissue	GEO	GEO:GPL570 (Affymetrix HGU133+2)
GSM887064	GSE36133	HDLM-2	haematopoietic_and_lymphoid_tissue	GEO	GEO:GPL570 (Affymetrix HGU133+2)
GSM887065	GSE36133	HD-MY-Z	haematopoietic_and_lymphoid_tissue	GEO	GEO:GPL570 (Affymetrix HGU133+2)
GSM887076	GSE36133	HEL 92.1.7	haematopoietic_and_lymphoid_tissue	GEO	GEO:GPL570 (Affymetrix HGU133+2)
GSM887077	GSE36133	HEL	haematopoietic_and_lymphoid_tissue	GEO	GEO:GPL570 (Affymetrix HGU133+2)
GSM887082	GSE36133	HH	haematopoietic_and_lymphoid_tissue	GEO	GEO:GPL570 (Affymetrix HGU133+2)
GSM887083	GSE36133	HL-60	haematopoietic_and_lymphoid_tissue	GEO	GEO:GPL570 (Affymetrix HGU133+2)
GSM887091	GSE36133	HPB-ALL	haematopoietic_and_lymphoid_tissue	GEO	GEO:GPL570 (Affymetrix HGU133+2)
GSM887100	GSE36133	Hs 604.T	haematopoietic_and_lymphoid_tissue	GEO	GEO:GPL570 (Affymetrix HGU133+2)
GSM887102	GSE36133	Hs 611.T	haematopoietic_and_lymphoid_tissue	GEO	GEO:GPL570 (Affymetrix HGU133+2)
GSM887103	GSE36133	Hs 616.T	haematopoietic_and_lymphoid_tissue	GEO	GEO:GPL570 (Affymetrix HGU133+2)
GSM887116	GSE36133	Hs 751.T	haematopoietic_and_lymphoid_tissue	GEO	GEO:GPL570 (Affymetrix HGU133+2)
GSM887143	GSE36133	HT	haematopoietic_and_lymphoid_tissue	GEO	GEO:GPL570 (Affymetrix HGU133+2)
GSM887150	GSE36133	HuNS1	haematopoietic_and_lymphoid_tissue	GEO	GEO:GPL570 (Affymetrix HGU133+2)
GSM887153	GSE36133	HuT 102	haematopoietic_and_lymphoid_tissue	GEO	GEO:GPL570 (Affymetrix HGU133+2)
GSM887154	GSE36133	HuT 78	haematopoietic_and_lymphoid_tissue	GEO	GEO:GPL570 (Affymetrix HGU133+2)
GSM887168	GSE36133	JeKo-1	haematopoietic_and_lymphoid_tissue	GEO	GEO:GPL570 (Affymetrix HGU133+2)
GSM887184	GSE36133	JK-1	haematopoietic_and_lymphoid_tissue	GEO	GEO:GPL570 (Affymetrix HGU133+2)
GSM887186	GSE36133	JM1	haematopoietic_and_lymphoid_tissue	GEO	GEO:GPL570 (Affymetrix HGU133+2)
GSM887188	GSE36133	JURKAT	haematopoietic_and_lymphoid_tissue	GEO	GEO:GPL570 (Affymetrix HGU133+2)
GSM887189	GSE36133	JURL-MK1	haematopoietic_and_lymphoid_tissue	GEO	GEO:GPL570 (Affymetrix HGU133+2)
GSM887190	GSE36133	JVM-2	haematopoietic_and_lymphoid_tissue	GEO	GEO:GPL570 (Affymetrix HGU133+2)
GSM887191	GSE36133	JVM-3	haematopoietic_and_lymphoid_tissue	GEO	GEO:GPL570 (Affymetrix HGU133+2)
GSM887193	GSE36133	K-562	haematopoietic_and_lymphoid_tissue	GEO	GEO:GPL570 (Affymetrix HGU133+2)
GSM887195	GSE36133	KARPAS-299	haematopoietic_and_lymphoid_tissue	GEO	GEO:GPL570 (Affymetrix HGU133+2)
GSM887196	GSE36133	KARPAS-620	haematopoietic_and_lymphoid_tissue	GEO	GEO:GPL570 (Affymetrix HGU133+2)
GSM887197	GSE36133	KASUMI-1	haematopoietic_and_lymphoid_tissue	GEO	GEO:GPL570 (Affymetrix HGU133+2)
GSM887198	GSE36133	KASUMI-2	haematopoietic_and_lymphoid_tissue	GEO	GEO:GPL570 (Affymetrix HGU133+2)
GSM887199	GSE36133	Kasumi-6	haematopoietic_and_lymphoid_tissue	GEO	GEO:GPL570 (Affymetrix HGU133+2)
GSM887202	GSE36133	KCL-22	haematopoietic_and_lymphoid_tissue	GEO	GEO:GPL570 (Affymetrix HGU133+2)
GSM887203	GSE36133	KE-37	haematopoietic_and_lymphoid_tissue	GEO	GEO:GPL570 (Affymetrix HGU133+2)
GSM887205	GSE36133	KE-97	haematopoietic_and_lymphoid_tissue	GEO	GEO:GPL570 (Affymetrix HGU133+2)
GSM887208	GSE36133	KG-1	haematopoietic_and_lymphoid_tissue	GEO	GEO:GPL570 (Affymetrix HGU133+2)
GSM887209	GSE36133	KHM-1B	haematopoietic_and_lymphoid_tissue	GEO	GEO:GPL570 (Affymetrix HGU133+2)
GSM887210	GSE36133	Ki-JK	haematopoietic_and_lymphoid_tissue	GEO	GEO:GPL570 (Affymetrix HGU133+2)
GSM887214	GSE36133	KM-H2	haematopoietic_and_lymphoid_tissue	GEO	GEO:GPL570 (Affymetrix HGU133+2)
GSM887215	GSE36133	KMM-1	haematopoietic_and_lymphoid_tissue	GEO	GEO:GPL570 (Affymetrix HGU133+2)
GSM887220	GSE36133	KMS-11	haematopoietic_and_lymphoid_tissue	GEO	GEO:GPL570 (Affymetrix HGU133+2)
GSM887221	GSE36133	KMS-12-BM	haematopoietic_and_lymphoid_tissue	GEO	GEO:GPL570 (Affymetrix HGU133+2)
GSM887222	GSE36133	KMS-18	haematopoietic_and_lymphoid_tissue	GEO	GEO:GPL570 (Affymetrix HGU133+2)
GSM887223	GSE36133	KMS-20	haematopoietic_and_lymphoid_tissue	GEO	GEO:GPL570 (Affymetrix HGU133+2)
GSM887224	GSE36133	KMS-21BM	haematopoietic_and_lymphoid_tissue	GEO	GEO:GPL570 (Affymetrix HGU133+2)
GSM887225	GSE36133	KMS-26	haematopoietic_and_lymphoid_tissue	GEO	GEO:GPL570 (Affymetrix HGU133+2)
GSM887226	GSE36133	KMS-27	haematopoietic_and_lymphoid_tissue	GEO	GEO:GPL570 (Affymetrix HGU133+2)
GSM887227	GSE36133	KMS-28BM	haematopoietic_and_lymphoid_tissue	GEO	GEO:GPL570 (Affymetrix HGU133+2)
GSM887228	GSE36133	KMS-34	haematopoietic_and_lymphoid_tissue	GEO	GEO:GPL570 (Affymetrix HGU133+2)
GSM887233	GSE36133	KO52	haematopoietic_and_lymphoid_tissue	GEO	GEO:GPL570 (Affymetrix HGU133+2)
GSM887234	GSE36133	KOPN-8	haematopoietic_and_lymphoid_tissue	GEO	GEO:GPL570 (Affymetrix HGU133+2)
GSM887244	GSE36133	KU812	haematopoietic_and_lymphoid_tissue	GEO	GEO:GPL570 (Affymetrix HGU133+2)
GSM887246	GSE36133	KYO-1	haematopoietic_and_lymphoid_tissue	GEO	GEO:GPL570 (Affymetrix HGU133+2)
GSM887257	GSE36133	L-1236	haematopoietic_and_lymphoid_tissue	GEO	GEO:GPL570 (Affymetrix HGU133+2)
GSM887259	GSE36133	L-363	haematopoietic_and_lymphoid_tissue	GEO	GEO:GPL570 (Affymetrix HGU133+2)
GSM887260	GSE36133	L-428	haematopoietic_and_lymphoid_tissue	GEO	GEO:GPL570 (Affymetrix HGU133+2)
GSM887261	GSE36133	L-540	haematopoietic_and_lymphoid_tissue	GEO	GEO:GPL570 (Affymetrix HGU133+2)
GSM887262	GSE36133	LAMA-84	haematopoietic_and_lymphoid_tissue	GEO	GEO:GPL570 (Affymetrix HGU133+2)
GSM887272	GSE36133	Loucy	haematopoietic_and_lymphoid_tissue	GEO	GEO:GPL570 (Affymetrix HGU133+2)
GSM887276	GSE36133	LP-1	haematopoietic_and_lymphoid_tissue	GEO	GEO:GPL570 (Affymetrix HGU133+2)
GSM887287	GSE36133	M-07e	haematopoietic_and_lymphoid_tissue	GEO	GEO:GPL570 (Affymetrix HGU133+2)
GSM887289	GSE36133	MC116	haematopoietic_and_lymphoid_tissue	GEO	GEO:GPL570 (Affymetrix HGU133+2)
GSM887304	GSE36133	ME-1	haematopoietic_and_lymphoid_tissue	GEO	GEO:GPL570 (Affymetrix HGU133+2)
GSM887305	GSE36133	MEC-1	haematopoietic_and_lymphoid_tissue	GEO	GEO:GPL570 (Affymetrix HGU133+2)
GSM887306	GSE36133	MEC-2	haematopoietic_and_lymphoid_tissue	GEO	GEO:GPL570 (Affymetrix HGU133+2)
GSM887307	GSE36133	MEG-01	haematopoietic_and_lymphoid_tissue	GEO	GEO:GPL570 (Affymetrix HGU133+2)
GSM887315	GSE36133	MHH-CALL-2	haematopoietic_and_lymphoid_tissue	GEO	GEO:GPL570 (Affymetrix HGU133+2)
GSM887316	GSE36133	MHH-CALL-3	haematopoietic_and_lymphoid_tissue	GEO	GEO:GPL570 (Affymetrix HGU133+2)
GSM887317	GSE36133	MHH-CALL-4	haematopoietic_and_lymphoid_tissue	GEO	GEO:GPL570 (Affymetrix HGU133+2)
GSM887321	GSE36133	Mino	haematopoietic_and_lymphoid_tissue	GEO	GEO:GPL570 (Affymetrix HGU133+2)
GSM887322	GSE36133	MJ	haematopoietic_and_lymphoid_tissue	GEO	GEO:GPL570 (Affymetrix HGU133+2)
GSM887328	GSE36133	MM1-S	haematopoietic_and_lymphoid_tissue	GEO	GEO:GPL570 (Affymetrix HGU133+2)
GSM887329	GSE36133	MOLM-13	haematopoietic_and_lymphoid_tissue	GEO	GEO:GPL570 (Affymetrix HGU133+2)
GSM887330	GSE36133	MOLM-16	haematopoietic_and_lymphoid_tissue	GEO	GEO:GPL570 (Affymetrix HGU133+2)
GSM887331	GSE36133	MOLM-6	haematopoietic_and_lymphoid_tissue	GEO	GEO:GPL570 (Affymetrix HGU133+2)
GSM887332	GSE36133	MOLP-2	haematopoietic_and_lymphoid_tissue	GEO	GEO:GPL570 (Affymetrix HGU133+2)
GSM887333	GSE36133	MOLP-8	haematopoietic_and_lymphoid_tissue	GEO	GEO:GPL570 (Affymetrix HGU133+2)
GSM887334	GSE36133	MOLT-13	haematopoietic_and_lymphoid_tissue	GEO	GEO:GPL570 (Affymetrix HGU133+2)
GSM887335	GSE36133	MOLT-16	haematopoietic_and_lymphoid_tissue	GEO	GEO:GPL570 (Affymetrix HGU133+2)
GSM887336	GSE36133	MOLT-4	haematopoietic_and_lymphoid_tissue	GEO	GEO:GPL570 (Affymetrix HGU133+2)
GSM887337	GSE36133	MONO-MAC-1	haematopoietic_and_lymphoid_tissue	GEO	GEO:GPL570 (Affymetrix HGU133+2)
GSM887338	GSE36133	MONO-MAC-6	haematopoietic_and_lymphoid_tissue	GEO	GEO:GPL570 (Affymetrix HGU133+2)
GSM887340	GSE36133	MOTN-1	haematopoietic_and_lymphoid_tissue	GEO	GEO:GPL570 (Affymetrix HGU133+2)
GSM887343	GSE36133	MUTZ-5	haematopoietic_and_lymphoid_tissue	GEO	GEO:GPL570 (Affymetrix HGU133+2)
GSM887344	GSE36133	MV-4-11	haematopoietic_and_lymphoid_tissue	GEO	GEO:GPL570 (Affymetrix HGU133+2)
GSM887345	GSE36133	NALM-19	haematopoietic_and_lymphoid_tissue	GEO	GEO:GPL570 (Affymetrix HGU133+2)
GSM887346	GSE36133	NALM-1	haematopoietic_and_lymphoid_tissue	GEO	GEO:GPL570 (Affymetrix HGU133+2)
GSM887347	GSE36133	NALM-6	haematopoietic_and_lymphoid_tissue	GEO	GEO:GPL570 (Affymetrix HGU133+2)
GSM887349	GSE36133	NB-4	haematopoietic_and_lymphoid_tissue	GEO	GEO:GPL570 (Affymetrix HGU133+2)
GSM887452	GSE36133	NCI-H929	haematopoietic_and_lymphoid_tissue	GEO	GEO:GPL570 (Affymetrix HGU133+2)
GSM887454	GSE36133	NCO2	haematopoietic_and_lymphoid_tissue	GEO	GEO:GPL570 (Affymetrix HGU133+2)
GSM887458	GSE36133	NOMO-1	haematopoietic_and_lymphoid_tissue	GEO	GEO:GPL570 (Affymetrix HGU133+2)
GSM887459	GSE36133	NU-DHL-1	haematopoietic_and_lymphoid_tissue	GEO	GEO:GPL570 (Affymetrix HGU133+2)
GSM887460	GSE36133	NU-DUL-1	haematopoietic_and_lymphoid_tissue	GEO	GEO:GPL570 (Affymetrix HGU133+2)
GSM887468	GSE36133	OCI-AML2	haematopoietic_and_lymphoid_tissue	GEO	GEO:GPL570 (Affymetrix HGU133+2)
GSM887469	GSE36133	OCI-AML3	haematopoietic_and_lymphoid_tissue	GEO	GEO:GPL570 (Affymetrix HGU133+2)
GSM887470	GSE36133	OCI-AML5	haematopoietic_and_lymphoid_tissue	GEO	GEO:GPL570 (Affymetrix HGU133+2)
GSM887471	GSE36133	OCI-LY-19	haematopoietic_and_lymphoid_tissue	GEO	GEO:GPL570 (Affymetrix HGU133+2)
GSM887472	GSE36133	OCI-LY3	haematopoietic_and_lymphoid_tissue	GEO	GEO:GPL570 (Affymetrix HGU133+2)
GSM887473	GSE36133	OCI-M1	haematopoietic_and_lymphoid_tissue	GEO	GEO:GPL570 (Affymetrix HGU133+2)
GSM887478	GSE36133	OPM-2	haematopoietic_and_lymphoid_tissue	GEO	GEO:GPL570 (Affymetrix HGU133+2)
GSM887491	GSE36133	P12-ICHIKAWA	haematopoietic_and_lymphoid_tissue	GEO	GEO:GPL570 (Affymetrix HGU133+2)
GSM887492	GSE36133	P31/FUJ	haematopoietic_and_lymphoid_tissue	GEO	GEO:GPL570 (Affymetrix HGU133+2)
GSM887493	GSE36133	P3HR-1	haematopoietic_and_lymphoid_tissue	GEO	GEO:GPL570 (Affymetrix HGU133+2)
GSM887507	GSE36133	PCM6	haematopoietic_and_lymphoid_tissue	GEO	GEO:GPL570 (Affymetrix HGU133+2)
GSM887512	GSE36133	PEER	haematopoietic_and_lymphoid_tissue	GEO	GEO:GPL570 (Affymetrix HGU133+2)
GSM887513	GSE36133	PF-382	haematopoietic_and_lymphoid_tissue	GEO	GEO:GPL570 (Affymetrix HGU133+2)
GSM887514	GSE36133	Pfeiffer	haematopoietic_and_lymphoid_tissue	GEO	GEO:GPL570 (Affymetrix HGU133+2)
GSM887518	GSE36133	PL-21	haematopoietic_and_lymphoid_tissue	GEO	GEO:GPL570 (Affymetrix HGU133+2)
GSM887523	GSE36133	Raji	haematopoietic_and_lymphoid_tissue	GEO	GEO:GPL570 (Affymetrix HGU133+2)
GSM887525	GSE36133	RCH-ACV	haematopoietic_and_lymphoid_tissue	GEO	GEO:GPL570 (Affymetrix HGU133+2)
GSM887529	GSE36133	REC-1	haematopoietic_and_lymphoid_tissue	GEO	GEO:GPL570 (Affymetrix HGU133+2)
GSM887530	GSE36133	Reh	haematopoietic_and_lymphoid_tissue	GEO	GEO:GPL570 (Affymetrix HGU133+2)
GSM887539	GSE36133	RI-1	haematopoietic_and_lymphoid_tissue	GEO	GEO:GPL570 (Affymetrix HGU133+2)
GSM887543	GSE36133	RL	haematopoietic_and_lymphoid_tissue	GEO	GEO:GPL570 (Affymetrix HGU133+2)
GSM887546	GSE36133	RPMI 6666	haematopoietic_and_lymphoid_tissue	GEO	GEO:GPL570 (Affymetrix HGU133+2)
GSM887548	GSE36133	RPMI 8226	haematopoietic_and_lymphoid_tissue	GEO	GEO:GPL570 (Affymetrix HGU133+2)
GSM887549	GSE36133	RPMI-8402	haematopoietic_and_lymphoid_tissue	GEO	GEO:GPL570 (Affymetrix HGU133+2)
GSM887550	GSE36133	RS4;11	haematopoietic_and_lymphoid_tissue	GEO	GEO:GPL570 (Affymetrix HGU133+2)
GSM887563	GSE36133	SEM	haematopoietic_and_lymphoid_tissue	GEO	GEO:GPL570 (Affymetrix HGU133+2)
GSM887564	GSE36133	Set-2	haematopoietic_and_lymphoid_tissue	GEO	GEO:GPL570 (Affymetrix HGU133+2)
GSM887571	GSE36133	SIG-M5	haematopoietic_and_lymphoid_tissue	GEO	GEO:GPL570 (Affymetrix HGU133+2)
GSM887581	GSE36133	SKM-1	haematopoietic_and_lymphoid_tissue	GEO	GEO:GPL570 (Affymetrix HGU133+2)
GSM887591	GSE36133	SK-MM-2	haematopoietic_and_lymphoid_tissue	GEO	GEO:GPL570 (Affymetrix HGU133+2)
GSM887648	GSE36133	SR-786	haematopoietic_and_lymphoid_tissue	GEO	GEO:GPL570 (Affymetrix HGU133+2)
GSM887649	GSE36133	ST486	haematopoietic_and_lymphoid_tissue	GEO	GEO:GPL570 (Affymetrix HGU133+2)
GSM887651	GSE36133	SU-DHL-10	haematopoietic_and_lymphoid_tissue	GEO	GEO:GPL570 (Affymetrix HGU133+2)
GSM887652	GSE36133	SU-DHL-1	haematopoietic_and_lymphoid_tissue	GEO	GEO:GPL570 (Affymetrix HGU133+2)
GSM887653	GSE36133	SU-DHL-4	haematopoietic_and_lymphoid_tissue	GEO	GEO:GPL570 (Affymetrix HGU133+2)
GSM887654	GSE36133	SU-DHL-5	haematopoietic_and_lymphoid_tissue	GEO	GEO:GPL570 (Affymetrix HGU133+2)
GSM887655	GSE36133	SU-DHL-6	haematopoietic_and_lymphoid_tissue	GEO	GEO:GPL570 (Affymetrix HGU133+2)
GSM887656	GSE36133	SU-DHL-8	haematopoietic_and_lymphoid_tissue	GEO	GEO:GPL570 (Affymetrix HGU133+2)
GSM887658	GSE36133	SUP-B15	haematopoietic_and_lymphoid_tissue	GEO	GEO:GPL570 (Affymetrix HGU133+2)
GSM887659	GSE36133	SUP-HD1	haematopoietic_and_lymphoid_tissue	GEO	GEO:GPL570 (Affymetrix HGU133+2)
GSM887660	GSE36133	SUP-M2	haematopoietic_and_lymphoid_tissue	GEO	GEO:GPL570 (Affymetrix HGU133+2)
GSM887661	GSE36133	SUP-T11	haematopoietic_and_lymphoid_tissue	GEO	GEO:GPL570 (Affymetrix HGU133+2)
GSM887662	GSE36133	SUP-T1	haematopoietic_and_lymphoid_tissue	GEO	GEO:GPL570 (Affymetrix HGU133+2)
GSM887688	GSE36133	TALL-1	haematopoietic_and_lymphoid_tissue	GEO	GEO:GPL570 (Affymetrix HGU133+2)
GSM887704	GSE36133	TF-1	haematopoietic_and_lymphoid_tissue	GEO	GEO:GPL570 (Affymetrix HGU133+2)
GSM887706	GSE36133	THP-1	haematopoietic_and_lymphoid_tissue	GEO	GEO:GPL570 (Affymetrix HGU133+2)
GSM887708	GSE36133	TO 175.T	haematopoietic_and_lymphoid_tissue	GEO	GEO:GPL570 (Affymetrix HGU133+2)
GSM887709	GSE36133	Toledo	haematopoietic_and_lymphoid_tissue	GEO	GEO:GPL570 (Affymetrix HGU133+2)
GSM887721	GSE36133	U266B1	haematopoietic_and_lymphoid_tissue	GEO	GEO:GPL570 (Affymetrix HGU133+2)
GSM887724	GSE36133	U-937	haematopoietic_and_lymphoid_tissue	GEO	GEO:GPL570 (Affymetrix HGU133+2)
GSM887730	GSE36133	UT-7	haematopoietic_and_lymphoid_tissue	GEO	GEO:GPL570 (Affymetrix HGU133+2)
GSM887741	GSE36133	WSU-DLCL2	haematopoietic_and_lymphoid_tissue	GEO	GEO:GPL570 (Affymetrix HGU133+2)
GSM886844	GSE36133	769-P	kidney	GEO	GEO:GPL570 (Affymetrix HGU133+2)
GSM886845	GSE36133	786-O	kidney	GEO	GEO:GPL570 (Affymetrix HGU133+2)
GSM886856	GSE36133	A-498	kidney	GEO	GEO:GPL570 (Affymetrix HGU133+2)
GSM886860	GSE36133	A-704	kidney	GEO	GEO:GPL570 (Affymetrix HGU133+2)
GSM886863	GSE36133	ACHN	kidney	GEO	GEO:GPL570 (Affymetrix HGU133+2)
GSM886880	GSE36133	BFTC-909	kidney	GEO	GEO:GPL570 (Affymetrix HGU133+2)
GSM886902	GSE36133	Caki-1	kidney	GEO	GEO:GPL570 (Affymetrix HGU133+2)
GSM886903	GSE36133	Caki-2	kidney	GEO	GEO:GPL570 (Affymetrix HGU133+2)
GSM886910	GSE36133	CAL-54	kidney	GEO	GEO:GPL570 (Affymetrix HGU133+2)
GSM887216	GSE36133	KMRC-1	kidney	GEO	GEO:GPL570 (Affymetrix HGU133+2)
GSM887217	GSE36133	KMRC-20	kidney	GEO	GEO:GPL570 (Affymetrix HGU133+2)
GSM887218	GSE36133	KMRC-2	kidney	GEO	GEO:GPL570 (Affymetrix HGU133+2)
GSM887219	GSE36133	KMRC-3	kidney	GEO	GEO:GPL570 (Affymetrix HGU133+2)
GSM887524	GSE36133	RCC10RGB	kidney	GEO	GEO:GPL570 (Affymetrix HGU133+2)
GSM887610	GSE36133	SNU-1272	kidney	GEO	GEO:GPL570 (Affymetrix HGU133+2)
GSM887715	GSE36133	TUHR10TKB	kidney	GEO	GEO:GPL570 (Affymetrix HGU133+2)
GSM887716	GSE36133	TUHR14TKB	kidney	GEO	GEO:GPL570 (Affymetrix HGU133+2)
GSM887717	GSE36133	TUHR4TKB	kidney	GEO	GEO:GPL570 (Affymetrix HGU133+2)
GSM887733	GSE36133	VMRC-RCW	kidney	GEO	GEO:GPL570 (Affymetrix HGU133+2)
GSM887734	GSE36133	VMRC-RCZ	kidney	GEO	GEO:GPL570 (Affymetrix HGU133+2)
GSM886897	GSE36133	C2BBe1	large_intestine	GEO	GEO:GPL570 (Affymetrix HGU133+2)
GSM886924	GSE36133	CCK-81	large_intestine	GEO	GEO:GPL570 (Affymetrix HGU133+2)
GSM886933	GSE36133	CL-11	large_intestine	GEO	GEO:GPL570 (Affymetrix HGU133+2)
GSM886934	GSE36133	CL-14	large_intestine	GEO	GEO:GPL570 (Affymetrix HGU133+2)
GSM886935	GSE36133	CL-34	large_intestine	GEO	GEO:GPL570 (Affymetrix HGU133+2)
GSM886936	GSE36133	CL-40	large_intestine	GEO	GEO:GPL570 (Affymetrix HGU133+2)
GSM886940	GSE36133	COLO 205	large_intestine	GEO	GEO:GPL570 (Affymetrix HGU133+2)
GSM886941	GSE36133	COLO-320	large_intestine	GEO	GEO:GPL570 (Affymetrix HGU133+2)
GSM886943	GSE36133	COLO-678	large_intestine	GEO	GEO:GPL570 (Affymetrix HGU133+2)
GSM886968	GSE36133	CW-2	large_intestine	GEO	GEO:GPL570 (Affymetrix HGU133+2)
GSM886979	GSE36133	DLD-1	large_intestine	GEO	GEO:GPL570 (Affymetrix HGU133+2)
GSM887027	GSE36133	GP2d	large_intestine	GEO	GEO:GPL570 (Affymetrix HGU133+2)
GSM887057	GSE36133	HCC-56	large_intestine	GEO	GEO:GPL570 (Affymetrix HGU133+2)
GSM887062	GSE36133	HCT 116	large_intestine	GEO	GEO:GPL570 (Affymetrix HGU133+2)
GSM887063	GSE36133	HCT-15	large_intestine	GEO	GEO:GPL570 (Affymetrix HGU133+2)
GSM887105	GSE36133	Hs 675.T	large_intestine	GEO	GEO:GPL570 (Affymetrix HGU133+2)
GSM887109	GSE36133	Hs 698.T	large_intestine	GEO	GEO:GPL570 (Affymetrix HGU133+2)
GSM887137	GSE36133	HT115	large_intestine	GEO	GEO:GPL570 (Affymetrix HGU133+2)
GSM887141	GSE36133	HT-29	large_intestine	GEO	GEO:GPL570 (Affymetrix HGU133+2)
GSM887142	GSE36133	HT55	large_intestine	GEO	GEO:GPL570 (Affymetrix HGU133+2)
GSM887212	GSE36133	KM12	large_intestine	GEO	GEO:GPL570 (Affymetrix HGU133+2)
GSM887274	GSE36133	LoVo	large_intestine	GEO	GEO:GPL570 (Affymetrix HGU133+2)
GSM887277	GSE36133	LS1034	large_intestine	GEO	GEO:GPL570 (Affymetrix HGU133+2)
GSM887278	GSE36133	LS123	large_intestine	GEO	GEO:GPL570 (Affymetrix HGU133+2)
GSM887279	GSE36133	LS 180	large_intestine	GEO	GEO:GPL570 (Affymetrix HGU133+2)
GSM887280	GSE36133	LS411N	large_intestine	GEO	GEO:GPL570 (Affymetrix HGU133+2)
GSM887281	GSE36133	LS513	large_intestine	GEO	GEO:GPL570 (Affymetrix HGU133+2)
GSM887303	GSE36133	MDST8	large_intestine	GEO	GEO:GPL570 (Affymetrix HGU133+2)
GSM887431	GSE36133	NCI-H508	large_intestine	GEO	GEO:GPL570 (Affymetrix HGU133+2)
GSM887443	GSE36133	NCI-H716	large_intestine	GEO	GEO:GPL570 (Affymetrix HGU133+2)
GSM887445	GSE36133	NCI-H747	large_intestine	GEO	GEO:GPL570 (Affymetrix HGU133+2)
GSM887479	GSE36133	OUMS-23	large_intestine	GEO	GEO:GPL570 (Affymetrix HGU133+2)
GSM887526	GSE36133	RCM-1	large_intestine	GEO	GEO:GPL570 (Affymetrix HGU133+2)
GSM887541	GSE36133	RKO	large_intestine	GEO	GEO:GPL570 (Affymetrix HGU133+2)
GSM887576	GSE36133	SK-CO-1	large_intestine	GEO	GEO:GPL570 (Affymetrix HGU133+2)
GSM887602	GSE36133	SNU-1040	large_intestine	GEO	GEO:GPL570 (Affymetrix HGU133+2)
GSM887612	GSE36133	SNU-175	large_intestine	GEO	GEO:GPL570 (Affymetrix HGU133+2)
GSM887619	GSE36133	SNU-283	large_intestine	GEO	GEO:GPL570 (Affymetrix HGU133+2)
GSM887624	GSE36133	SNU-407	large_intestine	GEO	GEO:GPL570 (Affymetrix HGU133+2)
GSM887632	GSE36133	SNU-503	large_intestine	GEO	GEO:GPL570 (Affymetrix HGU133+2)
GSM887635	GSE36133	SNU-61	large_intestine	GEO	GEO:GPL570 (Affymetrix HGU133+2)
GSM887643	GSE36133	SNU-C1	large_intestine	GEO	GEO:GPL570 (Affymetrix HGU133+2)
GSM887644	GSE36133	SNU-C2A	large_intestine	GEO	GEO:GPL570 (Affymetrix HGU133+2)
GSM887645	GSE36133	SNU-C4	large_intestine	GEO	GEO:GPL570 (Affymetrix HGU133+2)
GSM887646	GSE36133	SNU-C5	large_intestine	GEO	GEO:GPL570 (Affymetrix HGU133+2)
GSM887664	GSE36133	SW1116	large_intestine	GEO	GEO:GPL570 (Affymetrix HGU133+2)
GSM887667	GSE36133	SW1417	large_intestine	GEO	GEO:GPL570 (Affymetrix HGU133+2)
GSM887668	GSE36133	SW1463	large_intestine	GEO	GEO:GPL570 (Affymetrix HGU133+2)
GSM887673	GSE36133	SW403	large_intestine	GEO	GEO:GPL570 (Affymetrix HGU133+2)
GSM887674	GSE36133	SW480	large_intestine	GEO	GEO:GPL570 (Affymetrix HGU133+2)
GSM887675	GSE36133	SW48	large_intestine	GEO	GEO:GPL570 (Affymetrix HGU133+2)
GSM887677	GSE36133	SW620	large_intestine	GEO	GEO:GPL570 (Affymetrix HGU133+2)
GSM887679	GSE36133	SW837	large_intestine	GEO	GEO:GPL570 (Affymetrix HGU133+2)
GSM887681	GSE36133	SW948	large_intestine	GEO	GEO:GPL570 (Affymetrix HGU133+2)
GSM887686	GSE36133	T84	large_intestine	GEO	GEO:GPL570 (Affymetrix HGU133+2)
GSM886865	GSE36133	Alexander cells	liver	GEO	GEO:GPL570 (Affymetrix HGU133+2)
GSM886899	GSE36133	C3A	liver	GEO	GEO:GPL570 (Affymetrix HGU133+2)
GSM887078	GSE36133	Hep 3B2.1-7	liver	GEO	GEO:GPL570 (Affymetrix HGU133+2)
GSM887079	GSE36133	Hep G2	liver	GEO	GEO:GPL570 (Affymetrix HGU133+2)
GSM887084	GSE36133	HLE	liver	GEO	GEO:GPL570 (Affymetrix HGU133+2)
GSM887086	GSE36133	HLF	liver	GEO	GEO:GPL570 (Affymetrix HGU133+2)
GSM887146	GSE36133	huH-1	liver	GEO	GEO:GPL570 (Affymetrix HGU133+2)
GSM887148	GSE36133	HuH-6	liver	GEO	GEO:GPL570 (Affymetrix HGU133+2)
GSM887149	GSE36133	HuH-7	liver	GEO	GEO:GPL570 (Affymetrix HGU133+2)
GSM887169	GSE36133	JHH-1	liver	GEO	GEO:GPL570 (Affymetrix HGU133+2)
GSM887170	GSE36133	JHH-2	liver	GEO	GEO:GPL570 (Affymetrix HGU133+2)
GSM887171	GSE36133	JHH-4	liver	GEO	GEO:GPL570 (Affymetrix HGU133+2)
GSM887172	GSE36133	JHH-5	liver	GEO	GEO:GPL570 (Affymetrix HGU133+2)
GSM887173	GSE36133	JHH-6	liver	GEO	GEO:GPL570 (Affymetrix HGU133+2)
GSM887174	GSE36133	JHH-7	liver	GEO	GEO:GPL570 (Affymetrix HGU133+2)
GSM887266	GSE36133	Li-7	liver	GEO	GEO:GPL570 (Affymetrix HGU133+2)
GSM887520	GSE36133	PLC/PRF/5	liver	GEO	GEO:GPL570 (Affymetrix HGU133+2)
GSM887578	GSE36133	SK-HEP-1	liver	GEO	GEO:GPL570 (Affymetrix HGU133+2)
GSM887613	GSE36133	SNU-182	liver	GEO	GEO:GPL570 (Affymetrix HGU133+2)
GSM887622	GSE36133	SNU-387	liver	GEO	GEO:GPL570 (Affymetrix HGU133+2)
GSM887623	GSE36133	SNU-398	liver	GEO	GEO:GPL570 (Affymetrix HGU133+2)
GSM887626	GSE36133	SNU-423	liver	GEO	GEO:GPL570 (Affymetrix HGU133+2)
GSM887627	GSE36133	SNU-449	liver	GEO	GEO:GPL570 (Affymetrix HGU133+2)
GSM887630	GSE36133	SNU-475	liver	GEO	GEO:GPL570 (Affymetrix HGU133+2)
GSM887639	GSE36133	SNU-761	liver	GEO	GEO:GPL570 (Affymetrix HGU133+2)
GSM887641	GSE36133	SNU-878	liver	GEO	GEO:GPL570 (Affymetrix HGU133+2)
GSM886858	GSE36133	A549	lung	GEO	GEO:GPL570 (Affymetrix HGU133+2)
GSM886861	GSE36133	ABC-1	lung	GEO	GEO:GPL570 (Affymetrix HGU133+2)
GSM886878	GSE36133	BEN	lung	GEO	GEO:GPL570 (Affymetrix HGU133+2)
GSM886905	GSE36133	CAL-12T	lung	GEO	GEO:GPL570 (Affymetrix HGU133+2)
GSM886914	GSE36133	Calu-1	lung	GEO	GEO:GPL570 (Affymetrix HGU133+2)
GSM886915	GSE36133	Calu-3	lung	GEO	GEO:GPL570 (Affymetrix HGU133+2)
GSM886916	GSE36133	Calu-6	lung	GEO	GEO:GPL570 (Affymetrix HGU133+2)
GSM886927	GSE36133	ChaGo-K-1	lung	GEO	GEO:GPL570 (Affymetrix HGU133+2)
GSM886942	GSE36133	COLO 668	lung	GEO	GEO:GPL570 (Affymetrix HGU133+2)
GSM886946	GSE36133	COLO-699	lung	GEO	GEO:GPL570 (Affymetrix HGU133+2)
GSM886955	GSE36133	COR-L105	lung	GEO	GEO:GPL570 (Affymetrix HGU133+2)
GSM886956	GSE36133	COR-L23	lung	GEO	GEO:GPL570 (Affymetrix HGU133+2)
GSM886957	GSE36133	COR-L24	lung	GEO	GEO:GPL570 (Affymetrix HGU133+2)
GSM886958	GSE36133	COR-L311	lung	GEO	GEO:GPL570 (Affymetrix HGU133+2)
GSM886959	GSE36133	COR-L47	lung	GEO	GEO:GPL570 (Affymetrix HGU133+2)
GSM886960	GSE36133	COR-L88	lung	GEO	GEO:GPL570 (Affymetrix HGU133+2)
GSM886961	GSE36133	COR-L95	lung	GEO	GEO:GPL570 (Affymetrix HGU133+2)
GSM886967	GSE36133	CPC-N	lung	GEO	GEO:GPL570 (Affymetrix HGU133+2)
GSM886980	GSE36133	DMS 114	lung	GEO	GEO:GPL570 (Affymetrix HGU133+2)
GSM886981	GSE36133	DMS 153	lung	GEO	GEO:GPL570 (Affymetrix HGU133+2)
GSM886982	GSE36133	DMS 273	lung	GEO	GEO:GPL570 (Affymetrix HGU133+2)
GSM886983	GSE36133	DMS 454	lung	GEO	GEO:GPL570 (Affymetrix HGU133+2)
GSM886984	GSE36133	DMS 53	lung	GEO	GEO:GPL570 (Affymetrix HGU133+2)
GSM886985	GSE36133	DMS 79	lung	GEO	GEO:GPL570 (Affymetrix HGU133+2)
GSM886990	GSE36133	DV-90	lung	GEO	GEO:GPL570 (Affymetrix HGU133+2)
GSM886993	GSE36133	EBC-1	lung	GEO	GEO:GPL570 (Affymetrix HGU133+2)
GSM887007	GSE36133	EPLC-272H	lung	GEO	GEO:GPL570 (Affymetrix HGU133+2)
GSM887032	GSE36133	HARA	lung	GEO	GEO:GPL570 (Affymetrix HGU133+2)
GSM887034	GSE36133	HCC-1171	lung	GEO	GEO:GPL570 (Affymetrix HGU133+2)
GSM887036	GSE36133	HCC-1195	lung	GEO	GEO:GPL570 (Affymetrix HGU133+2)
GSM887043	GSE36133	HCC-15	lung	GEO	GEO:GPL570 (Affymetrix HGU133+2)
GSM887050	GSE36133	HCC-2279	lung	GEO	GEO:GPL570 (Affymetrix HGU133+2)
GSM887051	GSE36133	HCC2935	lung	GEO	GEO:GPL570 (Affymetrix HGU133+2)
GSM887052	GSE36133	HCC-33	lung	GEO	GEO:GPL570 (Affymetrix HGU133+2)
GSM887053	GSE36133	HCC-366	lung	GEO	GEO:GPL570 (Affymetrix HGU133+2)
GSM887055	GSE36133	HCC4006	lung	GEO	GEO:GPL570 (Affymetrix HGU133+2)
GSM887056	GSE36133	HCC-44	lung	GEO	GEO:GPL570 (Affymetrix HGU133+2)
GSM887059	GSE36133	HCC-78	lung	GEO	GEO:GPL570 (Affymetrix HGU133+2)
GSM887060	GSE36133	HCC827	lung	GEO	GEO:GPL570 (Affymetrix HGU133+2)
GSM887061	GSE36133	HCC-95	lung	GEO	GEO:GPL570 (Affymetrix HGU133+2)
GSM887085	GSE36133	HLF-a	lung	GEO	GEO:GPL570 (Affymetrix HGU133+2)
GSM887093	GSE36133	Hs 229.T	lung	GEO	GEO:GPL570 (Affymetrix HGU133+2)
GSM887104	GSE36133	Hs 618.T	lung	GEO	GEO:GPL570 (Affymetrix HGU133+2)
GSM887156	GSE36133	IA-LM	lung	GEO	GEO:GPL570 (Affymetrix HGU133+2)
GSM887231	GSE36133	KNS-62	lung	GEO	GEO:GPL570 (Affymetrix HGU133+2)
GSM887263	GSE36133	LC-1/sq-SF	lung	GEO	GEO:GPL570 (Affymetrix HGU133+2)
GSM887264	GSE36133	LCLC-103H	lung	GEO	GEO:GPL570 (Affymetrix HGU133+2)
GSM887265	GSE36133	LCLC-97TM1	lung	GEO	GEO:GPL570 (Affymetrix HGU133+2)
GSM887267	GSE36133	LK-2	lung	GEO	GEO:GPL570 (Affymetrix HGU133+2)
GSM887273	GSE36133	LOU-NH91	lung	GEO	GEO:GPL570 (Affymetrix HGU133+2)
GSM887282	GSE36133	LU65	lung	GEO	GEO:GPL570 (Affymetrix HGU133+2)
GSM887283	GSE36133	LU99	lung	GEO	GEO:GPL570 (Affymetrix HGU133+2)
GSM887284	GSE36133	LUDLU-1	lung	GEO	GEO:GPL570 (Affymetrix HGU133+2)
GSM887285	GSE36133	LXF-289	lung	GEO	GEO:GPL570 (Affymetrix HGU133+2)
GSM887339	GSE36133	MOR/CPR	lung	GEO	GEO:GPL570 (Affymetrix HGU133+2)
GSM887350	GSE36133	NCI-H1048	lung	GEO	GEO:GPL570 (Affymetrix HGU133+2)
GSM887351	GSE36133	NCI-H1092	lung	GEO	GEO:GPL570 (Affymetrix HGU133+2)
GSM887352	GSE36133	NCI-H1105	lung	GEO	GEO:GPL570 (Affymetrix HGU133+2)
GSM887353	GSE36133	NCI-H1155	lung	GEO	GEO:GPL570 (Affymetrix HGU133+2)
GSM887354	GSE36133	NCI-H1184	lung	GEO	GEO:GPL570 (Affymetrix HGU133+2)
GSM887355	GSE36133	NCI-H1299	lung	GEO	GEO:GPL570 (Affymetrix HGU133+2)
GSM887356	GSE36133	NCI-H1339	lung	GEO	GEO:GPL570 (Affymetrix HGU133+2)
GSM887357	GSE36133	NCI-H1341	lung	GEO	GEO:GPL570 (Affymetrix HGU133+2)
GSM887358	GSE36133	NCI-H1355	lung	GEO	GEO:GPL570 (Affymetrix HGU133+2)
GSM887359	GSE36133	NCI-H1373	lung	GEO	GEO:GPL570 (Affymetrix HGU133+2)
GSM887360	GSE36133	NCI-H1385	lung	GEO	GEO:GPL570 (Affymetrix HGU133+2)
GSM887361	GSE36133	NCI-H1395	lung	GEO	GEO:GPL570 (Affymetrix HGU133+2)
GSM887362	GSE36133	NCI-H1435	lung	GEO	GEO:GPL570 (Affymetrix HGU133+2)
GSM887363	GSE36133	NCI-H1436	lung	GEO	GEO:GPL570 (Affymetrix HGU133+2)
GSM887364	GSE36133	NCI-H1437	lung	GEO	GEO:GPL570 (Affymetrix HGU133+2)
GSM887365	GSE36133	NCI-H146	lung	GEO	GEO:GPL570 (Affymetrix HGU133+2)
GSM887366	GSE36133	NCI-H1563	lung	GEO	GEO:GPL570 (Affymetrix HGU133+2)
GSM887367	GSE36133	NCI-H1568	lung	GEO	GEO:GPL570 (Affymetrix HGU133+2)
GSM887368	GSE36133	NCI-H1573	lung	GEO	GEO:GPL570 (Affymetrix HGU133+2)
GSM887369	GSE36133	NCI-H1581	lung	GEO	GEO:GPL570 (Affymetrix HGU133+2)
GSM887370	GSE36133	NCI-H1618	lung	GEO	GEO:GPL570 (Affymetrix HGU133+2)
GSM887371	GSE36133	NCI-H1623	lung	GEO	GEO:GPL570 (Affymetrix HGU133+2)
GSM887372	GSE36133	NCI-H1648	lung	GEO	GEO:GPL570 (Affymetrix HGU133+2)
GSM887373	GSE36133	NCI-H1650	lung	GEO	GEO:GPL570 (Affymetrix HGU133+2)
GSM887374	GSE36133	NCI-H1651	lung	GEO	GEO:GPL570 (Affymetrix HGU133+2)
GSM887375	GSE36133	NCI-H1666	lung	GEO	GEO:GPL570 (Affymetrix HGU133+2)
GSM887376	GSE36133	NCI-H1693	lung	GEO	GEO:GPL570 (Affymetrix HGU133+2)
GSM887377	GSE36133	NCI-H1694	lung	GEO	GEO:GPL570 (Affymetrix HGU133+2)
GSM887378	GSE36133	NCI-H1703	lung	GEO	GEO:GPL570 (Affymetrix HGU133+2)
GSM887379	GSE36133	NCI-H1734	lung	GEO	GEO:GPL570 (Affymetrix HGU133+2)
GSM887380	GSE36133	NCI-H1755	lung	GEO	GEO:GPL570 (Affymetrix HGU133+2)
GSM887381	GSE36133	NCI-H1781	lung	GEO	GEO:GPL570 (Affymetrix HGU133+2)
GSM887382	GSE36133	NCI-H1792	lung	GEO	GEO:GPL570 (Affymetrix HGU133+2)
GSM887383	GSE36133	NCI-H1793	lung	GEO	GEO:GPL570 (Affymetrix HGU133+2)
GSM887384	GSE36133	NCI-H1836	lung	GEO	GEO:GPL570 (Affymetrix HGU133+2)
GSM887385	GSE36133	NCI-H1838	lung	GEO	GEO:GPL570 (Affymetrix HGU133+2)
GSM887386	GSE36133	NCI-H1869	lung	GEO	GEO:GPL570 (Affymetrix HGU133+2)
GSM887387	GSE36133	NCI-H1876	lung	GEO	GEO:GPL570 (Affymetrix HGU133+2)
GSM887388	GSE36133	NCI-H1915	lung	GEO	GEO:GPL570 (Affymetrix HGU133+2)
GSM887389	GSE36133	NCI-H1930	lung	GEO	GEO:GPL570 (Affymetrix HGU133+2)
GSM887390	GSE36133	NCI-H1944	lung	GEO	GEO:GPL570 (Affymetrix HGU133+2)
GSM887391	GSE36133	NCI-H1963	lung	GEO	GEO:GPL570 (Affymetrix HGU133+2)
GSM887392	GSE36133	NCI-H196	lung	GEO	GEO:GPL570 (Affymetrix HGU133+2)
GSM887393	GSE36133	NCI-H1975	lung	GEO	GEO:GPL570 (Affymetrix HGU133+2)
GSM887394	GSE36133	NCI-H2009	lung	GEO	GEO:GPL570 (Affymetrix HGU133+2)
GSM887395	GSE36133	NCI-H2023	lung	GEO	GEO:GPL570 (Affymetrix HGU133+2)
GSM887396	GSE36133	NCI-H2029	lung	GEO	GEO:GPL570 (Affymetrix HGU133+2)
GSM887397	GSE36133	NCI-H2030	lung	GEO	GEO:GPL570 (Affymetrix HGU133+2)
GSM887399	GSE36133	NCI-H2066	lung	GEO	GEO:GPL570 (Affymetrix HGU133+2)
GSM887400	GSE36133	NCI-H2081	lung	GEO	GEO:GPL570 (Affymetrix HGU133+2)
GSM887401	GSE36133	NCI-H2085	lung	GEO	GEO:GPL570 (Affymetrix HGU133+2)
GSM887402	GSE36133	NCI-H2087	lung	GEO	GEO:GPL570 (Affymetrix HGU133+2)
GSM887403	GSE36133	NCI-H209	lung	GEO	GEO:GPL570 (Affymetrix HGU133+2)
GSM887404	GSE36133	NCI-H2106	lung	GEO	GEO:GPL570 (Affymetrix HGU133+2)
GSM887405	GSE36133	NCI-H2110	lung	GEO	GEO:GPL570 (Affymetrix HGU133+2)
GSM887406	GSE36133	NCI-H211	lung	GEO	GEO:GPL570 (Affymetrix HGU133+2)
GSM887407	GSE36133	NCI-H2122	lung	GEO	GEO:GPL570 (Affymetrix HGU133+2)
GSM887408	GSE36133	NCI-H2126	lung	GEO	GEO:GPL570 (Affymetrix HGU133+2)
GSM887409	GSE36133	NCI-H2141	lung	GEO	GEO:GPL570 (Affymetrix HGU133+2)
GSM887410	GSE36133	NCI-H2170	lung	GEO	GEO:GPL570 (Affymetrix HGU133+2)
GSM887411	GSE36133	NCI-H2171	lung	GEO	GEO:GPL570 (Affymetrix HGU133+2)
GSM887412	GSE36133	NCI-H2172	lung	GEO	GEO:GPL570 (Affymetrix HGU133+2)
GSM887413	GSE36133	NCI-H2196	lung	GEO	GEO:GPL570 (Affymetrix HGU133+2)
GSM887414	GSE36133	NCI-H2227	lung	GEO	GEO:GPL570 (Affymetrix HGU133+2)
GSM887415	GSE36133	NCI-H2228	lung	GEO	GEO:GPL570 (Affymetrix HGU133+2)
GSM887416	GSE36133	NCI-H226	lung	GEO	GEO:GPL570 (Affymetrix HGU133+2)
GSM887417	GSE36133	NCI-H2286	lung	GEO	GEO:GPL570 (Affymetrix HGU133+2)
GSM887418	GSE36133	NCI-H2291	lung	GEO	GEO:GPL570 (Affymetrix HGU133+2)
GSM887419	GSE36133	NCI-H2342	lung	GEO	GEO:GPL570 (Affymetrix HGU133+2)
GSM887420	GSE36133	NCI-H2347	lung	GEO	GEO:GPL570 (Affymetrix HGU133+2)
GSM887421	GSE36133	NCI-H23	lung	GEO	GEO:GPL570 (Affymetrix HGU133+2)
GSM887422	GSE36133	NCI-H2405	lung	GEO	GEO:GPL570 (Affymetrix HGU133+2)
GSM887423	GSE36133	NCI-H2444	lung	GEO	GEO:GPL570 (Affymetrix HGU133+2)
GSM887426	GSE36133	NCI-H322	lung	GEO	GEO:GPL570 (Affymetrix HGU133+2)
GSM887427	GSE36133	NCI-H358	lung	GEO	GEO:GPL570 (Affymetrix HGU133+2)
GSM887428	GSE36133	NCI-H441	lung	GEO	GEO:GPL570 (Affymetrix HGU133+2)
GSM887429	GSE36133	NCI-H446	lung	GEO	GEO:GPL570 (Affymetrix HGU133+2)
GSM887430	GSE36133	NCI-H460	lung	GEO	GEO:GPL570 (Affymetrix HGU133+2)
GSM887432	GSE36133	NCI-H510	lung	GEO	GEO:GPL570 (Affymetrix HGU133+2)
GSM887433	GSE36133	NCI-H520	lung	GEO	GEO:GPL570 (Affymetrix HGU133+2)
GSM887434	GSE36133	NCI-H522	lung	GEO	GEO:GPL570 (Affymetrix HGU133+2)
GSM887435	GSE36133	NCI-H524	lung	GEO	GEO:GPL570 (Affymetrix HGU133+2)
GSM887436	GSE36133	NCI-H526	lung	GEO	GEO:GPL570 (Affymetrix HGU133+2)
GSM887437	GSE36133	NCI-H596	lung	GEO	GEO:GPL570 (Affymetrix HGU133+2)
GSM887438	GSE36133	NCI-H647	lung	GEO	GEO:GPL570 (Affymetrix HGU133+2)
GSM887439	GSE36133	NCI-H650	lung	GEO	GEO:GPL570 (Affymetrix HGU133+2)
GSM887441	GSE36133	NCI-H661	lung	GEO	GEO:GPL570 (Affymetrix HGU133+2)
GSM887442	GSE36133	NCI-H69	lung	GEO	GEO:GPL570 (Affymetrix HGU133+2)
GSM887444	GSE36133	NCI-H727	lung	GEO	GEO:GPL570 (Affymetrix HGU133+2)
GSM887446	GSE36133	NCI-H810	lung	GEO	GEO:GPL570 (Affymetrix HGU133+2)
GSM887447	GSE36133	NCI-H82	lung	GEO	GEO:GPL570 (Affymetrix HGU133+2)
GSM887448	GSE36133	NCI-H838	lung	GEO	GEO:GPL570 (Affymetrix HGU133+2)
GSM887449	GSE36133	NCI-H841	lung	GEO	GEO:GPL570 (Affymetrix HGU133+2)
GSM887450	GSE36133	NCI-H854	lung	GEO	GEO:GPL570 (Affymetrix HGU133+2)
GSM887451	GSE36133	NCI-H889	lung	GEO	GEO:GPL570 (Affymetrix HGU133+2)
GSM887505	GSE36133	PC-14	lung	GEO	GEO:GPL570 (Affymetrix HGU133+2)
GSM887532	GSE36133	RERF-LC-Ad1	lung	GEO	GEO:GPL570 (Affymetrix HGU133+2)
GSM887533	GSE36133	RERF-LC-Ad2	lung	GEO	GEO:GPL570 (Affymetrix HGU133+2)
GSM887534	GSE36133	RERF-LC-AI	lung	GEO	GEO:GPL570 (Affymetrix HGU133+2)
GSM887535	GSE36133	RERF-LC-KJ	lung	GEO	GEO:GPL570 (Affymetrix HGU133+2)
GSM887536	GSE36133	RERF-LC-MS	lung	GEO	GEO:GPL570 (Affymetrix HGU133+2)
GSM887537	GSE36133	RERF-LC-Sq1	lung	GEO	GEO:GPL570 (Affymetrix HGU133+2)
GSM887556	GSE36133	SBC-5	lung	GEO	GEO:GPL570 (Affymetrix HGU133+2)
GSM887562	GSE36133	SCLC-21H	lung	GEO	GEO:GPL570 (Affymetrix HGU133+2)
GSM887569	GSE36133	SHP-77	lung	GEO	GEO:GPL570 (Affymetrix HGU133+2)
GSM887580	GSE36133	SK-LU-1	lung	GEO	GEO:GPL570 (Affymetrix HGU133+2)
GSM887590	GSE36133	SK-MES-1	lung	GEO	GEO:GPL570 (Affymetrix HGU133+2)
GSM887647	GSE36133	Sq-1	lung	GEO	GEO:GPL570 (Affymetrix HGU133+2)
GSM887665	GSE36133	SW 1271	lung	GEO	GEO:GPL570 (Affymetrix HGU133+2)
GSM887669	GSE36133	SW 1573	lung	GEO	GEO:GPL570 (Affymetrix HGU133+2)
GSM887680	GSE36133	SW 900	lung	GEO	GEO:GPL570 (Affymetrix HGU133+2)
GSM886945	GSE36133	COLO-680N	oesophagus	GEO	GEO:GPL570 (Affymetrix HGU133+2)
GSM886996	GSE36133	EC-GI-10	oesophagus	GEO	GEO:GPL570 (Affymetrix HGU133+2)
GSM887247	GSE36133	KYSE-140	oesophagus	GEO	GEO:GPL570 (Affymetrix HGU133+2)
GSM887248	GSE36133	KYSE-150	oesophagus	GEO	GEO:GPL570 (Affymetrix HGU133+2)
GSM887249	GSE36133	KYSE-180	oesophagus	GEO	GEO:GPL570 (Affymetrix HGU133+2)
GSM887250	GSE36133	KYSE-270	oesophagus	GEO	GEO:GPL570 (Affymetrix HGU133+2)
GSM887251	GSE36133	KYSE-30	oesophagus	GEO	GEO:GPL570 (Affymetrix HGU133+2)
GSM887252	GSE36133	KYSE-410	oesophagus	GEO	GEO:GPL570 (Affymetrix HGU133+2)
GSM887253	GSE36133	KYSE-450	oesophagus	GEO	GEO:GPL570 (Affymetrix HGU133+2)
GSM887254	GSE36133	KYSE-510	oesophagus	GEO	GEO:GPL570 (Affymetrix HGU133+2)
GSM887255	GSE36133	KYSE-520	oesophagus	GEO	GEO:GPL570 (Affymetrix HGU133+2)
GSM887256	GSE36133	KYSE-70	oesophagus	GEO	GEO:GPL570 (Affymetrix HGU133+2)
GSM887475	GSE36133	OE19	oesophagus	GEO	GEO:GPL570 (Affymetrix HGU133+2)
GSM887476	GSE36133	OE33	oesophagus	GEO	GEO:GPL570 (Affymetrix HGU133+2)
GSM887691	GSE36133	TE-10	oesophagus	GEO	GEO:GPL570 (Affymetrix HGU133+2)
GSM887692	GSE36133	TE-11	oesophagus	GEO	GEO:GPL570 (Affymetrix HGU133+2)
GSM887693	GSE36133	TE-14	oesophagus	GEO	GEO:GPL570 (Affymetrix HGU133+2)
GSM887694	GSE36133	TE-15	oesophagus	GEO	GEO:GPL570 (Affymetrix HGU133+2)
GSM887695	GSE36133	TE-1	oesophagus	GEO	GEO:GPL570 (Affymetrix HGU133+2)
GSM887697	GSE36133	TE-4	oesophagus	GEO	GEO:GPL570 (Affymetrix HGU133+2)
GSM887698	GSE36133	TE-5	oesophagus	GEO	GEO:GPL570 (Affymetrix HGU133+2)
GSM887700	GSE36133	TE-6	oesophagus	GEO	GEO:GPL570 (Affymetrix HGU133+2)
GSM887701	GSE36133	TE-8	oesophagus	GEO	GEO:GPL570 (Affymetrix HGU133+2)
GSM887702	GSE36133	TE-9	oesophagus	GEO	GEO:GPL570 (Affymetrix HGU133+2)
GSM887713	GSE36133	T.T	oesophagus	GEO	GEO:GPL570 (Affymetrix HGU133+2)
GSM886853	GSE36133	A2780	ovary	GEO	GEO:GPL570 (Affymetrix HGU133+2)
GSM886918	GSE36133	Caov-3	ovary	GEO	GEO:GPL570 (Affymetrix HGU133+2)
GSM886919	GSE36133	Caov-4	ovary	GEO	GEO:GPL570 (Affymetrix HGU133+2)
GSM886947	GSE36133	COLO-704	ovary	GEO	GEO:GPL570 (Affymetrix HGU133+2)
GSM886962	GSE36133	COV318	ovary	GEO	GEO:GPL570 (Affymetrix HGU133+2)
GSM886963	GSE36133	COV362	ovary	GEO	GEO:GPL570 (Affymetrix HGU133+2)
GSM886964	GSE36133	COV434	ovary	GEO	GEO:GPL570 (Affymetrix HGU133+2)
GSM886965	GSE36133	COV504	ovary	GEO	GEO:GPL570 (Affymetrix HGU133+2)
GSM886966	GSE36133	COV644	ovary	GEO	GEO:GPL570 (Affymetrix HGU133+2)
GSM887000	GSE36133	EFO-21	ovary	GEO	GEO:GPL570 (Affymetrix HGU133+2)
GSM887001	GSE36133	EFO-27	ovary	GEO	GEO:GPL570 (Affymetrix HGU133+2)
GSM887008	GSE36133	ES-2	ovary	GEO	GEO:GPL570 (Affymetrix HGU133+2)
GSM887014	GSE36133	FU-OV-1	ovary	GEO	GEO:GPL570 (Affymetrix HGU133+2)
GSM887080	GSE36133	Hey-A8	ovary	GEO	GEO:GPL570 (Affymetrix HGU133+2)
GSM887160	GSE36133	IGROV1	ovary	GEO	GEO:GPL570 (Affymetrix HGU133+2)
GSM887175	GSE36133	JHOC-5	ovary	GEO	GEO:GPL570 (Affymetrix HGU133+2)
GSM887176	GSE36133	JHOM-1	ovary	GEO	GEO:GPL570 (Affymetrix HGU133+2)
GSM887177	GSE36133	JHOM-2B	ovary	GEO	GEO:GPL570 (Affymetrix HGU133+2)
GSM887178	GSE36133	JHOS-2	ovary	GEO	GEO:GPL570 (Affymetrix HGU133+2)
GSM887179	GSE36133	JHOS-4	ovary	GEO	GEO:GPL570 (Affymetrix HGU133+2)
GSM887290	GSE36133	MCAS	ovary	GEO	GEO:GPL570 (Affymetrix HGU133+2)
GSM887456	GSE36133	NIH:OVCAR-3	ovary	GEO	GEO:GPL570 (Affymetrix HGU133+2)
GSM887464	GSE36133	OAW28	ovary	GEO	GEO:GPL570 (Affymetrix HGU133+2)
GSM887465	GSE36133	OAW42	ovary	GEO	GEO:GPL570 (Affymetrix HGU133+2)
GSM887466	GSE36133	OC 314	ovary	GEO	GEO:GPL570 (Affymetrix HGU133+2)
GSM887467	GSE36133	OC 316	ovary	GEO	GEO:GPL570 (Affymetrix HGU133+2)
GSM887481	GSE36133	OV56	ovary	GEO	GEO:GPL570 (Affymetrix HGU133+2)
GSM887482	GSE36133	OV7	ovary	GEO	GEO:GPL570 (Affymetrix HGU133+2)
GSM887483	GSE36133	OV-90	ovary	GEO	GEO:GPL570 (Affymetrix HGU133+2)
GSM887484	GSE36133	OVCAR-4	ovary	GEO	GEO:GPL570 (Affymetrix HGU133+2)
GSM887485	GSE36133	OVCAR-8	ovary	GEO	GEO:GPL570 (Affymetrix HGU133+2)
GSM887486	GSE36133	OVK18	ovary	GEO	GEO:GPL570 (Affymetrix HGU133+2)
GSM887487	GSE36133	OVKATE	ovary	GEO	GEO:GPL570 (Affymetrix HGU133+2)
GSM887488	GSE36133	OVMANA	ovary	GEO	GEO:GPL570 (Affymetrix HGU133+2)
GSM887489	GSE36133	OVSAHO	ovary	GEO	GEO:GPL570 (Affymetrix HGU133+2)
GSM887490	GSE36133	OVTOKO	ovary	GEO	GEO:GPL570 (Affymetrix HGU133+2)
GSM887544	GSE36133	RMG-I	ovary	GEO	GEO:GPL570 (Affymetrix HGU133+2)
GSM887545	GSE36133	RMUG-S	ovary	GEO	GEO:GPL570 (Affymetrix HGU133+2)
GSM887598	GSE36133	SK-OV-3	ovary	GEO	GEO:GPL570 (Affymetrix HGU133+2)
GSM887608	GSE36133	SNU-119	ovary	GEO	GEO:GPL570 (Affymetrix HGU133+2)
GSM887640	GSE36133	SNU-840	ovary	GEO	GEO:GPL570 (Affymetrix HGU133+2)
GSM887710	GSE36133	TOV-112D	ovary	GEO	GEO:GPL570 (Affymetrix HGU133+2)
GSM887711	GSE36133	TOV-21G	ovary	GEO	GEO:GPL570 (Affymetrix HGU133+2)
GSM887718	GSE36133	TYK-nu	ovary	GEO	GEO:GPL570 (Affymetrix HGU133+2)
GSM886870	GSE36133	AsPC-1	pancreas	GEO	GEO:GPL570 (Affymetrix HGU133+2)
GSM886896	GSE36133	BxPC-3	pancreas	GEO	GEO:GPL570 (Affymetrix HGU133+2)
GSM886920	GSE36133	Capan-1	pancreas	GEO	GEO:GPL570 (Affymetrix HGU133+2)
GSM886921	GSE36133	Capan-2	pancreas	GEO	GEO:GPL570 (Affymetrix HGU133+2)
GSM886925	GSE36133	CFPAC-1	pancreas	GEO	GEO:GPL570 (Affymetrix HGU133+2)
GSM886971	GSE36133	DAN-G	pancreas	GEO	GEO:GPL570 (Affymetrix HGU133+2)
GSM887089	GSE36133	HPAC	pancreas	GEO	GEO:GPL570 (Affymetrix HGU133+2)
GSM887090	GSE36133	HPAF-II	pancreas	GEO	GEO:GPL570 (Affymetrix HGU133+2)
GSM887117	GSE36133	Hs 766T	pancreas	GEO	GEO:GPL570 (Affymetrix HGU133+2)
GSM887151	GSE36133	HUP-T3	pancreas	GEO	GEO:GPL570 (Affymetrix HGU133+2)
GSM887152	GSE36133	HUP-T4	pancreas	GEO	GEO:GPL570 (Affymetrix HGU133+2)
GSM887201	GSE36133	KCI-MOH1	pancreas	GEO	GEO:GPL570 (Affymetrix HGU133+2)
GSM887235	GSE36133	KP-2	pancreas	GEO	GEO:GPL570 (Affymetrix HGU133+2)
GSM887236	GSE36133	KP-3	pancreas	GEO	GEO:GPL570 (Affymetrix HGU133+2)
GSM887237	GSE36133	KP4	pancreas	GEO	GEO:GPL570 (Affymetrix HGU133+2)
GSM887258	GSE36133	L3.3	pancreas	GEO	GEO:GPL570 (Affymetrix HGU133+2)
GSM887320	GSE36133	MIA PaCa-2	pancreas	GEO	GEO:GPL570 (Affymetrix HGU133+2)
GSM887494	GSE36133	Panc 02.03	pancreas	GEO	GEO:GPL570 (Affymetrix HGU133+2)
GSM887495	GSE36133	Panc 02.13	pancreas	GEO	GEO:GPL570 (Affymetrix HGU133+2)
GSM887496	GSE36133	Panc 03.27	pancreas	GEO	GEO:GPL570 (Affymetrix HGU133+2)
GSM887497	GSE36133	Panc 04.03	pancreas	GEO	GEO:GPL570 (Affymetrix HGU133+2)
GSM887498	GSE36133	Panc 05.04	pancreas	GEO	GEO:GPL570 (Affymetrix HGU133+2)
GSM887499	GSE36133	Panc 08.13	pancreas	GEO	GEO:GPL570 (Affymetrix HGU133+2)
GSM887500	GSE36133	Panc 10.05	pancreas	GEO	GEO:GPL570 (Affymetrix HGU133+2)
GSM887501	GSE36133	PANC-1	pancreas	GEO	GEO:GPL570 (Affymetrix HGU133+2)
GSM887502	GSE36133	PA-TU-8902	pancreas	GEO	GEO:GPL570 (Affymetrix HGU133+2)
GSM887503	GSE36133	PA-TU-8988S	pancreas	GEO	GEO:GPL570 (Affymetrix HGU133+2)
GSM887504	GSE36133	PA-TU-8988T	pancreas	GEO	GEO:GPL570 (Affymetrix HGU133+2)
GSM887515	GSE36133	PK-1	pancreas	GEO	GEO:GPL570 (Affymetrix HGU133+2)
GSM887516	GSE36133	PK-45H	pancreas	GEO	GEO:GPL570 (Affymetrix HGU133+2)
GSM887517	GSE36133	PK-59	pancreas	GEO	GEO:GPL570 (Affymetrix HGU133+2)
GSM887519	GSE36133	PL45	pancreas	GEO	GEO:GPL570 (Affymetrix HGU133+2)
GSM887521	GSE36133	PSN1	pancreas	GEO	GEO:GPL570 (Affymetrix HGU133+2)
GSM887522	GSE36133	QGP-1	pancreas	GEO	GEO:GPL570 (Affymetrix HGU133+2)
GSM887616	GSE36133	SNU-213	pancreas	GEO	GEO:GPL570 (Affymetrix HGU133+2)
GSM887621	GSE36133	SNU-324	pancreas	GEO	GEO:GPL570 (Affymetrix HGU133+2)
GSM887625	GSE36133	SNU-410	pancreas	GEO	GEO:GPL570 (Affymetrix HGU133+2)
GSM887650	GSE36133	SU.86.86	pancreas	GEO	GEO:GPL570 (Affymetrix HGU133+2)
GSM887657	GSE36133	SUIT-2	pancreas	GEO	GEO:GPL570 (Affymetrix HGU133+2)
GSM887672	GSE36133	SW 1990	pancreas	GEO	GEO:GPL570 (Affymetrix HGU133+2)
GSM887684	GSE36133	T3M-4	pancreas	GEO	GEO:GPL570 (Affymetrix HGU133+2)
GSM887690	GSE36133	TCC-PAN2	pancreas	GEO	GEO:GPL570 (Affymetrix HGU133+2)
GSM887742	GSE36133	YAPC	pancreas	GEO	GEO:GPL570 (Affymetrix HGU133+2)
GSM886862	GSE36133	ACC-MESO-1	pleura	GEO	GEO:GPL570 (Affymetrix HGU133+2)
GSM887165	GSE36133	IST-MES1	pleura	GEO	GEO:GPL570 (Affymetrix HGU133+2)
GSM887166	GSE36133	IST-MES2	pleura	GEO	GEO:GPL570 (Affymetrix HGU133+2)
GSM887185	GSE36133	JL-1	pleura	GEO	GEO:GPL570 (Affymetrix HGU133+2)
GSM887341	GSE36133	MPP 89	pleura	GEO	GEO:GPL570 (Affymetrix HGU133+2)
GSM887342	GSE36133	MSTO-211H	pleura	GEO	GEO:GPL570 (Affymetrix HGU133+2)
GSM887398	GSE36133	NCI-H2052	pleura	GEO	GEO:GPL570 (Affymetrix HGU133+2)
GSM887424	GSE36133	NCI-H2452	pleura	GEO	GEO:GPL570 (Affymetrix HGU133+2)
GSM887425	GSE36133	NCI-H28	pleura	GEO	GEO:GPL570 (Affymetrix HGU133+2)
GSM886837	GSE36133	22Rv1	prostate	GEO	GEO:GPL570 (Affymetrix HGU133+2)
GSM886988	GSE36133	DU 145	prostate	GEO	GEO:GPL570 (Affymetrix HGU133+2)
GSM887271	GSE36133	LNCaP clone FGC	prostate	GEO	GEO:GPL570 (Affymetrix HGU133+2)
GSM887302	GSE36133	MDA PCa 2b	prostate	GEO	GEO:GPL570 (Affymetrix HGU133+2)
GSM887440	GSE36133	NCI-H660	prostate	GEO	GEO:GPL570 (Affymetrix HGU133+2)
GSM887506	GSE36133	PC-3	prostate	GEO	GEO:GPL570 (Affymetrix HGU133+2)
GSM887731	GSE36133	VCaP	prostate	GEO	GEO:GPL570 (Affymetrix HGU133+2)
GSM886852	GSE36133	A-253	salivary_gland	GEO	GEO:GPL570 (Affymetrix HGU133+2)
GSM887744	GSE36133	YD-15	salivary_gland	GEO	GEO:GPL570 (Affymetrix HGU133+2)
GSM886849	GSE36133	A101D	skin	GEO	GEO:GPL570 (Affymetrix HGU133+2)
GSM886854	GSE36133	A-375	skin	GEO	GEO:GPL570 (Affymetrix HGU133+2)
GSM886898	GSE36133	C32	skin	GEO	GEO:GPL570 (Affymetrix HGU133+2)
GSM886928	GSE36133	CHL-1	skin	GEO	GEO:GPL570 (Affymetrix HGU133+2)
GSM886932	GSE36133	CJM	skin	GEO	GEO:GPL570 (Affymetrix HGU133+2)
GSM886944	GSE36133	COLO-679	skin	GEO	GEO:GPL570 (Affymetrix HGU133+2)
GSM886948	GSE36133	COLO 741	skin	GEO	GEO:GPL570 (Affymetrix HGU133+2)
GSM886949	GSE36133	COLO-783	skin	GEO	GEO:GPL570 (Affymetrix HGU133+2)
GSM886950	GSE36133	COLO 792	skin	GEO	GEO:GPL570 (Affymetrix HGU133+2)
GSM886951	GSE36133	COLO-800	skin	GEO	GEO:GPL570 (Affymetrix HGU133+2)
GSM886952	GSE36133	COLO-818	skin	GEO	GEO:GPL570 (Affymetrix HGU133+2)
GSM886953	GSE36133	COLO 829	skin	GEO	GEO:GPL570 (Affymetrix HGU133+2)
GSM886954	GSE36133	COLO-849	skin	GEO	GEO:GPL570 (Affymetrix HGU133+2)
GSM887016	GSE36133	G-361	skin	GEO	GEO:GPL570 (Affymetrix HGU133+2)
GSM887087	GSE36133	HMCB	skin	GEO	GEO:GPL570 (Affymetrix HGU133+2)
GSM887096	GSE36133	Hs 294T	skin	GEO	GEO:GPL570 (Affymetrix HGU133+2)
GSM887099	GSE36133	Hs 600.T	skin	GEO	GEO:GPL570 (Affymetrix HGU133+2)
GSM887107	GSE36133	Hs 688(A).T	skin	GEO	GEO:GPL570 (Affymetrix HGU133+2)
GSM887108	GSE36133	Hs 695T	skin	GEO	GEO:GPL570 (Affymetrix HGU133+2)
GSM887121	GSE36133	Hs 839.T	skin	GEO	GEO:GPL570 (Affymetrix HGU133+2)
GSM887123	GSE36133	Hs 852.T	skin	GEO	GEO:GPL570 (Affymetrix HGU133+2)
GSM887127	GSE36133	Hs 895.T	skin	GEO	GEO:GPL570 (Affymetrix HGU133+2)
GSM887128	GSE36133	Hs 934.T	skin	GEO	GEO:GPL570 (Affymetrix HGU133+2)
GSM887129	GSE36133	Hs 936.T	skin	GEO	GEO:GPL570 (Affymetrix HGU133+2)
GSM887130	GSE36133	Hs 939.T	skin	GEO	GEO:GPL570 (Affymetrix HGU133+2)
GSM887131	GSE36133	Hs 940.T	skin	GEO	GEO:GPL570 (Affymetrix HGU133+2)
GSM887132	GSE36133	Hs 944.T	skin	GEO	GEO:GPL570 (Affymetrix HGU133+2)
GSM887140	GSE36133	HT-144	skin	GEO	GEO:GPL570 (Affymetrix HGU133+2)
GSM887157	GSE36133	IGR-1	skin	GEO	GEO:GPL570 (Affymetrix HGU133+2)
GSM887158	GSE36133	IGR-37	skin	GEO	GEO:GPL570 (Affymetrix HGU133+2)
GSM887159	GSE36133	IGR-39	skin	GEO	GEO:GPL570 (Affymetrix HGU133+2)
GSM887163	GSE36133	IPC-298	skin	GEO	GEO:GPL570 (Affymetrix HGU133+2)
GSM887192	GSE36133	K029AX	skin	GEO	GEO:GPL570 (Affymetrix HGU133+2)
GSM887275	GSE36133	LOX IMVI	skin	GEO	GEO:GPL570 (Affymetrix HGU133+2)
GSM887288	GSE36133	Malme-3M	skin	GEO	GEO:GPL570 (Affymetrix HGU133+2)
GSM887298	GSE36133	MDA-MB-435S	skin	GEO	GEO:GPL570 (Affymetrix HGU133+2)
GSM887308	GSE36133	MEL-HO	skin	GEO	GEO:GPL570 (Affymetrix HGU133+2)
GSM887309	GSE36133	MEL-JUSO	skin	GEO	GEO:GPL570 (Affymetrix HGU133+2)
GSM887310	GSE36133	MeWo	skin	GEO	GEO:GPL570 (Affymetrix HGU133+2)
GSM887547	GSE36133	RPMI-7951	skin	GEO	GEO:GPL570 (Affymetrix HGU133+2)
GSM887554	GSE36133	RVH-421	skin	GEO	GEO:GPL570 (Affymetrix HGU133+2)
GSM887568	GSE36133	SH-4	skin	GEO	GEO:GPL570 (Affymetrix HGU133+2)
GSM887582	GSE36133	SK-MEL-1	skin	GEO	GEO:GPL570 (Affymetrix HGU133+2)
GSM887583	GSE36133	SK-MEL-24	skin	GEO	GEO:GPL570 (Affymetrix HGU133+2)
GSM887584	GSE36133	SK-MEL-28	skin	GEO	GEO:GPL570 (Affymetrix HGU133+2)
GSM887585	GSE36133	SK-MEL-2	skin	GEO	GEO:GPL570 (Affymetrix HGU133+2)
GSM887586	GSE36133	SK-MEL-30	skin	GEO	GEO:GPL570 (Affymetrix HGU133+2)
GSM887587	GSE36133	SK-MEL-31	skin	GEO	GEO:GPL570 (Affymetrix HGU133+2)
GSM887588	GSE36133	SK-MEL-3	skin	GEO	GEO:GPL570 (Affymetrix HGU133+2)
GSM887589	GSE36133	SK-MEL-5	skin	GEO	GEO:GPL570 (Affymetrix HGU133+2)
GSM887725	GSE36133	UACC-257	skin	GEO	GEO:GPL570 (Affymetrix HGU133+2)
GSM887726	GSE36133	UACC-62	skin	GEO	GEO:GPL570 (Affymetrix HGU133+2)
GSM887735	GSE36133	WM-115	skin	GEO	GEO:GPL570 (Affymetrix HGU133+2)
GSM887736	GSE36133	WM1799	skin	GEO	GEO:GPL570 (Affymetrix HGU133+2)
GSM887737	GSE36133	WM-266-4	skin	GEO	GEO:GPL570 (Affymetrix HGU133+2)
GSM887738	GSE36133	WM-793	skin	GEO	GEO:GPL570 (Affymetrix HGU133+2)
GSM887739	GSE36133	WM-88	skin	GEO	GEO:GPL570 (Affymetrix HGU133+2)
GSM887740	GSE36133	WM-983B	skin	GEO	GEO:GPL570 (Affymetrix HGU133+2)
GSM887155	GSE36133	HuTu 80	small_intestine	GEO	GEO:GPL570 (Affymetrix HGU133+2)
GSM886851	GSE36133	A-204	soft_tissue	GEO	GEO:GPL570 (Affymetrix HGU133+2)
GSM887017	GSE36133	G-401	soft_tissue	GEO	GEO:GPL570 (Affymetrix HGU133+2)
GSM887018	GSE36133	G-402	soft_tissue	GEO	GEO:GPL570 (Affymetrix HGU133+2)
GSM887022	GSE36133	GCT	soft_tissue	GEO	GEO:GPL570 (Affymetrix HGU133+2)
GSM887111	GSE36133	Hs 729	soft_tissue	GEO	GEO:GPL570 (Affymetrix HGU133+2)
GSM887136	GSE36133	HT-1080	soft_tissue	GEO	GEO:GPL570 (Affymetrix HGU133+2)
GSM887245	GSE36133	KYM-1	soft_tissue	GEO	GEO:GPL570 (Affymetrix HGU133+2)
GSM887528	GSE36133	RD	soft_tissue	GEO	GEO:GPL570 (Affymetrix HGU133+2)
GSM887538	GSE36133	RH-41	soft_tissue	GEO	GEO:GPL570 (Affymetrix HGU133+2)
GSM887540	GSE36133	RKN	soft_tissue	GEO	GEO:GPL570 (Affymetrix HGU133+2)
GSM887555	GSE36133	S-117	soft_tissue	GEO	GEO:GPL570 (Affymetrix HGU133+2)
GSM887573	GSE36133	SJRH30	soft_tissue	GEO	GEO:GPL570 (Affymetrix HGU133+2)
GSM887579	GSE36133	SK-LMS-1	soft_tissue	GEO	GEO:GPL570 (Affymetrix HGU133+2)
GSM887599	GSE36133	SK-UT-1	soft_tissue	GEO	GEO:GPL570 (Affymetrix HGU133+2)
GSM887696	GSE36133	TE 441.T	soft_tissue	GEO	GEO:GPL570 (Affymetrix HGU133+2)
GSM887699	GSE36133	TE 617.T	soft_tissue	GEO	GEO:GPL570 (Affymetrix HGU133+2)
GSM886838	GSE36133	23132/87	stomach	GEO	GEO:GPL570 (Affymetrix HGU133+2)
GSM886864	GSE36133	AGS	stomach	GEO	GEO:GPL570 (Affymetrix HGU133+2)
GSM886872	GSE36133	AZ-521	stomach	GEO	GEO:GPL570 (Affymetrix HGU133+2)
GSM886994	GSE36133	ECC10	stomach	GEO	GEO:GPL570 (Affymetrix HGU133+2)
GSM886995	GSE36133	ECC12	stomach	GEO	GEO:GPL570 (Affymetrix HGU133+2)
GSM887013	GSE36133	FU97	stomach	GEO	GEO:GPL570 (Affymetrix HGU133+2)
GSM887021	GSE36133	GCIY	stomach	GEO	GEO:GPL570 (Affymetrix HGU133+2)
GSM887029	GSE36133	GSS	stomach	GEO	GEO:GPL570 (Affymetrix HGU133+2)
GSM887030	GSE36133	GSU	stomach	GEO	GEO:GPL570 (Affymetrix HGU133+2)
GSM887081	GSE36133	HGC-27	stomach	GEO	GEO:GPL570 (Affymetrix HGU133+2)
GSM887115	GSE36133	Hs 746T	stomach	GEO	GEO:GPL570 (Affymetrix HGU133+2)
GSM887145	GSE36133	HuG1-N	stomach	GEO	GEO:GPL570 (Affymetrix HGU133+2)
GSM887161	GSE36133	IM95	stomach	GEO	GEO:GPL570 (Affymetrix HGU133+2)
GSM887200	GSE36133	KATO III	stomach	GEO	GEO:GPL570 (Affymetrix HGU133+2)
GSM887204	GSE36133	KE-39	stomach	GEO	GEO:GPL570 (Affymetrix HGU133+2)
GSM887268	GSE36133	LMSU	stomach	GEO	GEO:GPL570 (Affymetrix HGU133+2)
GSM887323	GSE36133	MKN1	stomach	GEO	GEO:GPL570 (Affymetrix HGU133+2)
GSM887324	GSE36133	MKN-45	stomach	GEO	GEO:GPL570 (Affymetrix HGU133+2)
GSM887325	GSE36133	MKN74	stomach	GEO	GEO:GPL570 (Affymetrix HGU133+2)
GSM887326	GSE36133	MKN7	stomach	GEO	GEO:GPL570 (Affymetrix HGU133+2)
GSM887453	GSE36133	NCI-N87	stomach	GEO	GEO:GPL570 (Affymetrix HGU133+2)
GSM887461	GSE36133	NUGC-2	stomach	GEO	GEO:GPL570 (Affymetrix HGU133+2)
GSM887462	GSE36133	NUGC-3	stomach	GEO	GEO:GPL570 (Affymetrix HGU133+2)
GSM887463	GSE36133	NUGC-4	stomach	GEO	GEO:GPL570 (Affymetrix HGU133+2)
GSM887474	GSE36133	OCUM-1	stomach	GEO	GEO:GPL570 (Affymetrix HGU133+2)
GSM887531	GSE36133	RERF-GC-1B	stomach	GEO	GEO:GPL570 (Affymetrix HGU133+2)
GSM887567	GSE36133	SH-10-TC	stomach	GEO	GEO:GPL570 (Affymetrix HGU133+2)
GSM887611	GSE36133	SNU-16	stomach	GEO	GEO:GPL570 (Affymetrix HGU133+2)
GSM887614	GSE36133	SNU-1	stomach	GEO	GEO:GPL570 (Affymetrix HGU133+2)
GSM887617	GSE36133	SNU-216	stomach	GEO	GEO:GPL570 (Affymetrix HGU133+2)
GSM887633	GSE36133	SNU-520	stomach	GEO	GEO:GPL570 (Affymetrix HGU133+2)
GSM887634	GSE36133	SNU-5	stomach	GEO	GEO:GPL570 (Affymetrix HGU133+2)
GSM887636	GSE36133	SNU-620	stomach	GEO	GEO:GPL570 (Affymetrix HGU133+2)
GSM887705	GSE36133	TGBC11TKB	stomach	GEO	GEO:GPL570 (Affymetrix HGU133+2)
GSM886846	GSE36133	8305C	thyroid	GEO	GEO:GPL570 (Affymetrix HGU133+2)
GSM886847	GSE36133	8505C	thyroid	GEO	GEO:GPL570 (Affymetrix HGU133+2)
GSM886875	GSE36133	B-CPAP	thyroid	GEO	GEO:GPL570 (Affymetrix HGU133+2)
GSM886881	GSE36133	BHT-101	thyroid	GEO	GEO:GPL570 (Affymetrix HGU133+2)
GSM886911	GSE36133	CAL-62	thyroid	GEO	GEO:GPL570 (Affymetrix HGU133+2)
GSM886926	GSE36133	CGTH-W-1	thyroid	GEO	GEO:GPL570 (Affymetrix HGU133+2)
GSM887012	GSE36133	FTC-133	thyroid	GEO	GEO:GPL570 (Affymetrix HGU133+2)
GSM887327	GSE36133	ML-1	thyroid	GEO	GEO:GPL570 (Affymetrix HGU133+2)
GSM887676	GSE36133	SW579	thyroid	GEO	GEO:GPL570 (Affymetrix HGU133+2)
GSM887712	GSE36133	TT2609-C02	thyroid	GEO	GEO:GPL570 (Affymetrix HGU133+2)
GSM887714	GSE36133	TT	thyroid	GEO	GEO:GPL570 (Affymetrix HGU133+2)
GSM886882	GSE36133	BHY	upper_aerodigestive_tract	GEO	GEO:GPL570 (Affymetrix HGU133+2)
GSM886883	GSE36133	BICR 16	upper_aerodigestive_tract	GEO	GEO:GPL570 (Affymetrix HGU133+2)
GSM886884	GSE36133	BICR 18	upper_aerodigestive_tract	GEO	GEO:GPL570 (Affymetrix HGU133+2)
GSM886885	GSE36133	BICR 22	upper_aerodigestive_tract	GEO	GEO:GPL570 (Affymetrix HGU133+2)
GSM886886	GSE36133	BICR 31	upper_aerodigestive_tract	GEO	GEO:GPL570 (Affymetrix HGU133+2)
GSM886887	GSE36133	BICR 56	upper_aerodigestive_tract	GEO	GEO:GPL570 (Affymetrix HGU133+2)
GSM886888	GSE36133	BICR 6	upper_aerodigestive_tract	GEO	GEO:GPL570 (Affymetrix HGU133+2)
GSM886907	GSE36133	CAL 27	upper_aerodigestive_tract	GEO	GEO:GPL570 (Affymetrix HGU133+2)
GSM886977	GSE36133	Detroit 562	upper_aerodigestive_tract	GEO	GEO:GPL570 (Affymetrix HGU133+2)
GSM887011	GSE36133	FaDu	upper_aerodigestive_tract	GEO	GEO:GPL570 (Affymetrix HGU133+2)
GSM887122	GSE36133	Hs 840.T	upper_aerodigestive_tract	GEO	GEO:GPL570 (Affymetrix HGU133+2)
GSM887133	GSE36133	HSC-2	upper_aerodigestive_tract	GEO	GEO:GPL570 (Affymetrix HGU133+2)
GSM887134	GSE36133	HSC-3	upper_aerodigestive_tract	GEO	GEO:GPL570 (Affymetrix HGU133+2)
GSM887135	GSE36133	HSC-4	upper_aerodigestive_tract	GEO	GEO:GPL570 (Affymetrix HGU133+2)
GSM887508	GSE36133	PE/CA-PJ15	upper_aerodigestive_tract	GEO	GEO:GPL570 (Affymetrix HGU133+2)
GSM887509	GSE36133	PE/CA-PJ34 (clone C12)	upper_aerodigestive_tract	GEO	GEO:GPL570 (Affymetrix HGU133+2)
GSM887510	GSE36133	PE/CA-PJ41 (clone D2)	upper_aerodigestive_tract	GEO	GEO:GPL570 (Affymetrix HGU133+2)
GSM887511	GSE36133	PE/CA-PJ49	upper_aerodigestive_tract	GEO	GEO:GPL570 (Affymetrix HGU133+2)
GSM887558	GSE36133	SCC-15	upper_aerodigestive_tract	GEO	GEO:GPL570 (Affymetrix HGU133+2)
GSM887559	GSE36133	SCC-25	upper_aerodigestive_tract	GEO	GEO:GPL570 (Affymetrix HGU133+2)
GSM887560	GSE36133	SCC-4	upper_aerodigestive_tract	GEO	GEO:GPL570 (Affymetrix HGU133+2)
GSM887561	GSE36133	SCC-9	upper_aerodigestive_tract	GEO	GEO:GPL570 (Affymetrix HGU133+2)
GSM887603	GSE36133	SNU-1076	upper_aerodigestive_tract	GEO	GEO:GPL570 (Affymetrix HGU133+2)
GSM887609	GSE36133	SNU-1214	upper_aerodigestive_tract	GEO	GEO:GPL570 (Affymetrix HGU133+2)
GSM887629	GSE36133	SNU-46	upper_aerodigestive_tract	GEO	GEO:GPL570 (Affymetrix HGU133+2)
GSM887642	GSE36133	SNU-899	upper_aerodigestive_tract	GEO	GEO:GPL570 (Affymetrix HGU133+2)
GSM887743	GSE36133	YD-10B	upper_aerodigestive_tract	GEO	GEO:GPL570 (Affymetrix HGU133+2)
GSM887745	GSE36133	YD-38	upper_aerodigestive_tract	GEO	GEO:GPL570 (Affymetrix HGU133+2)
GSM887746	GSE36133	YD-8	upper_aerodigestive_tract	GEO	GEO:GPL570 (Affymetrix HGU133+2)
GSM886840	GSE36133	5637	urinary_tract	GEO	GEO:GPL570 (Affymetrix HGU133+2)
GSM886841	GSE36133	639-V	urinary_tract	GEO	GEO:GPL570 (Affymetrix HGU133+2)
GSM886842	GSE36133	647-V	urinary_tract	GEO	GEO:GPL570 (Affymetrix HGU133+2)
GSM886873	GSE36133	BC-3C	urinary_tract	GEO	GEO:GPL570 (Affymetrix HGU133+2)
GSM886879	GSE36133	BFTC-905	urinary_tract	GEO	GEO:GPL570 (Affymetrix HGU133+2)
GSM886908	GSE36133	CAL-29	urinary_tract	GEO	GEO:GPL570 (Affymetrix HGU133+2)
GSM887092	GSE36133	Hs 172.T	urinary_tract	GEO	GEO:GPL570 (Affymetrix HGU133+2)
GSM887138	GSE36133	HT-1197	urinary_tract	GEO	GEO:GPL570 (Affymetrix HGU133+2)
GSM887139	GSE36133	HT-1376	urinary_tract	GEO	GEO:GPL570 (Affymetrix HGU133+2)
GSM887167	GSE36133	J82	urinary_tract	GEO	GEO:GPL570 (Affymetrix HGU133+2)
GSM887187	GSE36133	JMSU-1	urinary_tract	GEO	GEO:GPL570 (Affymetrix HGU133+2)
GSM887213	GSE36133	KMBC-2	urinary_tract	GEO	GEO:GPL570 (Affymetrix HGU133+2)
GSM887243	GSE36133	KU-19-19	urinary_tract	GEO	GEO:GPL570 (Affymetrix HGU133+2)
GSM887551	GSE36133	RT112/84	urinary_tract	GEO	GEO:GPL570 (Affymetrix HGU133+2)
GSM887552	GSE36133	RT-112	urinary_tract	GEO	GEO:GPL570 (Affymetrix HGU133+2)
GSM887553	GSE36133	RT4	urinary_tract	GEO	GEO:GPL570 (Affymetrix HGU133+2)
GSM887557	GSE36133	SCaBER	urinary_tract	GEO	GEO:GPL570 (Affymetrix HGU133+2)
GSM887670	GSE36133	SW-1710	urinary_tract	GEO	GEO:GPL570 (Affymetrix HGU133+2)
GSM887678	GSE36133	SW 780	urinary_tract	GEO	GEO:GPL570 (Affymetrix HGU133+2)
GSM887683	GSE36133	T24	urinary_tract	GEO	GEO:GPL570 (Affymetrix HGU133+2)
GSM887729	GSE36133	UM-UC-3	urinary_tract	GEO	GEO:GPL570 (Affymetrix HGU133+2)
GSM887732	GSE36133	VM-CUB1	urinary_tract	GEO	GEO:GPL570 (Affymetrix HGU133+2)
