# Supplementary material for: Immune and Stromal Classification of Colorectal Cancer Is Associated with Molecular Subtypes and Relevant for Precision Immunotherapy
Source: Oxford University Press journal article supplement (doi:10.1158/1078-0432.ccr-15-2879), 2016-03-18
Supplement: 10780432ccr152879-sup-158784_2_supp_3389565_b3kcvw.xlsx [file 10780432ccr152879-sup-158784_2_supp_3389565_b3kcvw.xlsx]

## Sheet: S4
Table S4
Antibody	Specie	Clone	Source	Concentration (ug/mL)	pH Antigen Retrival	Secondary Antibody
CD8	Mouse IgG1	C8/144B	Dako	3.14	High	Anti-mouse EnVision FLEX/HRP labeled polymer
CD68	Mouse IgG3	PG-M1	Dako	0.6	Low
Alpha Smooth Muscle Actin	Mouse IgG2a	1A4	Dako	0.7	Low
