# Supplementary material for: Immune and Stromal Classification of Colorectal Cancer Is Associated with Molecular Subtypes and Relevant for Precision Immunotherapy
Source: Oxford University Press journal article supplement (doi:10.1158/1078-0432.ccr-15-2879), 2016-03-18
Supplement: 10780432ccr152879-sup-158784_2_supp_3389567_d3kcvw.xlsx [file 10780432ccr152879-sup-158784_2_supp_3389567_d3kcvw.xlsx]

## Sheet: S6
Gene Ids		Expression of the markers in molecular subgroups of colorectal cancer in 3 cohorts
		CIT cohort																	CIT Validation cohort																	PETACC3 cohort (probesets are mapped to the corresponding gene symbols)
		Subgroup mean expressions				ANOVA test	Pairwise T tests (p-values)												Subgroup mean expressions				ANOVA test	Pairwise T tests (p-values)												Subgroup mean expressions				ANOVA test	Pairwise T tests (p-values)
SYMBOL	ENTREZID	meanCMS1	meanCMS2	meanCMS3	meanCMS4	p-values	CMS1vsCMS2	CMS1vsCMS3	CMS1vsCMS4	CMS2vsCMS1	CMS2vsCMS3	CMS2vsCMS4	CMS3vsCMS1	CMS3vsCMS2	CMS3vsCMS4	CMS4vsCMS1	CMS4vsCMS2	CMS4vsCMS3	meanCMS1	meanCMS2	meanCMS3	meanCMS4	p-values	CMS1vsCMS2	CMS1vsCMS3	CMS1vsCMS4	CMS2vsCMS1	CMS2vsCMS3	CMS2vsCMS4	CMS3vsCMS1	CMS3vsCMS2	CMS3vsCMS4	CMS4vsCMS1	CMS4vsCMS2	CMS4vsCMS3	meanCMS1	meanCMS2	meanCMS3	meanCMS4	p-values	CMS1vsCMS2	CMS1vsCMS3	CMS1vsCMS4	CMS2vsCMS1	CMS2vsCMS3	CMS2vsCMS4	CMS3vsCMS1	CMS3vsCMS2	CMS3vsCMS4
TNF	7124	4.14605	4.00129	4.0801	4.16898	0.000135022	0.00267911	0.138623	0.636662	0.997321	0.970917	0.99965	0.861377	0.0290832	0.935658	0.363338	0.00035039	0.064342	5.09225	4.98194	4.97076	5.09708	3.88136e-05	8.74789e-05	0.00131891	0.546369	0.999913	0.372898	0.998962	0.998681	0.627102	0.996856	0.453631	0.00103816	0.00314425	2.72946	2.58056	2.62899	2.6896	0.0835089	0.0185771	0.102761	0.307022	0.981423	0.795638	0.96871	0.897239	0.204362	0.812449
LTA	4049	3.99645	4.01665	4.05477	4.01888	0.599681	0.710823	0.907727	0.707608	0.289177	0.863511	0.528616	0.0922734	0.136489	0.182608	0.292392	0.471384	0.817392	4.66667	4.70482	4.74569	4.68257	0.10877	0.942945	0.98253	0.702819	0.0570547	0.880222	0.203451	0.0174702	0.119778	0.0530534	0.297181	0.796549	0.946947	NA	NA	NA	NA	NA	NA	NA	NA	NA	NA	NA	NA	NA	NA
TNFRSF1A	7132	8.60547	8.41468	8.28075	8.76802	6.24862e-15	0.000477845	1.78192e-06	0.991736	0.999522	0.00549236	1	0.999998	0.994508	1	0.00826447	7.94265e-11	9.01569e-13	8.7288	8.47667	8.38197	8.67641	6.61809e-10	4.42816e-07	1.3284e-07	0.187962	1	0.0438017	0.999956	1	0.956198	0.999995	0.812038	4.39423e-05	4.81636e-06	5.39804	5.25439	5.17053	5.42716	0.00303001	0.02161	0.00440391	0.65099	0.97839	0.131074	0.997256	0.995596	0.868926	0.999312
TNFRSF1B	7133	7.50864	7.24722	6.9757	7.47251	5.71656e-11	0.000223251	3.0092e-09	0.335815	0.999777	3.0247e-05	0.99974	1	0.99997	1	0.664185	0.000259714	1.62983e-09	7.1721	6.8331	6.65506	7.02277	1.95579e-08	6.28562e-07	1.16369e-07	0.026093	0.999999	0.0231198	0.996043	1	0.97688	0.999907	0.973907	0.00395726	9.28288e-05	4.65541	4.56031	4.57308	4.621	0.0600852	0.00835338	0.0600489	0.203675	0.991647	0.611322	0.973636	0.939951	0.388678	0.845194
VEGFA	7422	8.35232	8.45978	8.34174	8.35407	0.274752	0.915071	0.45856	0.506566	0.0849288	0.0735997	0.111451	0.54144	0.9264	0.545307	0.493434	0.888549	0.454693	8.5737	8.59461	8.60911	8.46464	0.24905	0.629114	0.649039	0.0866454	0.370886	0.567551	0.0349306	0.350961	0.432449	0.0712444	0.913355	0.965069	0.928756	6.27858	6.19686	6.05863	6.0611	0.0142165	0.117098	0.00535478	0.00302345	0.882902	0.0297617	0.0183382	0.994645	0.970238	0.512014
VEGFB	7423	6.06836	6.18507	5.90058	6.51886	2.79285e-15	0.968653	0.0213704	1	0.0313472	3.57456e-05	1	0.97863	0.999964	1	1.11503e-09	4.11084e-09	2.62442e-13	6.21989	6.31393	5.98669	6.51375	4.27745e-12	0.971858	0.000267977	0.999998	0.0281422	2.273e-07	0.999794	0.999732	1	1	1.77739e-06	0.000205996	6.78057e-12	6.42588	6.53074	6.23866	6.82256	1.01736e-17	0.953234	0.0129588	1	0.046766	2.46949e-05	1	0.987041	0.999975	1
VEGFC	7424	5.68077	5.07131	4.64557	6.47471	1.2677e-80	7.14926e-13	4.07909e-22	1	1	1.71302e-09	1	1	1	1	1.02369e-13	3.00024e-37	8.93488e-45	5.72254	5.25698	5.0579	6.36391	6.17664e-63	1.51113e-14	3.24489e-18	1	1	0.000174848	1	1	0.999825	1	9.10239e-14	2.66951e-31	1.75878e-34	2.14434	2.0534	2.21766	2.16817	0.00131967	0.0219997	0.870538	0.688221	0.978	0.997607	0.998794	0.129462	0.00239281	0.205188
EGF	1950	3.25493	3.25244	3.66186	3.0509	0.000876829	0.492232	0.989791	0.0679146	0.507768	0.996991	0.0206429	0.0102091	0.00300942	6.06371e-05	0.932085	0.979357	0.999939	4.00553	3.98731	4.18928	3.89152	0.111059	0.416766	0.928723	0.118157	0.583234	0.957603	0.129225	0.071277	0.042397	0.00868426	0.881843	0.870775	0.991316	2.03073	2.03755	1.89947	1.76787	0.00815779	0.523754	0.14124	0.00602902	0.476246	0.0757348	7.35299e-05	0.85876	0.924265	0.0550651
PDGFA	5154	6.19945	6.03199	5.81645	6.22235	2.56223e-06	0.0067032	1.90906e-05	0.620527	0.993297	0.00346296	0.999132	0.999981	0.996537	0.999998	0.379473	0.000867514	2.41835e-06	6.25274	6.23473	6.14639	6.34637	0.300032	0.411033	0.165484	0.855394	0.588967	0.185428	0.932371	0.834516	0.814572	0.970182	0.144606	0.067629	0.0298183	5.14501	5.35446	5.15035	5.45587	1.94854e-09	0.999968	0.53375	1	3.16642e-05	0.00016136	0.993871	0.46625	0.999839	1
PDGFB	5155	5.05366	5.00803	4.94811	5.17023	2.749e-12	0.0456315	0.000773229	0.999705	0.954368	0.0100403	1	0.999227	0.98996	1	0.000295229	2.83627e-09	6.53027e-11	5.22725	5.22283	5.21354	5.33575	1.33829e-07	0.402362	0.302189	0.999983	0.597638	0.351791	0.999998	0.697811	0.648209	0.999952	1.65247e-05	1.69012e-06	4.78143e-05	3.02305	2.7623	2.73154	3.1975	8.91047e-09	0.00899942	0.00919588	0.921658	0.991001	0.344271	1	0.990804	0.655729	0.999999
PDGFC	56034	6.23333	6.02971	5.48872	7.61629	9.41945e-55	0.0265727	2.02665e-08	1	0.973427	5.71042e-07	1	1	0.999999	1	2.15489e-21	1.42423e-32	8.27076e-36	6.38716	6.23831	5.89508	7.62944	4.65859e-40	0.0710444	9.40486e-05	1	0.928956	0.0015984	1	0.999906	0.998402	1	7.06483e-22	4.03482e-31	8.06339e-26	3.25238	3.14046	3.09192	3.58381	2.0526e-39	0.00402243	0.000487767	1	0.995978	0.0716736	1	0.999512	0.928326	1
MBL2	4153	2.73967	2.70084	2.71882	2.88432	0.00337714	0.0637657	0.284505	0.952804	0.936234	0.702663	0.983809	0.715495	0.297337	0.96798	0.0471955	0.016191	0.0320199	3.24987	3.21278	3.23687	3.20688	0.010722	0.0030975	0.229863	0.00507412	0.996903	0.939378	0.339956	0.770137	0.060622	0.0509534	0.994926	0.660044	0.949047	NA	NA	NA	NA	NA	NA	NA	NA	NA	NA	NA	NA	NA	NA
FCN1	2219	4.78223	4.33506	4.14339	5.24207	8.37147e-34	4.27395e-07	6.8254e-11	0.999781	1	8.39713e-05	1	1	0.999916	1	0.000218718	1.71442e-14	3.45102e-18	5.20893	4.88183	4.77687	5.52681	6.24683e-26	4.79705e-07	3.94153e-09	0.999754	1	0.00960879	1	1	0.990391	1	0.000246081	3.38536e-15	2.85821e-17	3.85786	3.62972	3.85799	4.07716	4.82267e-17	2.49843e-05	0.500764	0.999584	0.999975	0.999935	1	0.499236	6.48967e-05	0.999318
FCN2	2220	3.65993	3.72966	3.7464	3.69497	0.00699264	0.998682	0.998486	0.871288	0.00131816	0.763111	0.0915951	0.0015135	0.236889	0.0508532	0.128712	0.908405	0.949147	4.46006	4.45778	4.49699	4.42925	0.0464794	0.448219	0.948322	0.0824309	0.551781	0.978207	0.064042	0.0516777	0.0217933	0.0022547	0.917569	0.935958	0.997745	NA	NA	NA	NA	NA	NA	NA	NA	NA	NA	NA	NA	NA	NA
FCN3	8547	4.64491	4.54143	4.35356	4.66322	1.10658e-05	0.0160713	8.44577e-07	0.600339	0.983929	7.643e-05	0.970773	0.999999	0.999924	0.999985	0.399661	0.0292272	1.52473e-05	5.46291	5.30188	5.17283	5.34042	1.27071e-07	9.39896e-06	3.66862e-09	0.0017233	0.999991	0.00208988	0.837781	1	0.99791	0.999672	0.998277	0.162219	0.000328384	2.88477	2.84675	2.95682	2.83194	0.0856503	0.229774	0.872018	0.161983	0.770226	0.985697	0.341971	0.127982	0.0143031	0.00870346
MASP1	5648	4.28177	4.33526	4.31347	4.50945	1.54632e-11	0.988962	0.858991	0.999999	0.0110382	0.171397	0.999971	0.141009	0.828603	0.999985	8.35461e-07	2.9327e-05	1.50271e-05	4.49158	4.53438	4.532	4.57224	0.000673514	0.999163	0.99416	0.99938	0.00083695	0.435852	0.943602	0.00583977	0.564148	0.944424	0.000619912	0.0563977	0.0555758	2.52975	2.69766	2.68256	3.17664	2.73385e-10	0.986545	0.949667	1	0.0134551	0.427042	0.999999	0.0503335	0.572958	0.999992
MASP2	10747	4.42918	4.50871	4.54792	4.49483	0.00799003	0.999805	0.999976	0.9295	0.000195265	0.954626	0.368207	2.38736e-05	0.0453737	0.119499	0.0704997	0.631793	0.880501	5.01204	5.03909	5.06541	4.98297	0.0011498	0.96308	0.985606	0.0757921	0.03692	0.872907	0.00174286	0.0143944	0.127093	0.00122242	0.924208	0.998257	0.998778	4.11952	4.43302	4.02489	4.31688	0.000146684	0.998816	0.20966	0.965359	0.00118424	1.30472e-05	0.0797572	0.79034	0.999987	0.997815
C1QA	712	8.34012	7.27661	7.2565	8.61147	1.60285e-35	1.5877e-12	1.88892e-10	0.959933	1	0.431682	1	1	0.568318	1	0.0400666	7.25298e-26	3.27152e-18	8.77261	7.47269	7.63075	8.65456	3.71399e-30	8.90198e-19	7.68233e-10	0.219378	1	0.859982	1	1	0.140018	1	0.780622	1.21841e-18	6.01053e-09	5.70803	5.06669	5.04755	5.78287	2.77304e-28	5.14563e-11	5.69908e-09	0.779683	1	0.41038	1	1	0.58962	1
C1QB	713	8.43774	7.17976	7.07066	8.57861	1.9339e-37	1.62505e-14	5.57019e-13	0.799587	1	0.200002	1	1	0.799998	1	0.200413	9.80187e-24	5.39339e-18	8.52458	7.09089	7.19791	8.3528	2.38305e-31	1.39628e-19	1.17144e-10	0.143714	1	0.745888	1	1	0.254112	1	0.856286	4.63453e-19	2.47815e-09	6.94034	5.94054	5.69845	6.92325	1.2956e-28	6.07709e-11	2.96288e-12	0.454586	1	0.0260161	1	1	0.973984	1
C1QC	714	8.86199	7.83151	7.78502	9.15223	3.48144e-33	2.1352e-12	1.22497e-09	0.969682	1	0.362185	1	1	0.637815	1	0.030318	4.27499e-24	9.4236e-16	9.06157	7.82456	7.91419	8.95424	7.15877e-27	7.15429e-18	1.18269e-09	0.236928	1	0.718981	1	1	0.281019	1	0.763072	8.4072e-17	1.07966e-08	NA	NA	NA	NA	NA	NA	NA	NA	NA	NA	NA	NA	NA	NA
C1R	715	8.71229	8.32527	7.75506	10.0434	1.03637e-73	0.000102392	3.38211e-12	1	0.999898	9.36598e-08	1	1	1	1	3.39302e-24	3.71377e-54	1.3372e-41	8.73224	8.16243	7.79704	9.63081	1.42444e-49	1.07508e-09	1.10557e-11	1	1	0.000967324	1	1	0.999033	1	6.89189e-16	3.87318e-37	6.88784e-27	7.57509	7.28411	7.17031	8.19694	2.93219e-54	5.35654e-05	8.83084e-06	1	0.999946	0.06436	1	0.999991	0.93564	1
C1S	716	8.46629	8.12538	7.37089	10.0414	1.42043e-68	0.0018703	2.31076e-12	1	0.99813	4.63174e-09	1	1	1	1	1.12513e-26	5.28108e-55	1.25569e-41	8.30485	7.82551	7.32146	9.41742	2.79087e-34	0.0001168	1.34153e-08	1	0.999883	0.00053148	1	1	0.999469	1	2.64035e-13	4.84279e-27	1.47232e-23	3.87315	3.69526	3.71383	4.23287	1.02723e-28	0.000948202	0.0204098	1	0.999052	0.610749	1	0.97959	0.389251	1
C2	717	5.50951	5.79158	5.45801	5.77023	6.26111e-05	0.999251	0.324642	0.994591	0.000749021	0.000230082	0.390726	0.675358	0.99977	0.998179	0.00540901	0.609274	0.00182095	5.92057	6.02515	5.90404	5.8371	0.0199979	0.9455	0.425024	0.124678	0.0545003	0.0553612	0.000576539	0.574976	0.944639	0.206598	0.875322	0.999423	0.793402	2.64965	2.77552	2.81075	2.69096	0.00181526	0.998117	0.997145	0.81629	0.0018825	0.765896	0.0063113	0.0028552	0.234104	0.0103306
CFB	629	6.78257	6.70973	6.66449	6.6634	0.569596	0.174352	0.123443	0.104038	0.825648	0.303154	0.279244	0.876557	0.696846	0.495761	0.895962	0.720756	0.504239	7.22934	7.07615	7.24488	6.90069	0.000445206	0.0331637	0.562802	0.000188871	0.966836	0.98269	0.00597603	0.437198	0.01731	6.63882e-05	0.999811	0.994024	0.999934	5.14216	5.04563	4.97543	5.07187	0.387271	0.12152	0.050589	0.217849	0.87848	0.188391	0.658273	0.949411	0.811609	0.865117
CFD	1675	7.8034	6.5654	7.55279	7.69913	2.42462e-24	1.3326e-15	0.108057	0.271663	1	1	1	0.891943	8.52755e-08	0.766424	0.728337	3.60375e-14	0.233576	7.55669	6.43352	7.3261	7.4953	6.61194e-23	1.37468e-19	0.102683	0.338176	1	0.999999	1	0.897317	8.97333e-07	0.8066	0.661824	3.47851e-13	0.1934	5.51987	4.86326	5.24857	5.51494	5.72321e-13	1.523e-08	0.0391407	0.484309	1	0.998245	1	0.960859	0.00175501	0.969125
C3	718	9.02451	8.47479	7.84118	10.6726	3.64342e-48	0.000800226	2.06536e-08	1	0.9992	5.91208e-05	1	1	0.999941	1	5.96944e-16	6.28922e-40	1.95078e-33	8.91223	8.2493	7.90668	10.0212	2.23839e-33	4.02289e-06	8.02539e-08	1	0.999996	0.0170514	1	1	0.982949	1	1.17674e-11	5.24684e-30	2.70311e-22	4.53858	4.16086	4.17249	5.12588	7.34407e-41	7.70003e-06	0.000122229	1	0.999992	0.562956	1	0.999878	0.437044	1
C5	727	5.07107	4.76513	4.69555	4.83461	0.00478948	0.00275221	0.00102066	0.0496192	0.997248	0.176081	0.739471	0.998979	0.823919	0.877074	0.950381	0.260529	0.122926	5.02685	4.92322	5.0848	4.91505	0.15401	0.0980469	0.706359	0.0994447	0.901953	0.966102	0.447073	0.293641	0.0338978	0.0363749	0.900555	0.552927	0.963625	3.21379	2.97639	2.9871	3.02235	0.0223566	0.00594568	0.0195717	0.0239865	0.994054	0.55448	0.784147	0.980428	0.44552	0.6668
C6	729	4.0554	4.15441	4.16306	4.33396	0.00346345	0.973616	0.960698	0.995878	0.0263838	0.572668	0.967252	0.0393018	0.427332	0.951622	0.0041221	0.0327481	0.0483776	4.41601	4.53165	4.50503	4.56097	0.0101248	0.999209	0.970155	0.99068	0.000791054	0.252325	0.700405	0.0298447	0.747675	0.811381	0.00932036	0.299595	0.188619	NA	NA	NA	NA	NA	NA	NA	NA	NA	NA	NA	NA	NA	NA
C7	730	3.87476	3.8884	3.93712	5.11462	4.9212e-56	0.582358	0.786529	1	0.417642	0.816643	1	0.213471	0.183357	1	4.04288e-20	2.9272e-21	1.65393e-19	4.42321	4.44972	4.38621	5.16858	1.34835e-28	0.722166	0.253425	1	0.277834	0.0855226	1	0.746575	0.914477	1	9.67414e-12	1.2549e-11	1.91003e-12	2.99752	2.95758	3.00777	3.57539	1.14131e-35	0.241269	0.557889	1	0.758731	0.816443	1	0.442111	0.183557	1
C8A	731	3.18887	3.2158	3.25605	3.23817	0.654869	0.794546	0.947026	0.752563	0.205454	0.886581	0.629216	0.0529738	0.113419	0.402479	0.247437	0.370784	0.597521	4.43552	4.44631	4.46339	4.3882	0.0345091	0.701516	0.845061	0.0294615	0.298484	0.744556	0.00685027	0.154939	0.255444	0.00616941	0.970539	0.99315	0.993831	1.91963	1.93162	2.04757	1.88831	0.0216777	0.601056	0.976392	0.267923	0.398944	0.983557	0.118477	0.0236078	0.0164434	0.00297587
C8B	732	4.21166	4.29941	4.37902	4.39841	0.0115832	0.983013	0.999705	0.987566	0.0169867	0.984481	0.901163	0.000295018	0.0155186	0.595359	0.012434	0.0988374	0.404641	5.32498	5.43939	5.42277	5.39222	0.00054853	0.99999	0.997761	0.977978	1.00556e-05	0.304235	0.0701101	0.00223868	0.695765	0.212042	0.0220219	0.92989	0.787958	NA	NA	NA	NA	NA	NA	NA	NA	NA	NA	NA	NA	NA	NA
C8G	733	4.27314	3.93648	4.00459	3.93913	6.8335e-05	0.000295107	0.00485546	0.00373351	0.999705	0.903841	0.512195	0.995145	0.0961589	0.245026	0.996266	0.487805	0.754974	4.62749	4.34138	4.52612	4.37877	8.93134e-08	4.23826e-06	0.135101	0.00026553	0.999996	0.993912	0.820985	0.864899	0.00608814	0.0331412	0.999734	0.179015	0.966859	2.79972	2.75761	2.96037	2.79884	0.00246507	0.216104	0.990365	0.49388	0.783896	0.999819	0.844001	0.00963471	0.000180694	0.00324885
C9	735	2.68283	2.6373	2.7112	2.74836	0.209901	0.0842334	0.765679	0.750859	0.915767	0.991239	0.881422	0.234321	0.00876117	0.650681	0.249141	0.118578	0.349319	3.16083	3.14183	3.14839	3.11561	0.0447702	0.094917	0.268702	0.00333038	0.905083	0.643115	0.0276448	0.731298	0.356885	0.0480569	0.99667	0.972355	0.951943	NA	NA	NA	NA	NA	NA	NA	NA	NA	NA	NA	NA	NA	NA
SERPING1	710	7.98931	7.09167	6.436	9.14868	8.44216e-76	1.83521e-10	1.8456e-18	1	1	3.01285e-08	1	1	1	1	1.3169e-13	4.00434e-51	7.24581e-45	8.31148	7.33377	6.97254	8.99524	1.37785e-54	7.40354e-17	1.93993e-18	1	1	0.000901054	1	1	0.999099	1	1.14127e-08	5.61765e-41	2.9831e-31	5.89515	5.35943	5.15536	6.48307	8.44066e-61	5.21216e-08	1.79502e-10	1	1	0.00472557	1	1	0.995274	1
C4BPA	722	5.77482	6.22964	6.58538	5.88538	0.000264644	0.999035	0.999971	0.714322	0.000965221	0.976559	0.0269281	2.91133e-05	0.023441	0.000893604	0.285678	0.973072	0.999106	6.29029	6.67036	6.73683	6.30256	0.000181652	0.999884	0.998175	0.540058	0.000115817	0.673165	0.00126625	0.00182523	0.326835	0.00432446	0.459942	0.998734	0.995676	3.50021	3.59634	3.73803	3.49664	0.00189425	0.941577	0.997547	0.476491	0.058423	0.97323	0.0133408	0.002453	0.0267697	0.000576101
C4BPB	725	6.90471	6.32742	7.57056	6.57049	1.53867e-21	3.62001e-06	0.999987	0.0193998	0.999996	1	0.975198	1.34725e-05	1.44351e-18	5.13646e-10	0.9806	0.0248017	1	6.83584	6.04353	7.11915	6.21714	7.35931e-22	1.33614e-13	0.971685	2.6797e-06	1	1	0.943172	0.0283147	2.41038e-12	2.46663e-08	0.999997	0.056828	1	5.21979	4.64187	5.3198	4.77427	8.45378e-28	3.15605e-11	0.815163	2.46645e-07	1	1	0.997554	0.184837	7.00099e-12	1.81444e-08
CFH	3075	5.79076	4.96632	4.5637	6.86141	7.61454e-68	3.53265e-10	2.62144e-15	1	1	2.02108e-05	1	1	0.99998	1	1.23428e-11	1.88688e-36	7.58334e-40	6.24855	5.50083	5.33999	7.06914	7.64545e-59	1.06578e-13	3.19495e-14	1	1	0.0258612	1	1	0.974139	1	5.00383e-12	8.09294e-38	7.65174e-34	2.65442	2.4751	2.56811	2.92864	3.35794e-37	7.93139e-06	0.0344748	1	0.999992	0.995946	1	0.965525	0.00405376	1
CFHR2	3080	4.21423	4.0258	3.9158	4.56445	8.34818e-24	7.04583e-05	2.22501e-07	0.999921	0.99993	0.00285398	1	1	0.997146	1	7.88876e-05	6.62052e-10	4.3608e-12	4.41159	4.28666	4.2404	4.45905	2.78442e-13	2.32576e-06	2.60799e-08	0.932646	0.999998	0.034459	1	1	0.965541	1	0.0673537	1.50212e-09	2.65532e-11	1.41512	1.41981	1.48396	1.38118	0.0426838	0.553273	0.94495	0.167563	0.446727	0.967442	0.0554661	0.0550503	0.0325576	0.00181798
CFHR3	10878	2.83009	2.83174	2.81658	2.87149	0.394351	0.533522	0.281621	0.818103	0.466478	0.211228	0.819788	0.718379	0.788772	0.88694	0.181897	0.180212	0.11306	3.22199	3.24294	3.24229	3.22836	0.136176	0.989173	0.930812	0.721158	0.0108271	0.480867	0.0891024	0.0691881	0.519133	0.173892	0.278842	0.910898	0.826108	NA	NA	NA	NA	NA	NA	NA	NA	NA	NA	NA	NA	NA	NA
CFHR4	10877	3.01219	3.09522	3.06526	3.16466	0.167616	0.982709	0.851925	0.954855	0.0172913	0.255598	0.788186	0.148075	0.744402	0.858299	0.0451453	0.211814	0.141701	3.69305	3.73131	3.70109	3.73851	0.232118	0.961343	0.618505	0.962458	0.0386566	0.130239	0.611041	0.381495	0.869761	0.893686	0.0375418	0.388959	0.106314	NA	NA	NA	NA	NA	NA	NA	NA	NA	NA	NA	NA	NA	NA
CFHR5	81494	2.55026	2.5817	2.62872	2.64225	0.250196	0.865169	0.970831	0.901025	0.134831	0.90699	0.812799	0.0291694	0.0930103	0.572308	0.0989753	0.187201	0.427692	3.17681	3.17639	3.2203	3.14751	0.0126106	0.489536	0.977859	0.0690806	0.510464	0.990053	0.0406966	0.0221407	0.00994657	0.000531253	0.930919	0.959303	0.999469	NA	NA	NA	NA	NA	NA	NA	NA	NA	NA	NA	NA	NA	NA
CFI	3426	6.42643	6.05039	6.68704	7.22121	2.20625e-15	0.00317191	0.890725	1	0.996828	0.999406	1	0.109275	0.000593953	0.995067	3.49709e-07	9.41542e-18	0.00493269	6.35234	6.04479	6.59991	6.93731	2.07298e-08	0.0103134	0.851349	0.999973	0.989687	0.991435	1	0.148651	0.00856472	0.924512	2.66303e-05	1.06712e-11	0.075488	2.87556	2.64951	2.62515	3.07548	8.01092e-18	0.00048409	0.000421066	0.99732	0.999516	0.32066	1	0.999579	0.67934	1
CFP	5199	4.34369	4.22487	4.17714	4.41595	2.53468e-05	0.00759116	0.00212672	0.862108	0.992409	0.138797	0.999668	0.997873	0.861203	0.999895	0.137892	0.000332268	0.000105257	4.68222	4.70583	4.68105	4.80592	0.00219847	0.802273	0.487483	0.9988	0.197727	0.238833	0.995432	0.512517	0.761167	0.996725	0.00120037	0.00456839	0.00327497	4.52412	4.34398	4.55071	4.53137	0.000812977	0.00514843	0.619249	0.535635	0.994852	0.998388	0.998963	0.380751	0.00161226	0.405396
CLU	1191	5.45772	5.04275	4.86287	6.3384	1.60579e-44	8.1851e-06	2.38842e-07	1	0.999992	0.0201006	1	1	0.979899	1	1.13233e-11	1.92259e-25	2.87456e-25	5.68345	5.4953	5.27219	6.39865	1.41924e-25	0.0083288	1.39858e-05	1	0.991671	0.00308491	1	0.999986	0.996915	1	1.97666e-09	6.9178e-15	1.80015e-17	2.74266	2.62522	2.58459	3.451	8.23724e-32	0.0990537	0.0651865	1	0.900946	0.279659	1	0.934814	0.720341	1
CR1	1378	3.93148	3.68069	3.6653	4.068	1.22236e-31	4.09048e-08	1.659e-08	0.990355	1	0.218576	1	1	0.781424	1	0.00964485	1.34243e-15	4.90777e-16	4.37142	4.10867	4.1182	4.50102	2.41107e-28	6.41115e-13	3.79888e-10	0.991064	1	0.647205	1	1	0.352795	1	0.00893645	9.18845e-14	2.05523e-12	1.86158	1.88513	1.99574	1.8844	0.0352495	0.716475	0.99481	0.695075	0.283525	0.994919	0.491279	0.00519009	0.0050808	0.00816476
CR1L	1379	3.50371	3.48007	3.51924	3.4771	0.35352	0.157338	0.696755	0.152163	0.842662	0.932131	0.443951	0.303245	0.0678688	0.0689803	0.847837	0.556049	0.93102	3.60617	3.56133	3.58866	3.5495	0.0322061	0.00774228	0.242932	0.00558948	0.992258	0.87836	0.278215	0.757068	0.12164	0.0696654	0.994411	0.721785	0.930335	NA	NA	NA	NA	NA	NA	NA	NA	NA	NA	NA	NA	NA	NA
CD46	4179	9.75568	10.2238	10.0986	9.83689	1.05503e-10	1	0.999945	0.793247	3.90309e-09	0.0330561	3.9657e-06	5.4669e-05	0.966944	0.00267517	0.206753	0.999996	0.997325	10.0517	10.4971	10.2923	10.0426	7.11879e-12	1	0.995108	0.458433	9.93813e-11	0.00902828	4.7328e-08	0.00489243	0.990972	0.00793865	0.541567	1	0.992061	7.9579	8.13507	8.05701	7.93251	1.53606e-06	0.999955	0.946831	0.307094	4.46933e-05	0.0748464	8.01184e-07	0.0531691	0.925154	0.0184509
CD55	1604	10.0345	8.81311	10.1496	9.41124	1.63059e-32	3.41374e-14	0.754491	0.000113213	1	1	1	0.245509	9.67485e-21	2.96785e-07	0.999887	1.48489e-07	1	10.4819	9.0581	10.4482	9.84853	1.94526e-35	1.49398e-23	0.422357	1.43189e-05	1	1	1	0.577643	2.2878e-14	0.000275312	0.999986	1.14901e-10	0.999725	5.79279	4.85887	5.57137	5.36576	2.60324e-28	1.08377e-12	0.0602585	0.000350632	1	1	1	0.939741	3.05192e-11	0.026204
CD59	966	8.62617	8.36003	8.35924	8.94174	2.08241e-26	2.11811e-05	0.000229368	0.999995	0.999979	0.494345	1	0.999771	0.505655	1	4.606e-06	7.03379e-26	1.21504e-16	8.72654	8.56274	8.50198	8.97121	6.91118e-11	0.00626927	0.00359538	0.999593	0.993731	0.185612	1	0.996405	0.814388	1	0.000407083	1.88602e-12	3.8918e-09	5.04756	4.9259	4.77732	5.23402	6.73617e-23	0.0107081	5.99501e-06	0.999653	0.989292	0.000239852	1	0.999994	0.99976	1
C1QBP	708	10.5193	9.82259	10.0426	9.54906	1.29905e-27	1.15672e-20	3.83592e-07	1.52931e-24	1	0.99547	8.82195e-05	1	0.00452972	4.21136e-07	1	0.999912	1	10.7717	10.0931	10.313	9.89106	1.09936e-23	3.12643e-22	2.06238e-05	4.16983e-18	1	0.981844	0.0106412	0.999979	0.018156	0.000340076	1	0.989359	0.99966	7.51507	7.38511	7.2064	7.33635	0.0485724	0.0541425	0.00556586	0.0208629	0.945857	0.051493	0.246223	0.994434	0.948507	0.872436
CALR	811	9.10849	8.88906	8.95491	8.87774	3.54536e-07	7.87387e-07	0.00352635	1.04883e-05	0.999999	0.929541	0.388361	0.996474	0.0704592	0.0754645	0.99999	0.611639	0.924535	9.02322	8.81046	8.89467	8.80394	2.92987e-08	3.79197e-08	0.0104208	6.5376e-07	1	0.953859	0.430018	0.989579	0.0461407	0.0480132	0.999999	0.569982	0.951987	4.84089	4.8767	4.98163	4.9102	0.0377219	0.762461	0.992678	0.909645	0.237539	0.995077	0.853508	0.00732155	0.00492263	0.0452543
C3AR1	719	8.05466	7.1035	6.89436	8.31089	2.46473e-54	7.03323e-17	1.4821e-20	0.981108	1	0.00114918	1	1	0.998851	1	0.0188923	4.21796e-26	1.29274e-29	7.10368	6.3733	6.36514	7.30708	7.78644e-39	1.45385e-17	2.98795e-12	0.98474	1	0.458707	1	1	0.541293	1	0.0152601	3.8647e-25	1.75406e-17	3.9205	3.49677	3.41058	4.13993	5.59045e-35	2.60848e-08	2.88671e-09	0.995903	1	0.0626516	1	1	0.937348	1
C5AR1	728	7.06198	5.86232	5.62459	7.39116	6.70683e-62	1.03712e-18	2.04449e-20	0.99072	1	0.0060185	1	1	0.993982	1	0.00928048	2.00111e-31	1.18614e-30	6.13447	5.13107	4.99853	6.56539	2.83549e-48	1.22044e-18	3.51016e-16	0.99964	1	0.0887452	1	1	0.911255	1	0.000360426	4.28799e-29	1.24391e-24	3.74538	3.74714	3.95747	3.83353	0.000268441	0.514645	0.997903	0.952889	0.485355	0.99933	0.987027	0.00209691	0.000670316	0.0337976
C5AR2	27202	3.16077	3.14788	3.20217	3.16475	0.226085	0.307791	0.896816	0.553327	0.692209	0.979607	0.774348	0.103184	0.0203927	0.108055	0.446673	0.225652	0.891945	3.66478	3.67983	3.64775	3.68654	0.238008	0.854616	0.186956	0.886018	0.145384	0.0427991	0.650346	0.813044	0.957201	0.96323	0.113982	0.349654	0.0367703	NA	NA	NA	NA	NA	NA	NA	NA	NA	NA	NA	NA	NA	NA
CR2	1380	3.28378	3.05367	3.0778	3.2325	1.94539e-05	0.000408723	0.00321171	0.262395	0.999591	0.699642	0.99923	0.996788	0.300358	0.991366	0.737605	0.000769879	0.00863409	3.97426	3.86003	3.92326	4.10936	0.000250793	0.0118232	0.228506	0.949815	0.988177	0.866592	0.999602	0.771494	0.133408	0.984022	0.0501847	0.000397746	0.015978	2.5934	2.2327	2.39769	2.71852	2.05584e-05	0.0070353	0.134256	0.768223	0.992965	0.915191	0.999991	0.865744	0.0848094	0.983205
ITGAM	3684	5.52721	4.98016	4.88756	5.73982	2.12281e-66	1.92027e-21	3.50484e-24	0.999664	1	0.00619403	1	1	0.993806	1	0.000336335	5.2315e-32	2.13767e-34	5.52739	5.03135	5.07066	5.72418	1.81971e-58	2.5538e-24	2.17902e-14	0.999936	1	0.813873	1	1	0.186127	1	6.35692e-05	9.67201e-37	2.79787e-23	2.53941	2.19183	2.04182	2.71859	3.19244e-20	5.09173e-05	6.20477e-07	0.965501	0.999949	0.0119683	1	0.999999	0.988032	1
ITGAX	3687	4.80472	4.50003	4.50659	4.78461	2.07329e-30	1.14486e-14	4.97702e-12	0.329209	1	0.595131	1	1	0.404869	1	0.670791	1.21516e-13	5.51077e-11	5.40944	5.15193	5.16698	5.43167	4.76213e-31	4.31311e-16	2.1851e-10	0.741093	1	0.703098	1	1	0.296902	1	0.258907	4.1414e-20	1.65839e-12	4.65819	4.14093	4.28812	4.6154	7.12525e-13	1.58374e-08	0.00198539	0.322124	1	0.911951	1	0.998015	0.0880492	0.997874
ITGB2	3689	6.78684	5.91085	5.80683	6.97319	6.3877e-54	1.39814e-18	1.95769e-18	0.962066	1	0.068091	1	1	0.931909	1	0.0379345	2.85459e-27	1.48894e-25	6.86477	6.03539	6.02994	6.89133	2.14748e-43	1.40628e-24	2.61186e-16	0.616844	1	0.470679	1	1	0.529321	1	0.383156	7.60093e-22	4.88176e-16	5.03321	4.69698	4.60322	5.13558	3.80771e-40	3.31046e-11	3.65557e-12	0.976104	1	0.0173245	1	1	0.982676	1
VSIG4	11326	7.05915	5.90973	5.62293	7.57856	2.94842e-59	4.75668e-17	3.33342e-20	0.999624	1	0.00130923	1	1	0.998691	1	0.000376169	1.36949e-28	3.4518e-31	7.07414	6.11676	5.99637	7.37849	2.22163e-43	8.60129e-18	6.05055e-16	0.990603	1	0.0889938	1	1	0.911006	1	0.00939733	1.3645e-23	1.49853e-21	3.45558	3.07516	2.99981	3.67555	6.51916e-25	4.20073e-07	5.36946e-08	0.993092	1	0.0944141	1	1	0.905586	1
TGFA	7039	5.8595	5.66834	5.74212	5.77285	0.00614507	0.00158031	0.0807824	0.128858	0.99842	0.871685	0.970024	0.919218	0.128315	0.654195	0.871142	0.0299756	0.345805	5.95384	5.93799	5.82783	6.00278	0.120677	0.387451	0.0585872	0.763959	0.612549	0.0523301	0.891615	0.941413	0.94767	0.986757	0.236041	0.108385	0.0132429	3.24314	3.1478	3.27325	3.15189	0.000333077	0.00344602	0.742795	0.00904469	0.996554	0.99939	0.558969	0.257205	0.000609509	0.00181
TGFB1	7040	6.34246	5.84893	5.68968	6.54576	1.16849e-46	2.21199e-14	2.97294e-15	0.998034	1	0.00401468	1	1	0.995985	1	0.0019662	2.99224e-27	7.73156e-24	6.28758	5.83916	5.81647	6.35877	4.01026e-33	2.30955e-18	1.58346e-09	0.905633	1	0.363762	1	1	0.636238	1	0.0943669	2.38748e-23	1.22271e-11	3.82419	3.74553	3.99921	3.82697	4.11006e-06	0.0506027	0.997599	0.521686	0.949397	0.999999	0.986011	0.00240056	7.93872e-07	0.000755573
TGFB2	7042	3.93987	3.91854	3.83126	4.33708	5.26547e-28	0.276676	0.00444714	1	0.723324	0.0010493	1	0.995553	0.998951	1	1.32274e-09	6.96925e-12	1.12005e-14	4.32448	4.26034	4.17907	4.52352	8.34498e-10	0.0704033	0.00130396	0.99873	0.929597	0.00290324	0.999999	0.998696	0.997097	1	0.00126979	1.37064e-06	6.78821e-09	1.62126	1.57105	1.61106	1.80464	3.6129e-07	0.144314	0.433537	0.999131	0.855686	0.79097	1	0.566463	0.20903	0.999319
TGFB3	7043	4.59745	4.40616	4.42234	4.99569	2.01975e-58	6.04242e-08	2.32385e-05	1	1	0.693023	1	0.999977	0.306977	1	4.94124e-16	2.70537e-33	2.55086e-27	4.92017	4.84082	4.84492	5.18393	8.98758e-37	2.6993e-05	0.00505991	1	0.999973	0.559266	1	0.99494	0.440734	1	3.91704e-14	1.05156e-20	5.4644e-16	4.61643	4.25169	3.94068	5.39425	3.01889e-57	3.68072e-05	2.26873e-09	1	0.999963	0.000259101	1	1	0.999741	1
CXCL1	2919	9.34167	8.67501	8.95688	8.16353	4.56344e-08	6.8059e-05	0.0434742	3.04766e-08	0.999932	0.934444	0.00125538	0.956526	0.0655557	0.000224738	1	0.998745	0.999775	9.50319	8.4989	9.10335	8.41696	1.86496e-10	8.94057e-11	0.0221931	1.35302e-08	1	0.998902	0.325526	0.977807	0.0010976	0.00115245	1	0.674474	0.998848	6.71206	5.99989	6.23436	6.0327	3.64462e-10	1.24348e-09	0.000216735	1.87566e-08	1	0.986091	0.650906	0.999783	0.0139087	0.0363902
CXCL2	2920	5.90095	5.64921	5.61103	5.32557	6.4123e-07	0.00272074	0.00798737	3.1258e-08	0.997279	0.352008	3.10853e-05	0.992013	0.647992	0.00575865	1	0.999969	0.994241	5.94174	5.67408	5.85121	5.49905	2.43732e-06	0.000153827	0.185154	1.1561e-08	0.999846	0.962395	0.0085021	0.814846	0.0376046	0.000357151	1	0.991498	0.999643	2.87133	2.62388	2.71314	2.47796	0.00017958	0.00663989	0.0922426	9.98926e-05	0.99336	0.846828	0.0107804	0.907757	0.153172	0.00573867
CXCL3	2921	9.08316	8.5428	8.9194	7.73454	4.01983e-11	0.000502195	0.223871	4.19228e-10	0.999498	0.977744	4.74805e-06	0.776129	0.0222562	2.92694e-07	1	0.999995	1	9.40468	8.52873	9.10924	8.28223	9.83168e-10	7.44027e-09	0.0612739	5.49658e-09	1	0.99874	0.0901041	0.938726	0.00126033	0.000111079	1	0.909896	0.999889	7.2185	6.45698	6.62216	6.17649	2.37413e-06	2.42089e-05	0.00429251	1.58935e-07	0.999976	0.815982	0.0278581	0.995707	0.184018	0.0124274
PF4	5196	6.33741	6.48573	6.97193	6.35698	0.000275814	0.871367	0.999452	0.551367	0.128633	0.998264	0.130009	0.000548324	0.00173574	0.000414531	0.448633	0.869991	0.999585	6.44076	6.45738	6.70909	6.38284	0.152793	0.560466	0.957354	0.33272	0.439534	0.969177	0.244665	0.042646	0.0308229	0.0179387	0.66728	0.755335	0.982061	3.48435	3.51061	3.52383	3.34292	0.347763	0.576932	0.601197	0.155865	0.423068	0.545529	0.039745	0.398803	0.454471	0.0673029
PF4V1	5197	2.5997	2.48462	2.47859	2.45853	0.000685738	0.00240555	0.0066989	0.000933816	0.997594	0.429347	0.1769	0.993301	0.570653	0.304529	0.999066	0.8231	0.695471	3.07261	3.00077	3.04633	2.98527	0.000225387	0.00041897	0.23858	0.000209	0.999581	0.917108	0.181352	0.76142	0.0828924	0.0411454	0.999791	0.818648	0.958855	NA	NA	NA	NA	NA	NA	NA	NA	NA	NA	NA	NA	NA	NA
CXCL5	6374	5.64972	4.41529	4.03757	4.79616	4.91518e-13	6.2112e-10	2.08562e-11	0.00020853	1	0.0154201	0.978116	1	0.98458	0.999524	0.999791	0.0218841	0.000476342	5.17522	4.30178	4.19411	5.09688	6.67429e-10	8.91654e-09	1.57773e-06	0.351434	1	0.278107	0.999976	0.999998	0.721893	0.999927	0.648566	2.36207e-05	7.28181e-05	3.54333	2.87272	2.84926	3.47143	8.31579e-07	0.000182615	0.000795358	0.363046	0.999817	0.439849	0.999987	0.999205	0.560151	0.999632
CXCL6	6372	5.18559	4.35305	3.98222	4.55608	1.25568e-06	2.74627e-05	6.19362e-07	0.00648574	0.999973	0.0181898	0.853697	0.999999	0.98181	0.992734	0.993514	0.146303	0.00726578	5.12632	4.49311	4.54032	5.0696	2.34562e-05	2.30778e-05	0.0033717	0.393666	0.999977	0.60226	0.999179	0.996628	0.39774	0.987675	0.606334	0.000821135	0.0123249	NA	NA	NA	NA	NA	NA	NA	NA	NA	NA	NA	NA	NA	NA
PPBP	5473	4.75169	4.46221	4.14667	5.24018	0.00623447	0.13884	0.0404711	0.910127	0.86116	0.133727	0.994021	0.959529	0.866273	0.997934	0.0898731	0.00597878	0.00206628	5.20383	4.88919	4.44651	5.74754	0.00143526	0.0995053	0.000697557	0.953781	0.900495	0.0218227	0.99677	0.999302	0.978177	0.999984	0.0462185	0.00323014	1.63765e-05	1.94335	1.90151	1.73894	2.0229	0.406196	0.402982	0.131027	0.668028	0.597018	0.0967901	0.831255	0.868973	0.90321	0.976932
CXCL9	4283	8.6436	6.71136	6.10763	7.58036	2.32958e-27	1.96015e-15	2.49967e-19	2.67179e-05	1	0.000408642	0.999995	1	0.999591	1	0.999973	5.28679e-06	4.1874e-10	8.92094	7.03315	7.07228	7.79635	1.08851e-25	3.19189e-21	1.76539e-12	1.60434e-07	1	0.575306	0.999986	1	0.424694	0.998606	1	1.3679e-05	0.00139372	4.59238	3.59235	3.31051	3.90296	3.15405e-16	8.67437e-10	5.07117e-12	1.97779e-05	1	0.00889503	0.998769	1	0.991105	0.999994
CXCL10	3627	9.07712	6.94061	6.55704	7.91108	1.22815e-33	1.38579e-19	3.22847e-20	9.46775e-07	1	0.0154299	1	1	0.98457	1	0.999999	5.9695e-08	2.07807e-09	9.37021	7.30351	7.55854	8.21826	1.7288e-27	2.83455e-24	2.68417e-11	3.77981e-08	1	0.870907	1	1	0.129093	0.995718	1	3.84982e-07	0.00428167	4.77299	3.32068	3.05751	3.61382	2.33759e-19	2.83782e-13	8.86254e-14	5.28939e-09	1	0.0473476	0.989213	1	0.952652	0.999344
CXCL11	6373	6.93727	4.71361	5.04877	5.37274	4.43326e-18	1.57857e-14	1.00345e-08	9.93987e-07	1	0.916461	0.996528	1	0.0835393	0.8557	0.999999	0.00347222	0.1443	7.58632	5.12993	5.81194	5.96305	2.81864e-22	3.21533e-19	3.41621e-07	4.77369e-08	1	0.989756	0.999749	1	0.0102444	0.676222	1	0.000251387	0.323778	4.47395	3.08134	2.9181	3.24	3.04346e-15	2.29371e-09	2.93323e-09	1.70173e-07	1	0.162702	0.889712	1	0.837298	0.961844
CXCL12	6387	6.21673	5.90288	5.62048	7.72601	3.63612e-57	0.00222797	4.51615e-06	1	0.997772	0.00248294	1	0.999995	0.997517	1	3.96047e-19	8.44829e-29	4.70846e-31	6.17113	6.06669	5.77257	7.45107	1.36841e-43	0.0979531	4.79352e-05	1	0.902047	0.000335319	1	0.999952	0.999665	1	5.2941e-17	7.09542e-20	1.38721e-23	3.7014	3.35472	3.28793	4.61826	8.32573e-42	0.00102099	0.00116687	1	0.998979	0.251165	1	0.998833	0.748835	1
CXCL13	10563	7.09188	4.65984	4.31112	5.90829	9.49084e-33	2.28309e-18	2.17461e-20	2.95756e-05	1	0.0205438	1	1	0.979456	1	0.99997	1.64139e-08	1.16919e-10	7.43012	4.97633	5.24577	6.22132	1.14612e-30	1.12139e-27	4.42135e-13	3.53279e-06	1	0.869715	1	1	0.130285	0.99934	0.999996	1.497e-07	0.000660108	2.35479	1.89608	1.94588	2.04926	7.17123e-10	1.78026e-05	0.000182552	0.00329493	0.999982	0.838171	0.999098	0.999817	0.161829	0.956576
CXCL14	9547	5.95587	8.21283	7.71465	7.47562	1.20155e-41	1	1	1	1.17414e-24	0.000170946	4.35913e-06	1.55332e-15	0.999829	0.103832	2.35731e-11	0.999996	0.896168	6.3981	8.43487	8.17631	7.96988	7.97566e-40	1	1	1	1.63612e-30	0.0502831	0.00162369	1.73161e-16	0.949717	0.148662	8.32642e-15	0.998376	0.851338	4.83121	5.66763	5.69135	5.47683	1.86569e-23	1	1	1	1.03134e-19	0.617778	0.00172559	1.00443e-15	0.382222	0.00670968
CXCL16	58191	8.91034	7.78342	8.19148	8.22624	1.59202e-38	7.23909e-32	7.38053e-13	3.49055e-12	1	1	1	1	4.21393e-07	0.642533	1	4.08886e-08	0.357467	8.89159	7.96818	8.40924	8.40562	3.95645e-31	1.58033e-30	3.584e-06	8.17435e-09	1	0.999992	1	0.999996	8.27651e-06	0.486334	1	1.67234e-08	0.513666	6.56043	5.89445	6.02847	6.03195	1.67452e-17	2.75761e-15	1.29622e-08	3.70786e-10	1	0.969299	0.991231	1	0.0307013	0.517971
CXCL17	284340	4.93054	4.62964	5.14161	4.74172	1.10191e-07	0.00143511	0.91733	0.058008	0.998565	0.999967	0.926157	0.0826703	3.30654e-05	0.00232071	0.941992	0.0738433	0.997679	5.33085	4.9804	5.20117	5.18928	1.26108e-06	4.55389e-07	0.106647	0.077417	1	0.994711	0.99576	0.893353	0.00528898	0.457216	0.922583	0.00423952	0.542784	NA	NA	NA	NA	NA	NA	NA	NA	NA	NA	NA	NA	NA	NA
CCL1	6346	3.9617	3.96535	4.06809	3.90969	0.000239506	0.547649	0.998225	0.0650844	0.452351	0.999764	0.0181216	0.00177474	0.000235823	1.44497e-06	0.934916	0.981878	0.999999	4.64151	4.65303	4.71562	4.59449	0.00566112	0.689081	0.981501	0.045239	0.310919	0.9677	0.0116145	0.0184988	0.0323003	0.000644073	0.954761	0.988386	0.999356	NA	NA	NA	NA	NA	NA	NA	NA	NA	NA	NA	NA	NA	NA
CCL2	6347	8.28307	7.23891	6.45859	9.01716	3.12764e-61	1.92695e-14	4.57995e-23	1	1	6.80201e-09	1	1	1	1	4.58643e-07	6.65732e-35	5.1873e-37	6.8213	5.97066	5.63779	7.53622	3.65364e-37	4.23794e-12	1.50612e-13	0.999996	1	0.00443835	1	1	0.995562	1	4.02673e-06	9.67792e-22	1.89336e-22	4.61485	4.28365	4.17216	4.99427	1.32734e-19	0.000672813	4.41077e-05	0.999496	0.999327	0.0791119	1	0.999956	0.920888	1
CCL4	6351	8.36235	6.7269	6.69766	7.69483	4.05563e-45	3.08034e-25	1.21662e-21	7.19671e-06	1	0.396241	1	1	0.603759	1	0.999993	3.77268e-15	1.13586e-11	7.84069	6.44915	6.52361	7.33893	7.32393e-39	2.86579e-29	4.8292e-17	0.000106583	1	0.739298	1	1	0.260702	1	0.999893	5.42906e-13	4.21492e-08	4.1409	3.37644	3.49208	3.72531	1.44415e-18	1.57383e-11	4.44993e-08	0.000109083	1	0.940061	1	1	0.0599392	0.99729
CCL5	6352	8.0048	6.44871	6.42523	7.37459	8.53633e-35	3.10997e-18	1.44498e-15	0.000131198	1	0.426555	1	1	0.573445	1	0.999869	2.30056e-14	8.1353e-10	7.84475	6.16646	6.5008	7.11065	5.63973e-39	3.04721e-28	2.09754e-13	9.99358e-07	1	0.991373	1	1	0.00862744	0.99989	0.999999	2.08019e-13	0.00010997	4.29446	3.78086	3.8378	4.04651	2.15677e-14	6.8965e-07	1.49878e-05	0.00979974	0.999999	0.877038	1	0.999985	0.122962	0.99972
CCL7	6354	3.74362	3.2777	3.16866	3.73835	3.45597e-21	5.10817e-09	2.33998e-11	0.479346	1	0.00606853	1	1	0.993931	1	0.520654	1.15862e-08	5.6772e-11	4.51461	4.19276	4.15786	4.49086	3.20741e-18	2.66667e-10	5.0149e-10	0.345068	1	0.177033	1	1	0.822967	1	0.654932	2.74572e-10	7.59591e-10	1.55672	1.37736	1.42186	1.47141	0.000488798	0.00020237	0.0188854	0.0577057	0.999798	0.811971	0.995627	0.981115	0.188029	0.816583
CCL8	6355	7.34894	5.40026	4.96662	6.84802	1.57569e-57	8.00592e-24	3.05654e-29	0.00422783	1	1.98649e-05	1	1	0.99998	1	0.995772	1.78794e-19	2.48768e-25	6.69923	4.87714	4.79934	6.32354	2.8026e-45	5.19714e-26	2.46491e-19	0.0148442	1	0.294855	1	1	0.705145	1	0.985156	7.5363e-21	6.12741e-15	3.67844	2.82912	2.72527	3.59776	1.78886e-19	9.751e-09	1.46049e-09	0.310368	1	0.121435	1	1	0.878565	1
CCL11	6356	6.74901	6.90496	6.08006	7.61963	2.65982e-11	0.828697	0.000927215	0.999974	0.171303	4.39943e-06	0.999964	0.999073	0.999996	1	2.58593e-05	3.59226e-05	3.82938e-11	6.09215	6.329	6.04861	6.58549	0.00574189	0.973976	0.404201	0.9966	0.0260245	0.0473224	0.937272	0.595799	0.952678	0.993676	0.00339995	0.0627284	0.00632396	4.9431	5.39185	5.22582	5.94124	7.15516e-08	0.997717	0.931135	1	0.00228264	0.14768	0.999954	0.0688646	0.85232	0.999964
CCL13	6357	5.10692	4.71467	4.62525	5.14828	4.63139e-22	9.75237e-10	5.64661e-12	0.694636	1	0.016697	1	1	0.983303	1	0.305364	2.80216e-10	1.76826e-12	5.1302	4.86578	4.86754	5.18019	2.71465e-12	3.91537e-08	8.47121e-06	0.771122	1	0.514873	1	0.999992	0.485127	0.999996	0.228878	1.31416e-07	4.18986e-06	3.35991	2.93723	2.9698	3.32309	2.24919e-10	2.17069e-06	3.25918e-05	0.361532	0.999998	0.701956	1	0.999967	0.298044	0.999984
CCL16	6360	3.37332	3.52458	3.45531	3.47037	0.00876902	0.999953	0.963571	0.928369	4.66433e-05	0.0315936	0.185815	0.0364288	0.968406	0.590715	0.0716314	0.814185	0.409285	4.47738	4.61055	4.63084	4.50312	1.99744e-08	1	0.999974	0.827968	5.01288e-08	0.717164	3.05519e-05	2.56835e-05	0.282836	0.000455258	0.172032	0.999969	0.999545	NA	NA	NA	NA	NA	NA	NA	NA	NA	NA	NA	NA	NA	NA
CCL17	6361	5.06923	5.08927	5.09486	5.14931	0.341085	0.704181	0.713014	0.916077	0.295819	0.562155	0.881929	0.286986	0.437845	0.830512	0.0839226	0.118071	0.169488	4.45123	4.39012	4.41047	4.46712	0.0572345	0.0189945	0.149426	0.651613	0.981005	0.721872	0.981983	0.850574	0.278128	0.896822	0.348387	0.0180166	0.103178	NA	NA	NA	NA	NA	NA	NA	NA	NA	NA	NA	NA	NA	NA
CCL18	6362	9.03909	6.93472	6.71052	8.91226	1.88244e-49	1.12759e-22	3.55887e-23	0.283895	1	0.0579254	1	1	0.942075	1	0.716105	9.55993e-22	4.2498e-22	8.09645	6.19917	6.02715	7.76756	7.52667e-41	1.05137e-24	8.02022e-19	0.0476616	1	0.147977	1	1	0.852023	1	0.952338	8.44499e-18	1.59814e-14	5.96449	4.46916	3.82306	5.66118	2.74166e-24	3.09984e-10	1.06237e-14	0.107385	1	0.000208974	1	1	0.999791	1
CCL19	6363	5.73372	5.31715	5.25825	6.65242	1.99822e-22	0.00371042	0.00251288	0.999996	0.99629	0.287558	1	0.997487	0.712442	1	4.28215e-06	8.23937e-15	2.50552e-14	5.30383	4.96166	4.91364	5.90205	1.40632e-12	0.000404751	0.0042347	0.999592	0.999595	0.357451	1	0.995765	0.642549	0.999999	0.000407742	4.02442e-08	5.75013e-07	3.21239	2.83065	3.00572	3.43097	1.77748e-08	0.00204197	0.0825371	0.925012	0.997958	0.956793	1	0.917463	0.0432072	0.999501
CCL20	6364	9.32758	10.1654	10.1139	8.63605	2.4511e-15	0.999971	0.998027	0.00374211	2.93826e-05	0.406223	2.01464e-12	0.00197326	0.593777	7.75507e-08	0.996258	1	1	9.86156	10.2136	10.161	9.03275	9.24899e-08	0.969566	0.903412	0.000286615	0.0304342	0.399725	7.97664e-08	0.0965885	0.600275	8.33263e-06	0.999713	1	0.999992	3.43587	3.71901	3.44523	3.24255	1.05102e-08	0.997808	0.532733	0.0311277	0.00219205	0.001359	4.17808e-10	0.467267	0.998641	0.0175455
CCL21	6366	6.45539	5.8554	5.32938	7.10523	3.36979e-32	1.80935e-05	4.527e-12	0.999859	0.999982	6.88388e-08	1	1	1	1	0.000140715	5.41603e-17	4.49667e-25	6.34569	6.01468	5.654	6.95436	1.72586e-24	6.58422e-05	1.17883e-11	0.999994	0.999934	5.57851e-06	1	1	0.999994	1	6.06171e-06	3.96625e-12	8.29468e-18	NA	NA	NA	NA	NA	NA	NA	NA	NA	NA	NA	NA	NA	NA
CCL22	6367	5.77191	5.604	5.53301	5.80358	9.72426e-06	0.00350591	0.000433263	0.660032	0.996494	0.0728694	0.999656	0.999567	0.927131	0.999958	0.339968	0.000344084	4.20467e-05	6.13059	6.06729	6.07175	6.18959	0.0207904	0.0583452	0.0998722	0.875524	0.941655	0.545694	0.996356	0.900128	0.454306	0.990171	0.124476	0.00364426	0.00982852	NA	NA	NA	NA	NA	NA	NA	NA	NA	NA	NA	NA	NA	NA
CCL23	6368	3.18027	3.03186	3.08509	3.36678	2.29881e-15	0.000211351	0.0215377	0.99766	0.999789	0.960771	1	0.978462	0.0392291	0.999998	0.00234027	7.16823e-09	2.29575e-06	3.71372	3.56763	3.59338	3.74179	2.50942e-18	3.98369e-10	8.86951e-06	0.821218	1	0.907544	1	0.999991	0.0924562	1	0.178782	2.58236e-11	3.61241e-07	4.17332	4.20683	4.47722	4.22924	1.13742e-05	0.744318	0.999896	0.837384	0.255682	0.999887	0.699047	0.000104407	0.000113458	0.000608612
CCL24	6369	5.77034	6.50151	7.00066	6.15219	8.97765e-13	1	1	0.993116	3.50241e-09	0.999286	0.00476593	2.25865e-11	0.000713995	2.93129e-06	0.0068843	0.995234	0.999997	5.75074	6.30847	6.89693	6.09719	1.0385e-11	0.999999	1	0.995262	5.75789e-07	0.999664	0.0367626	2.61743e-09	0.000335708	1.26528e-05	0.00473768	0.963237	0.999987	5.18211	5.29996	5.55051	5.26915	3.80381e-07	0.98699	1	0.933268	0.01301	0.999996	0.244909	3.84151e-08	4.08216e-06	2.13173e-06
CCL25	6370	3.84672	3.83828	3.84714	3.68919	0.397881	0.469401	0.501476	0.0690217	0.530599	0.539977	0.0252266	0.498524	0.460023	0.029524	0.930978	0.974773	0.970476	4.9028	4.93072	4.89231	4.82118	0.54239	0.639477	0.452913	0.197226	0.360523	0.284818	0.0771741	0.547087	0.715182	0.207698	0.802774	0.922826	0.792302	NA	NA	NA	NA	NA	NA	NA	NA	NA	NA	NA	NA	NA	NA
CCL26	10344	4.2569	3.74907	4.61146	4.28984	3.46074e-18	1.929e-07	0.977945	0.601902	1	1	1	0.0220547	1.45086e-07	0.0339203	0.398098	4.13269e-08	0.96608	5.11582	4.5794	5.1714	5.03375	1.20888e-14	1.25747e-09	0.658502	0.232181	1	0.999999	1	0.341498	1.16734e-06	0.154282	0.767819	9.58132e-08	0.845718	2.84164	2.47499	2.64987	2.72394	2.85064e-10	7.23159e-08	0.00903635	0.0590661	1	0.998207	0.999999	0.990964	0.0017931	0.855749
CCL27	10850	3.37413	3.46527	3.51354	3.37305	0.00221775	0.978387	0.996871	0.491342	0.0216133	0.914424	0.00397046	0.00312918	0.0855763	0.000440665	0.508658	0.99603	0.999559	4.22509	4.19487	4.2422	4.17529	0.203287	0.120422	0.687955	0.0456817	0.879578	0.920229	0.239462	0.312045	0.0797714	0.0338408	0.954318	0.760538	0.966159	NA	NA	NA	NA	NA	NA	NA	NA	NA	NA	NA	NA	NA	NA
CCL28	56477	6.00721	6.00157	6.66204	5.40533	5.83306e-13	0.484044	0.999897	0.000121938	0.515956	0.999999	3.7337e-07	0.000103175	1.09366e-06	6.03119e-14	0.999878	1	1	5.94689	5.88198	6.62438	5.43901	2.49066e-10	0.304605	0.999989	0.000362213	0.695395	1	0.000176736	1.09751e-05	5.8361e-08	7.24262e-13	0.999638	0.999823	1	2.99831	2.83626	3.1695	2.6484	5.8396e-05	0.0842354	0.879004	0.0020914	0.915765	0.997831	0.00897144	0.120996	0.00216943	1.03211e-05
XCL1	6375	4.1393	3.8826	3.92184	4.0047	8.75334e-06	5.0454e-06	0.000748071	0.0187561	0.999995	0.771348	0.99341	0.999252	0.228652	0.910504	0.981244	0.00658997	0.0894961	4.59236	4.4017	4.45105	4.46793	2.62879e-05	1.17858e-06	0.00157787	0.00450008	0.999999	0.876043	0.938572	0.998422	0.123957	0.632394	0.9955	0.0614282	0.367606	2.19835	2.19609	2.27546	2.16	0.0897945	0.475242	0.951928	0.151955	0.524758	0.968047	0.135084	0.048072	0.0319528	0.00430048
CX3CL1	6376	6.33979	5.87551	6.06892	6.29832	1.61936e-13	1.48575e-06	0.00972666	0.338687	0.999999	0.992909	1	0.990273	0.007091	0.996266	0.661313	5.01748e-14	0.00373447	6.36043	5.91403	6.19	6.1975	1.08345e-08	2.6046e-07	0.0553414	0.0663453	1	0.999772	0.999816	0.944659	0.000228404	0.529676	0.933655	0.000183807	0.470324	5.38698	4.97715	5.1384	5.19999	1.02572e-08	1.9362e-05	0.00807196	0.0286962	0.999981	0.99713	0.999996	0.991928	0.00287039	0.841738
CXCR1	3577	6.19635	6.05003	6.07879	6.02128	1.8961e-05	6.92581e-06	0.00213395	3.16766e-05	0.999993	0.807513	0.210606	0.997866	0.192487	0.0919248	0.999968	0.789394	0.908075	6.22321	6.15205	6.13093	6.186	0.0198014	0.00704765	0.00770416	0.142266	0.992952	0.246867	0.89387	0.992296	0.753133	0.933581	0.857734	0.10613	0.066419	NA	NA	NA	NA	NA	NA	NA	NA	NA	NA	NA	NA	NA	NA
CXCR2	3579	5.58465	5.09457	4.98546	5.4162	5.44511e-08	4.41789e-05	2.3589e-06	0.123142	0.999956	0.059492	0.999084	0.999998	0.940508	0.999957	0.876858	0.000915691	4.31096e-05	4.80182	4.42025	4.40677	4.69945	2.40378e-07	4.43698e-06	2.18695e-05	0.157517	0.999996	0.422274	0.99972	0.999978	0.577726	0.999251	0.842483	0.000280073	0.000749098	4.14081	4.09037	4.32639	4.18876	0.000664486	0.23605	0.987152	0.742136	0.76395	0.999969	0.988687	0.0128481	3.08883e-05	0.0129527
CXCR3	2833	5.79375	5.83251	5.61933	5.78952	0.000408264	0.772373	0.00141237	0.473907	0.227627	7.86625e-08	0.187711	0.998588	1	0.998961	0.526093	0.812289	0.00103856	5.53045	5.61363	5.54803	5.53998	0.0295901	0.99285	0.661894	0.593834	0.00714977	0.036685	0.0157766	0.338106	0.963315	0.424574	0.406166	0.984223	0.575426	NA	NA	NA	NA	NA	NA	NA	NA	NA	NA	NA	NA	NA	NA
CXCR4	7852	8.91317	7.3869	7.68301	8.81296	1.35763e-44	2.53205e-22	3.13944e-11	0.252489	1	0.981338	1	1	0.0186623	1	0.747511	9.4866e-27	5.10411e-11	8.57696	7.28561	7.70215	8.65914	9.31498e-33	1.44193e-22	9.01806e-07	0.72203	1	0.994848	1	0.999999	0.00515234	1	0.27797	3.71904e-22	1.81526e-07	5.86828	4.91739	4.92452	5.84525	2.41673e-30	2.31064e-11	4.67132e-09	0.433215	1	0.525648	1	1	0.474352	1
CXCR5	643	4.43166	4.46247	4.47873	4.48703	0.436115	0.800558	0.864109	0.904929	0.199442	0.708126	0.803022	0.135891	0.291874	0.590069	0.0950706	0.196978	0.409931	5.0289	5.02314	5.07792	5.02782	0.37649	0.395942	0.91385	0.48671	0.604058	0.946186	0.561252	0.0861501	0.0538137	0.113946	0.51329	0.438748	0.886054	1.25635	1.23189	1.3038	1.22515	0.177036	0.241903	0.862735	0.215739	0.758097	0.980579	0.410077	0.137265	0.0194206	0.0232399
CXCR6	10663	5.6176	5.24377	5.29359	5.36594	2.49636e-08	2.57386e-06	0.000196798	0.00257854	0.999997	0.808964	0.984799	0.999803	0.191036	0.845117	0.997421	0.0152008	0.154883	5.64999	5.14037	5.31483	5.2489	1.59992e-14	1.05218e-11	6.87055e-05	1.32557e-06	1	0.995988	0.962876	0.999931	0.00401247	0.198899	0.999999	0.0371238	0.801101	3.27288	3.08173	3.08716	3.20941	0.00487458	0.00916344	0.0174387	0.225873	0.990837	0.539838	0.994999	0.982561	0.460162	0.977675
CCR1	1230	6.58744	5.69445	5.38616	6.58895	1.72959e-48	1.04701e-16	1.3247e-23	0.505262	1	2.26549e-07	1	1	1	1	0.494738	6.37565e-20	1.38609e-27	6.40254	5.64993	5.46482	6.508	8.78887e-42	7.45166e-19	1.58547e-18	0.880881	1	0.00730691	1	1	0.992693	1	0.119119	2.01908e-24	5.45973e-22	3.88557	3.37699	3.17323	3.83636	1.40275e-27	3.47922e-09	4.61783e-13	0.288556	1	0.000292973	1	1	0.999707	1
CCR2	729230	4.17724	3.74172	3.65919	4.27727	4.83946e-24	6.4438e-08	3.70638e-09	0.850145	1	0.041974	1	1	0.958026	1	0.149855	6.06074e-13	4.69236e-14	4.43845	4.19531	4.17422	4.60614	1.97398e-19	3.4586e-08	4.16806e-06	0.995127	1	0.321932	1	0.999996	0.678068	1	0.00487289	8.10824e-12	6.01211e-10	1.9017	1.82218	1.90196	1.89744	0.103169	0.0464376	0.501671	0.465822	0.953562	0.936738	0.980416	0.498329	0.0632619	0.466831
CCR3	1232	3.82179	3.91797	3.79595	3.87968	0.038163	0.971117	0.328242	0.821239	0.0288831	0.00204514	0.213462	0.671758	0.997955	0.931128	0.178761	0.786538	0.0688721	4.392	4.44968	4.43116	4.43899	0.394218	0.956659	0.821192	0.875441	0.0433409	0.321029	0.388985	0.178808	0.678971	0.56764	0.124559	0.611015	0.43236	NA	NA	NA	NA	NA	NA	NA	NA	NA	NA	NA	NA	NA	NA
CCR5	1234	7.12161	6.32275	6.24117	6.91047	1.63259e-31	3.57577e-12	2.98666e-13	0.0389085	1	0.0648188	1	1	0.935181	1	0.961092	2.24773e-13	3.66392e-14	6.74223	6.02791	6.07966	6.59341	1.09314e-27	8.0276e-18	1.71672e-11	0.055477	1	0.768591	1	1	0.231409	1	0.944523	7.70294e-13	4.56444e-08	3.87117	3.2672	3.27373	3.614	4.00882e-10	1.00726e-06	5.48502e-06	0.0234427	0.999999	0.531395	0.999992	0.999995	0.468605	0.999802
CCR6	1235	4.14379	4.04966	3.99089	3.92355	0.0634657	0.136774	0.0663509	0.00943619	0.863226	0.21414	0.0215728	0.933649	0.78586	0.20678	0.990564	0.978427	0.79322	4.0198	4.0619	4.05539	4.03061	0.851741	0.803378	0.67518	0.568442	0.196622	0.465005	0.292948	0.32482	0.534995	0.383507	0.431558	0.707052	0.616493	1.64828	1.62104	1.63359	1.60141	0.54044	0.176517	0.337062	0.0916126	0.823483	0.673702	0.242597	0.662938	0.326298	0.171995
CCR7	1236	5.70849	5.35977	5.38341	5.8241	8.08979e-07	0.00180455	0.00827435	0.788332	0.998195	0.606935	0.999994	0.991726	0.393065	0.99982	0.211668	5.90076e-06	0.000180146	5.14216	4.80728	4.91118	5.23051	1.69607e-08	2.07702e-07	0.00405811	0.805711	1	0.911154	0.999991	0.995942	0.088846	0.997756	0.194289	9.28898e-06	0.00224408	3.80423	3.64948	3.8719	3.83122	0.000818901	0.00933553	0.762422	0.642219	0.990664	0.99638	0.999375	0.237578	0.00361975	0.323118
CCR8	1237	4.13098	4.01287	4.03457	4.08233	0.000423467	0.00016323	0.00716378	0.0975127	0.999837	0.761703	0.99216	0.992836	0.238297	0.90643	0.902487	0.00783966	0.0935705	4.41933	4.33501	4.30469	4.37302	0.0107475	0.00213019	0.00141577	0.103451	0.99787	0.190747	0.87128	0.998584	0.809253	0.951278	0.896549	0.12872	0.048722	NA	NA	NA	NA	NA	NA	NA	NA	NA	NA	NA	NA	NA	NA
CCR9	10803	3.37584	3.39582	3.38102	3.35264	0.387999	0.752331	0.564503	0.251328	0.247669	0.255771	0.0500348	0.435497	0.744229	0.164986	0.748672	0.949965	0.835014	3.75123	3.73011	3.73333	3.76463	0.475389	0.137521	0.248425	0.672816	0.862479	0.550574	0.881893	0.751575	0.449426	0.820422	0.327184	0.118107	0.179578	NA	NA	NA	NA	NA	NA	NA	NA	NA	NA	NA	NA	NA	NA
CCR10	2826	4.2197	4.11229	4.22807	4.22618	0.151758	0.0853371	0.530707	0.529953	0.914663	0.90802	0.978301	0.469293	0.0919798	0.492009	0.470047	0.0216989	0.507991	4.58768	4.54256	4.58254	4.66527	0.0289918	0.089106	0.461894	0.942791	0.910894	0.778535	0.995095	0.538106	0.221465	0.904575	0.0572087	0.00490452	0.095425	NA	NA	NA	NA	NA	NA	NA	NA	NA	NA	NA	NA	NA	NA
PITPNM3	83394	4.53158	4.17502	4.5562	4.15729	1.77379e-17	4.63095e-09	0.633844	4.49728e-08	1	1	0.356613	0.366156	2.31041e-10	3.27161e-09	1	0.643387	1	4.95787	4.62751	4.94304	4.76968	9.2898e-12	1.63232e-10	0.414913	0.00185564	1	0.999999	0.995547	0.585087	5.8259e-07	0.00871375	0.998144	0.00445261	0.991286	3.46666	3.27987	3.49128	3.29487	1.3835e-06	9.1729e-05	0.662298	0.000801717	0.999908	0.999994	0.648526	0.337702	5.67598e-06	9.66997e-05
XCR1	2829	3.43461	3.43954	3.49452	3.42602	0.111363	0.568353	0.959985	0.395708	0.431647	0.987637	0.268416	0.0400146	0.0123635	0.00887499	0.604292	0.731584	0.991125	4.35184	4.34773	4.38989	4.29749	0.0286199	0.425576	0.876613	0.0178087	0.574424	0.910704	0.0174261	0.123387	0.0892959	0.0037724	0.982191	0.982574	0.996228	NA	NA	NA	NA	NA	NA	NA	NA	NA	NA	NA	NA	NA	NA
CX3CR1	1524	3.79492	3.83449	3.76074	4.1335	1.30695e-13	0.834869	0.24113	1	0.165131	0.0371794	1	0.75887	0.962821	1	4.88845e-09	7.52259e-09	2.97598e-10	4.26398	4.33943	4.27876	4.55009	2.22539e-10	0.993766	0.638737	1	0.00623359	0.0636637	0.999964	0.361263	0.936336	0.999996	1.49621e-07	3.60384e-05	4.33432e-06	1.72401	1.86263	1.66124	1.94173	6.66193e-05	0.985443	0.182149	0.998742	0.0145574	5.20497e-05	0.930801	0.817851	0.999948	0.999997
IL1A	3552	4.40142	4.05302	4.4245	4.10765	8.07852e-09	3.56651e-05	0.583179	0.00134793	0.999964	0.999992	0.813201	0.416821	7.64088e-06	0.000458714	0.998652	0.186799	0.999541	4.65027	4.41232	4.64767	4.53842	1.4503e-05	6.004e-06	0.487204	0.0431018	0.999994	0.99899	0.988093	0.512796	0.0010101	0.0937308	0.956898	0.0119067	0.906269	2.17304	1.94821	2.00949	1.97227	0.00152126	0.000480943	0.0207369	0.00307899	0.999519	0.856198	0.696793	0.979263	0.143802	0.281364
IL1B	3553	8.38365	7.00072	7.67613	7.45346	1.49311e-17	1.50696e-12	0.000630865	1.17792e-05	1	0.999985	0.998323	0.999369	1.46797e-05	0.128496	0.999988	0.00167725	0.871504	8.07511	7.02574	7.60964	7.8223	6.17283e-15	2.77853e-13	0.0034363	0.0855747	1	0.999969	0.999999	0.996564	3.08238e-05	0.871336	0.914425	5.80618e-07	0.128664	6.75458	5.73716	5.98218	6.22661	3.51131e-09	9.9985e-09	0.00014738	0.00322437	1	0.936982	0.999808	0.999853	0.0630179	0.90804
IL2	3558	2.68859	2.70502	2.72756	2.69866	0.34113	0.845519	0.967982	0.708915	0.154481	0.883416	0.344712	0.0320182	0.116584	0.0824672	0.291085	0.655288	0.917533	3.14828	3.16133	3.21059	3.1342	0.000383725	0.842668	0.999444	0.179332	0.157332	0.997528	0.0222361	0.000556455	0.00247241	5.08566e-05	0.820668	0.977764	0.999949	NA	NA	NA	NA	NA	NA	NA	NA	NA	NA	NA	NA	NA	NA
IL3	3562	3.11897	3.24387	3.19251	3.17194	3.98116e-05	0.999981	0.981118	0.948781	1.86245e-05	0.0352927	0.00187938	0.018882	0.964707	0.255262	0.0512191	0.998121	0.744738	3.54364	3.60312	3.62107	3.56576	0.000900125	0.999877	0.999388	0.853386	0.000122522	0.786649	0.0333336	0.000611707	0.213351	0.0186784	0.146614	0.966666	0.981322	NA	NA	NA	NA	NA	NA	NA	NA	NA	NA	NA	NA	NA	NA
IL4	3565	2.92089	2.89553	2.89507	2.86335	0.0752509	0.123585	0.17157	0.00999684	0.876415	0.491077	0.0280889	0.82843	0.508923	0.0875679	0.990003	0.971911	0.912432	3.50228	3.49693	3.52392	3.48959	0.287173	0.340509	0.892366	0.214187	0.659491	0.956849	0.300256	0.107634	0.0431508	0.0303328	0.785813	0.699744	0.969667	3.04913	3.0206	3.15102	3.1155	9.71392e-06	0.161278	0.993465	0.979997	0.838722	0.999866	0.999951	0.0065346	0.000134376	0.171454
IL5	3567	2.87183	2.91528	2.94279	2.89345	0.123026	0.937996	0.974335	0.753514	0.0620039	0.832108	0.163709	0.0256651	0.167892	0.0616246	0.246486	0.836291	0.938375	3.59788	3.59201	3.59505	3.55487	0.182911	0.384157	0.455462	0.0243645	0.615843	0.554314	0.0203691	0.544538	0.445686	0.0472615	0.975635	0.979631	0.952738	NA	NA	NA	NA	NA	NA	NA	NA	NA	NA	NA	NA	NA	NA
IL6	3569	7.22775	5.9262	5.57286	6.97643	3.81101e-25	1.18172e-12	4.44127e-16	0.119595	1	0.00212311	1	1	0.997877	1	0.880405	1.47644e-09	5.57138e-13	6.27718	5.4036	5.28103	6.41303	6.10249e-24	8.4026e-15	4.38676e-13	0.811921	1	0.123505	1	1	0.876495	1	0.188079	1.34572e-11	8.8495e-12	4.60333	3.93766	3.68614	4.81971	1.00109e-17	4.72704e-05	5.05301e-07	0.880904	0.999953	0.0130326	1	0.999999	0.986967	1
IL7	3574	4.96889	4.72553	4.80907	4.40327	0.00139566	0.0294012	0.145071	5.62176e-05	0.970599	0.747013	0.00301356	0.854929	0.252987	0.00226323	0.999944	0.996986	0.997737	6.37469	5.88447	6.06279	5.69586	3.53965e-06	1.23797e-05	0.0237567	6.24316e-08	0.999988	0.880155	0.0547334	0.976243	0.119845	0.0110953	1	0.945267	0.988905	2.72741	2.71689	2.62159	2.70043	0.265754	0.41289	0.0332849	0.293463	0.58711	0.0266955	0.338982	0.966715	0.973305	0.938815
CXCL8	3576	10.0325	8.24239	8.20814	8.90649	7.88458e-18	4.01615e-16	2.53816e-10	4.41304e-06	1	0.441235	0.999423	1	0.558765	0.993951	0.999996	0.000576999	0.00604948	9.58879	7.81777	8.02548	9.07567	6.53027e-20	1.47219e-19	3.21184e-08	0.0156677	1	0.796466	1	1	0.203534	0.999745	0.984332	2.78441e-08	0.000254525	NA	NA	NA	NA	NA	NA	NA	NA	NA	NA	NA	NA	NA	NA
IL9	3578	2.81773	2.84047	2.90723	2.81213	0.00298684	0.842964	0.998991	0.414804	0.157036	0.997207	0.0846709	0.00100918	0.0027932	0.000280247	0.585196	0.915329	0.99972	3.42888	3.4673	3.46811	3.39947	6.30591e-05	0.995049	0.960915	0.0301578	0.00495062	0.515358	1.50224e-06	0.0390852	0.484642	0.00104604	0.969842	0.999998	0.998954	2.46692	2.38879	2.53712	2.45443	0.0231483	0.0486898	0.86596	0.404973	0.95131	0.9963	0.946278	0.13404	0.00370006	0.0806816
IL10	3586	3.19189	3.00413	3.00258	3.1673	2.66422e-13	9.1086e-08	1.10727e-06	0.286975	1	0.475201	0.999999	0.999999	0.524799	0.99999	0.713025	9.62721e-07	9.99068e-06	3.70178	3.67869	3.70211	3.75833	0.00179429	0.105286	0.504682	0.984685	0.894714	0.82523	0.99967	0.495318	0.17477	0.964456	0.0153151	0.000329719	0.0355444	NA	NA	NA	NA	NA	NA	NA	NA	NA	NA	NA	NA	NA	NA
IL11	3589	5.01065	4.84233	4.64411	4.92171	0.00292822	0.0393873	0.000149293	0.212323	0.960613	0.000577977	0.84164	0.999851	0.999422	0.99946	0.787677	0.15836	0.0005405	5.3796	5.18878	5.07058	5.37244	2.1004e-06	0.000356364	5.56351e-08	0.461722	0.999644	0.00106742	0.998026	1	0.998933	0.999998	0.538278	0.00197381	2.13778e-06	4.14727	4.30837	4.44391	4.31134	6.21595e-05	0.999785	1	0.999786	0.000214501	0.993942	0.529736	4.84198e-07	0.00605792	0.0076336
IL12A	3592	3.34455	3.32684	3.17606	3.17643	3.06118e-09	0.313029	1.90543e-05	7.03111e-06	0.686971	2.07429e-07	3.39867e-09	0.999981	1	0.504962	0.999993	1	0.495038	3.83901	3.87754	3.78208	3.72435	3.19875e-06	0.885862	0.061206	0.000990967	0.114138	0.000450324	6.63657e-08	0.938794	0.99955	0.0416394	0.999009	1	0.958361	NA	NA	NA	NA	NA	NA	NA	NA	NA	NA	NA	NA	NA	NA
IL12B	3593	2.62474	2.59182	2.60996	2.58666	0.3123	0.0494743	0.299911	0.057843	0.950526	0.770258	0.396788	0.700089	0.229742	0.203408	0.942157	0.603212	0.796592	3.08358	3.03749	3.07048	3.04401	0.00111786	0.000103903	0.212164	0.00541081	0.999896	0.985208	0.681204	0.787836	0.0147922	0.0673548	0.994589	0.318796	0.932645	NA	NA	NA	NA	NA	NA	NA	NA	NA	NA	NA	NA	NA	NA
IL13	3596	4.56995	4.71427	4.7025	4.66129	0.000865318	0.999958	0.998303	0.981597	4.2053e-05	0.3775	0.073567	0.00169749	0.6225	0.180705	0.0184028	0.926433	0.819295	5.8337	5.89147	5.96526	5.8025	0.000982187	0.968705	0.996604	0.196793	0.031295	0.949146	0.00351932	0.00339639	0.050854	0.000588865	0.803207	0.996481	0.999411	NA	NA	NA	NA	NA	NA	NA	NA	NA	NA	NA	NA	NA	NA
IL15	3600	5.56822	4.60192	4.95156	4.97289	1.73911e-26	1.59678e-21	5.11562e-09	8.02796e-09	1	0.999982	0.999997	1	1.78002e-05	0.587757	1	3.38207e-06	0.412243	5.63313	4.77719	5.09916	5.04068	2.66764e-26	3.22884e-22	1.32442e-07	5.0973e-11	1	0.999863	0.999856	1	0.000136552	0.264195	1	0.000143682	0.735805	2.43983	2.28339	2.35871	2.32051	3.82713e-05	7.19698e-06	0.0279541	0.000765795	0.999993	0.9871	0.918193	0.972046	0.0129001	0.143676
IL16	3603	4.71643	4.60253	4.63868	4.84035	8.76244e-11	0.00283172	0.0703297	0.994764	0.997168	0.81692	1	0.92967	0.18308	0.999981	0.00523627	2.82293e-11	1.93396e-05	5.47977	5.35846	5.3989	5.53632	6.27766e-10	1.6788e-07	0.00784781	0.940535	1	0.903939	1	0.992152	0.0960607	0.999413	0.0594651	4.05918e-07	0.000586597	3.97852	4.01703	4.20957	4.00481	0.0437903	0.698847	0.990448	0.632542	0.301153	0.989124	0.416475	0.00955217	0.0108759	0.00947142
IL17A	3605	3.08654	3.26219	3.28943	3.05525	3.77247e-09	0.999993	0.999889	0.188968	7.29689e-06	0.708967	3.91388e-12	0.000110947	0.291033	1.20729e-06	0.811032	1	0.999999	3.53266	3.58034	3.65911	3.43991	1.01248e-06	0.960471	0.983919	0.000175615	0.0395295	0.913363	1.07045e-08	0.0160806	0.0866365	0.000135629	0.999824	1	0.999864	NA	NA	NA	NA	NA	NA	NA	NA	NA	NA	NA	NA	NA	NA
IL17B	27190	4.44709	4.49625	4.55656	4.50581	0.243482	0.871285	0.975498	0.862663	0.128715	0.90972	0.588187	0.0245015	0.0902802	0.177954	0.137337	0.411813	0.822046	4.56606	4.47603	4.52982	4.49879	0.0234053	0.00108612	0.183885	0.0409335	0.998914	0.927189	0.742898	0.816115	0.0728113	0.243181	0.959066	0.257102	0.756819	NA	NA	NA	NA	NA	NA	NA	NA	NA	NA	NA	NA	NA	NA
IL17C	27189	5.86857	6.10855	6.04504	6.0257	6.20549e-07	1	0.998627	0.998393	1.47595e-07	0.0914175	0.02165	0.00137278	0.908583	0.362982	0.00160682	0.97835	0.637018	6.74539	7.00366	6.96512	6.91551	5.6196e-11	1	0.999997	0.999944	3.19259e-13	0.193054	0.0164387	3.49989e-06	0.806946	0.168796	5.62896e-05	0.983561	0.831204	3.75333	3.71033	3.91194	3.67624	0.000116461	0.198962	0.993115	0.078074	0.801038	0.999934	0.187054	0.00688488	6.57696e-05	1.37389e-05
IL17D	53342	4.6085	4.57999	4.22744	4.6364	1.89799e-05	0.353046	2.35801e-05	0.632096	0.646954	3.57008e-06	0.807805	0.999976	0.999996	0.999999	0.367904	0.192195	9.59603e-07	4.79813	4.9407	4.59254	5.01417	2.61947e-05	0.990298	0.0249822	0.998111	0.00970235	0.000500672	0.84947	0.975018	0.999499	0.999887	0.00188934	0.15053	0.000112695	3.43961	3.83652	3.39302	3.58447	2.58136e-12	1	0.251222	0.982673	2.45776e-09	2.94686e-12	1.12247e-05	0.748778	1	0.998408
IL17F	112744	3.69369	3.88094	3.87223	3.75109	2.82723e-05	0.999975	0.99964	0.865124	2.47329e-05	0.417833	0.0011996	0.00035989	0.582167	0.00767218	0.134876	0.9988	0.992328	4.24149	4.25786	4.25493	4.20419	0.367623	0.717035	0.632717	0.130094	0.282965	0.469167	0.0425912	0.367283	0.530833	0.111412	0.869906	0.957409	0.888588	NA	NA	NA	NA	NA	NA	NA	NA	NA	NA	NA	NA	NA	NA
IL18	3606	6.92147	6.04499	6.67554	6.19381	5.01173e-14	2.30807e-12	0.0533414	2.10658e-07	1	0.999998	0.90559	0.946659	1.82706e-06	0.000761731	1	0.0944096	0.999238	6.68564	5.82125	6.235	6.40098	1.32473e-11	3.09895e-12	0.00340288	0.0255661	1	0.996289	0.999991	0.996597	0.00371052	0.831463	0.974434	8.80429e-06	0.168537	3.172	2.8567	3.08397	2.99682	5.29648e-11	7.52773e-08	0.103578	0.00258189	1	0.999991	0.999822	0.896422	8.51734e-06	0.0631739
IL19	29949	4.0528	4.06191	4.13235	4.06861	0.236239	0.59301	0.939583	0.640554	0.40699	0.960428	0.588396	0.0604168	0.0395715	0.0783122	0.359446	0.411604	0.921688	5.17073	5.21771	5.31481	5.20876	0.0308188	0.947738	0.996248	0.78736	0.0522623	0.971825	0.421073	0.00375182	0.0281749	0.0465923	0.21264	0.578927	0.953408	NA	NA	NA	NA	NA	NA	NA	NA	NA	NA	NA	NA	NA	NA
IL20	50604	3.58403	3.68218	3.68002	3.68593	0.0211903	0.995866	0.982807	0.993554	0.00413378	0.47617	0.54945	0.0171931	0.52383	0.558766	0.006446	0.45055	0.441234	4.28287	4.39257	4.41284	4.37774	0.00139243	0.999864	0.998058	0.997104	0.000136324	0.683885	0.321161	0.00194242	0.316115	0.220182	0.00289601	0.678839	0.779818	NA	NA	NA	NA	NA	NA	NA	NA	NA	NA	NA	NA	NA	NA
IL21	59067	3.47323	3.47902	3.53446	3.46378	0.0539164	0.600848	0.976534	0.35323	0.399152	0.983054	0.210975	0.0234657	0.016946	0.00636001	0.64677	0.789025	0.99364	4.17343	4.14246	4.15997	4.10095	0.0171034	0.0564291	0.312141	0.000803645	0.943571	0.748689	0.0242902	0.687859	0.251311	0.0202927	0.999196	0.97571	0.979707	NA	NA	NA	NA	NA	NA	NA	NA	NA	NA	NA	NA	NA	NA
IL22	50616	3.31804	3.42559	3.42863	3.317	1.99285e-05	0.999998	0.995667	0.481753	2.06645e-06	0.529076	2.69574e-06	0.00433329	0.470924	0.00424117	0.518247	0.999997	0.995759	4.0153	4.08091	4.09737	4.00084	1.45374e-07	0.999995	0.999474	0.187361	5.27015e-06	0.749526	1.7914e-06	0.000525524	0.250474	0.000135811	0.812639	0.999998	0.999864	2.82728	3.13988	3.00908	2.91677	4.3409e-16	1	0.999455	0.974729	3.81683e-12	0.00212954	4.26516e-11	0.000545137	0.99787	0.0299876
IL23A	51561	4.94582	4.90605	5.09445	4.98152	1.71956e-05	0.149567	0.997977	0.774461	0.850433	0.999996	0.983233	0.0020235	4.41128e-06	0.010876	0.225539	0.0167675	0.989124	5.04728	5.01444	5.17495	5.04344	4.88691e-05	0.0978285	0.998897	0.453619	0.902171	0.999975	0.845506	0.00110316	2.54232e-05	0.00128402	0.546381	0.154494	0.998716	2.4951	2.58187	2.67906	2.62589	0.418105	0.896216	0.971689	0.923036	0.103784	0.856037	0.694078	0.0283113	0.143963	0.313522
IL24	11009	5.66319	4.83585	4.51483	4.91204	8.7543e-10	4.15948e-06	5.53782e-09	0.000230926	0.999996	0.00199438	0.700062	1	0.998006	0.993542	0.999769	0.299938	0.00645836	4.91832	4.43406	4.25591	4.93717	1.75578e-09	4.74466e-06	8.64613e-09	0.549745	0.999995	0.0097321	0.999937	1	0.990268	1	0.450255	6.30793e-05	4.38388e-07	2.74554	2.69222	2.78331	2.81439	0.00066544	0.0713395	0.810605	0.954628	0.92866	0.994734	0.999907	0.189395	0.00526642	0.783561
IL25	64806	4.05895	4.10628	4.11721	4.1102	0.237536	0.963416	0.949061	0.937315	0.0365843	0.643085	0.55715	0.0509386	0.356915	0.423085	0.0626853	0.44285	0.576915	4.97806	5.02566	5.04691	4.97886	0.0107504	0.990465	0.992636	0.512944	0.00953506	0.799397	0.0169772	0.00736351	0.200603	0.0104316	0.487056	0.983023	0.989568	NA	NA	NA	NA	NA	NA	NA	NA	NA	NA	NA	NA	NA	NA
IL26	55801	2.63738	2.67075	2.73318	2.58712	0.0100116	0.784606	0.948884	0.12502	0.215394	0.907307	0.000811596	0.051116	0.0926926	0.00151426	0.87498	0.999188	0.998486	3.21327	3.22058	3.28298	3.12976	5.80836e-05	0.625675	0.947029	0.000118721	0.374325	0.930911	6.04749e-06	0.0529712	0.0690887	0.000224168	0.999881	0.999994	0.999776	NA	NA	NA	NA	NA	NA	NA	NA	NA	NA	NA	NA	NA	NA
IL27	246778	5.40004	5.41212	5.44005	5.30905	0.000502229	0.672238	0.896404	0.00903029	0.327762	0.865575	0.00109696	0.103596	0.134425	0.000249442	0.99097	0.998903	0.999751	6.1101	6.16171	6.18256	6.1032	0.0175673	0.984831	0.991241	0.411137	0.0151687	0.778602	0.0184532	0.00875908	0.221398	0.00947369	0.588863	0.981547	0.990526	1.43429	1.41249	1.52335	1.40558	0.0382747	0.303537	0.968355	0.256427	0.696463	0.998517	0.413433	0.031645	0.00148262	0.00126361
IFNL2	282616	3.88123	3.93014	3.94417	3.89733	0.271453	0.943871	0.944201	0.674841	0.0561285	0.659516	0.133657	0.0557991	0.340484	0.112469	0.325159	0.866343	0.887531	4.89782	4.96687	4.99217	4.86427	0.01143	0.979578	0.957326	0.201689	0.020422	0.685746	0.00321272	0.0426745	0.314254	0.0129634	0.798311	0.996787	0.987037	NA	NA	NA	NA	NA	NA	NA	NA	NA	NA	NA	NA	NA	NA
IFNL1	282618	4.02818	4.1265	4.12321	4.06847	0.023786	0.995649	0.98191	0.823404	0.00435114	0.463709	0.0448218	0.0180901	0.536291	0.10016	0.176596	0.955178	0.89984	4.49047	4.51205	4.54978	4.46411	0.0715752	0.818763	0.975747	0.183664	0.181237	0.909956	0.0408001	0.0242526	0.0900438	0.00500894	0.816336	0.9592	0.994991	NA	NA	NA	NA	NA	NA	NA	NA	NA	NA	NA	NA	NA	NA
IL32	9235	10.2336	9.93775	9.30084	10.0495	1.18776e-13	0.00274755	1.16366e-10	0.07302	0.997252	1.4808e-08	0.891664	1	1	1	0.92698	0.108336	1.12203e-08	10.144	9.81464	9.29775	9.82549	6.496e-10	0.000291967	6.15109e-10	0.00246836	0.999708	5.90285e-06	0.547137	1	0.999994	0.999972	0.997532	0.452863	2.80549e-05	4.56106	4.14362	3.89361	4.13622	2.63867e-10	1.45455e-05	1.01254e-08	1.97274e-05	0.999985	0.000889575	0.449568	1	0.99911	0.997965
IL33	90865	5.51155	5.91988	6.27419	6.32175	0.0047614	0.966766	0.99322	0.999497	0.0332336	0.912165	0.985979	0.00678027	0.0878353	0.567841	0.000503382	0.0140206	0.432159	6.22503	6.45208	6.64318	6.59628	0.408155	0.834123	0.905346	0.939961	0.165877	0.745003	0.764877	0.0946537	0.254997	0.436445	0.0600386	0.235123	0.563555	2.67546	2.64373	2.6493	2.76133	0.15253	0.336876	0.389313	0.866047	0.663124	0.531329	0.992405	0.610687	0.468671	0.936759
IL34	146433	6.38287	6.64315	6.56731	6.56378	5.32114e-06	1	0.996096	0.998043	4.2782e-07	0.093326	0.0540521	0.00390443	0.906674	0.479136	0.0019566	0.945948	0.520864	6.21114	6.40008	6.42943	6.27644	7.532e-05	0.999976	0.998421	0.8835	2.4212e-05	0.669071	0.00531269	0.00157858	0.330929	0.0199048	0.1165	0.994687	0.980095	NA	NA	NA	NA	NA	NA	NA	NA	NA	NA	NA	NA	NA	NA
IL36A	27179	3.95456	4.07999	4.08193	4.0611	0.012606	0.998734	0.991364	0.988868	0.0012662	0.517368	0.301483	0.00863574	0.482632	0.337056	0.0111323	0.698517	0.662944	4.92885	4.983	4.99824	4.89218	0.0079243	0.974141	0.960772	0.136728	0.0258593	0.658852	0.00204222	0.0392279	0.341148	0.00606404	0.863272	0.997958	0.993936	NA	NA	NA	NA	NA	NA	NA	NA	NA	NA	NA	NA	NA	NA
IL36B	27177	3.01998	3.10199	3.10415	3.07484	0.000206537	0.999995	0.999832	0.994041	5.20587e-06	0.541954	0.0773634	0.000167557	0.458046	0.10828	0.00595937	0.922637	0.89172	3.71808	3.75526	3.7543	3.71402	0.0175828	0.993447	0.967335	0.410502	0.00655259	0.479448	0.00803233	0.0326648	0.520552	0.029222	0.589498	0.991968	0.970778	NA	NA	NA	NA	NA	NA	NA	NA	NA	NA	NA	NA	NA	NA
IL36G	56300	3.53978	3.52322	3.56526	3.48431	0.214813	0.30531	0.737653	0.0646862	0.69469	0.892773	0.093421	0.262347	0.107227	0.0162875	0.935314	0.906579	0.983713	4.17123	4.09412	4.16833	4.15369	0.0142898	0.00388761	0.473361	0.312878	0.996112	0.974425	0.980578	0.526639	0.0255754	0.367618	0.687122	0.0194218	0.632382	1.64405	1.65168	1.78539	1.62182	0.00751611	0.567383	0.992349	0.326112	0.432617	0.997544	0.201693	0.00765066	0.00245606	0.000792449
IL37	27178	4.63478	4.60485	4.72472	4.60262	0.146102	0.288115	0.928684	0.284358	0.711885	0.992627	0.479059	0.0713156	0.00737298	0.00974309	0.715642	0.520941	0.990257	5.06973	4.94426	5.06863	4.98956	0.0119415	0.00472048	0.493957	0.0820032	0.99528	0.979532	0.866829	0.506043	0.0204682	0.12239	0.917997	0.133171	0.87761	NA	NA	NA	NA	NA	NA	NA	NA	NA	NA	NA	NA	NA	NA
IL1F10	84639	4.68546	4.72993	4.7369	4.6133	0.00102597	0.904724	0.912448	0.0279257	0.0952765	0.592999	4.69167e-05	0.0875517	0.407001	0.000170334	0.972074	0.999953	0.99983	4.84872	4.839	4.85321	4.78417	0.0743924	0.337294	0.549814	0.0145284	0.662706	0.665583	0.0181608	0.450186	0.334417	0.034987	0.985472	0.981839	0.965013	NA	NA	NA	NA	NA	NA	NA	NA	NA	NA	NA	NA	NA	NA
IL1R1	3554	5.61296	5.26386	5.20381	6.29953	1.48752e-69	1.1116e-09	2.24598e-09	1	1	0.122506	1	1	0.877494	1	2.45259e-19	7.42042e-41	2.82855e-36	5.99354	5.67816	5.63952	6.62455	2.51165e-48	2.10802e-08	3.81413e-07	1	1	0.257249	1	1	0.742751	1	1.28673e-16	1.25484e-32	1.52472e-26	3.44389	3.21159	3.25397	3.80119	9.00957e-60	8.46195e-08	7.72296e-05	1	1	0.88223	1	0.999923	0.11777	1
IL1R2	7850	7.35365	5.90733	7.65304	6.49654	4.96924e-34	4.71633e-18	0.924401	2.59738e-06	1	1	0.99997	0.0755995	2.69388e-16	6.14009e-08	0.999997	3.04061e-05	1	7.35786	5.9188	7.48617	6.67332	4.50117e-27	1.0692e-20	0.735	0.000184668	1	1	0.999996	0.265	6.71341e-13	0.000183897	0.999815	3.64125e-06	0.999816	4.81255	3.6693	4.63596	3.98955	5.59289e-29	1.34341e-11	0.176797	4.36869e-07	1	1	0.999992	0.823203	2.7538e-11	3.84228e-06
IL1RAP	3556	4.72433	4.51449	4.47436	4.6743	1.41859e-05	4.90304e-05	2.00559e-05	0.257665	0.999951	0.169879	0.992633	0.99998	0.830121	0.997462	0.742335	0.00736704	0.00253772	5.00735	4.88094	4.88975	4.97974	0.0185525	0.00293771	0.0266672	0.319529	0.997062	0.565929	0.97211	0.973333	0.434071	0.916476	0.680471	0.0278899	0.0835244	1.87283	1.6835	1.6435	1.82014	8.15459e-07	0.000300518	0.000128018	0.182719	0.999699	0.163087	0.999915	0.999872	0.836913	0.9999
IL1RAPL1	11141	3.44927	3.49278	3.48947	3.51883	0.166016	0.958968	0.893911	0.97575	0.0410316	0.451095	0.804441	0.106089	0.548905	0.789153	0.02425	0.195559	0.210847	4.16684	4.2512	4.24222	4.18443	0.000985878	0.999932	0.997243	0.772967	6.833e-05	0.374998	0.0044512	0.0027565	0.625002	0.0259633	0.227033	0.995549	0.974037	NA	NA	NA	NA	NA	NA	NA	NA	NA	NA	NA	NA	NA	NA
IL1RAPL2	26280	4.40108	4.47263	4.54267	4.37194	6.60279e-06	0.989878	0.999848	0.196646	0.0101224	0.985052	0.000107163	0.000151895	0.0149476	1.79795e-06	0.803354	0.999893	0.999998	4.97227	5.05994	5.05439	4.98066	0.00075736	0.999685	0.984631	0.614446	0.000315414	0.437129	0.00112091	0.0153692	0.562871	0.0265249	0.385554	0.998879	0.973475	NA	NA	NA	NA	NA	NA	NA	NA	NA	NA	NA	NA	NA	NA
IL1RL1	9173	4.68511	4.6625	4.71647	4.71282	0.0768682	0.172668	0.830044	0.812656	0.827332	0.97315	0.973969	0.169956	0.0268505	0.457322	0.187344	0.026031	0.542678	5.33393	5.31394	5.35431	5.34462	0.388937	0.162656	0.727073	0.653162	0.837344	0.895215	0.89	0.272927	0.104785	0.395779	0.346838	0.11	0.604221	2.79773	2.80236	2.88638	2.93427	0.00686841	0.534734	0.90008	0.987744	0.465266	0.938973	0.999008	0.0999198	0.0610273	0.783376
IL1RL2	8808	4.76573	4.83465	4.95488	4.71235	0.00363258	0.855474	0.991522	0.225562	0.144526	0.978889	0.0055715	0.00847849	0.0211108	0.00014154	0.774438	0.994428	0.999858	4.95654	5.1181	5.03758	4.86741	1.17597e-05	0.998915	0.89356	0.0435497	0.00108536	0.0914775	6.08737e-08	0.10644	0.908523	0.0027581	0.95645	1	0.997242	2.84079	2.87255	3.02583	2.78213	2.39182e-05	0.764597	0.999064	0.105182	0.235403	0.998695	0.00536617	0.000936284	0.00130535	3.81273e-06
IL1RN	3557	5.4546	4.60234	4.79492	5.00978	1.44486e-37	4.38053e-23	1.22271e-13	7.93065e-07	1	0.999458	1	1	0.000542214	0.995369	0.999999	1.03338e-08	0.00463104	5.85613	5.11941	5.31957	5.56659	4.24746e-33	3.68872e-22	4.38675e-10	0.00014963	1	0.999136	1	1	0.000864151	0.999204	0.99985	1.50008e-12	0.00079649	4.0481	3.759	3.98536	3.86843	1.54386e-11	2.32232e-09	0.147523	0.000204902	1	0.999996	0.999048	0.852477	3.96291e-06	0.0130572
IL2RA	3559	5.23037	4.81657	4.83833	5.06377	1.47987e-16	2.78197e-10	3.17064e-08	0.0135643	1	0.6916	0.999996	1	0.3084	0.999823	0.986436	3.51436e-06	0.000176952	5.13207	4.82133	4.84537	5.01301	6.04257e-14	1.45435e-09	5.36166e-07	0.0186131	1	0.738701	0.999999	0.999999	0.261299	0.999716	0.981387	7.76593e-07	0.000284029	2.85812	2.61965	2.70793	2.77752	1.99526e-05	3.68264e-05	0.0187654	0.103493	0.999963	0.944466	0.999797	0.981235	0.0555337	0.87259
IL2RB	3560	7.51082	6.58497	6.55618	7.00908	5.70091e-31	2.39116e-17	5.46552e-16	4.79781e-06	1	0.340149	1	1	0.659851	0.999999	0.999995	6.30284e-08	8.65258e-07	7.34289	6.51617	6.64988	6.84169	3.81126e-31	2.73027e-25	7.76802e-12	9.8114e-09	1	0.954456	0.999996	1	0.0455445	0.978086	1	3.6241e-06	0.0219144	2.78392	2.59906	2.63631	2.7154	0.00505837	0.00316766	0.0239663	0.167821	0.996832	0.765672	0.99328	0.976034	0.234328	0.916619
IL2RG	3561	8.53159	8.98454	8.39653	8.71514	1.6905e-05	0.999586	0.213636	0.875325	0.000414016	2.13684e-05	0.0153326	0.786364	0.999979	0.973797	0.124675	0.984667	0.0262034	8.54025	8.8799	8.34706	8.75469	0.000265419	0.999129	0.0758805	0.93454	0.000871145	1.12829e-05	0.163276	0.924119	0.999989	0.996152	0.0654599	0.836724	0.00384804	3.63157	3.84819	3.37037	3.58743	5.4948e-11	0.999534	0.000662673	0.275289	0.000465557	4.45596e-11	9.91113e-06	0.999337	1	0.997416
IL3RA	3563	5.3873	5.43009	5.23495	5.5584	2.22706e-07	0.826259	0.0030173	0.999433	0.173741	1.57622e-05	0.998898	0.996983	0.999984	1	0.000566699	0.00110215	1.78131e-09	5.96728	5.97014	5.9032	6.05847	0.024089	0.530218	0.119672	0.981594	0.469782	0.0925016	0.989133	0.880328	0.907498	0.997318	0.0184061	0.0108668	0.00268201	6.62644	6.59807	6.6656	6.80336	0.214438	0.417686	0.58449	0.890166	0.582314	0.678544	0.988374	0.41551	0.321456	0.816642
IL4R	3566	7.94807	7.89687	8.04701	8.19783	4.77251e-09	0.181254	0.933875	0.99994	0.818746	0.998899	1	0.066125	0.00110146	0.995897	6.03841e-05	1.78285e-10	0.00410268	8.03002	7.97437	8.15334	8.19244	1.79785e-05	0.0874167	0.974242	0.996684	0.912583	0.998507	0.999948	0.0257583	0.00149262	0.705856	0.00331633	5.24726e-05	0.294144	3.04913	3.0206	3.15102	3.1155	9.71392e-06	0.161278	0.993465	0.979997	0.838722	0.999866	0.999951	0.0065346	0.000134376	0.171454
IL5RA	3568	3.57914	3.57685	3.62144	3.58006	0.0188633	0.431114	0.99095	0.523514	0.568886	0.997965	0.601282	0.00904992	0.00203534	0.00858089	0.476486	0.398718	0.991419	4.25298	4.26797	4.25214	4.24577	0.33781	0.892053	0.480564	0.323728	0.107947	0.161147	0.061947	0.519436	0.838853	0.367806	0.676272	0.938053	0.632194	NA	NA	NA	NA	NA	NA	NA	NA	NA	NA	NA	NA	NA	NA
IL6R	3570	4.61347	4.32996	4.21711	4.60198	2.75885e-10	1.21867e-05	2.54473e-07	0.444571	0.999988	0.0208841	0.999979	1	0.979116	1	0.555429	2.05346e-05	4.24283e-07	5.00705	4.78279	4.96655	5.0993	3.84789e-07	1.09418e-05	0.287863	0.897032	0.999989	0.995926	0.999996	0.712137	0.00407409	0.940065	0.102968	4.19054e-06	0.0599352	2.99927	2.92259	3.07709	3.08006	2.52585e-05	0.0290655	0.941137	0.956305	0.970935	0.999854	0.999971	0.0588632	0.00014575	0.524565
IL6ST	3572	5.30946	5.09248	5.07489	5.5013	7.91684e-21	7.12224e-07	6.00945e-06	0.999503	0.999999	0.339048	1	0.999994	0.660952	1	0.000496889	3.16201e-14	2.08362e-12	5.96806	5.77084	5.72975	6.07515	1.6796e-12	1.1013e-06	2.41187e-06	0.969346	0.999999	0.17955	1	0.999998	0.82045	1	0.0306544	2.40235e-08	2.69157e-08	4.4045	4.15209	3.96986	4.76792	7.71417e-43	7.36208e-06	1.66387e-08	1	0.999993	0.00169666	1	1	0.998303	1
IL7R	3575	7.48789	6.98188	6.93992	7.57531	5.73334e-11	2.28345e-05	9.59834e-05	0.72657	0.999977	0.34172	1	0.999904	0.65828	0.999998	0.27343	4.44586e-08	1.64117e-06	7.36045	6.62859	6.86428	7.293	1.58591e-15	8.27076e-15	7.4464e-05	0.282227	1	0.974653	1	0.999926	0.0253469	0.998551	0.717773	5.99909e-09	0.00144928	3.99506	3.74719	3.79795	4.11019	1.37564e-06	0.00275657	0.0358628	0.873973	0.997243	0.726312	0.999999	0.964137	0.273688	0.999213
IL9R	3581	4.46645	4.49582	4.54058	4.46827	0.0919873	0.856497	0.986427	0.522203	0.143503	0.954664	0.140051	0.0135726	0.0453358	0.0116334	0.477797	0.859949	0.988367	5.12181	5.06681	5.10063	5.06303	0.017132	0.00297133	0.219608	0.0112325	0.997029	0.92025	0.430995	0.780392	0.0797502	0.0969045	0.988768	0.569005	0.903095	2.46692	2.38879	2.53712	2.45443	0.0231483	0.0486898	0.86596	0.404973	0.95131	0.9963	0.946278	0.13404	0.00370006	0.0806816
IL10RA	3587	6.71747	5.8194	5.7691	6.89212	6.46837e-44	1.22181e-14	1.08652e-12	0.927488	1	0.281721	1	1	0.718279	1	0.0725117	9.30422e-27	7.63351e-20	6.83885	5.93116	6.02877	6.93389	3.64831e-40	1.81197e-24	1.59366e-12	0.829299	1	0.857759	1	1	0.142241	1	0.170701	2.92718e-22	1.75502e-13	3.69535	3.01754	2.89058	3.85076	4.0174e-18	1.02648e-06	5.05241e-07	0.845595	0.999999	0.136057	1	0.999999	0.863943	1
IL10RB	3588	7.62945	7.64725	7.96434	7.72714	0.000103541	0.608347	0.999967	0.908487	0.391653	0.999991	0.903026	3.30471e-05	9.48605e-06	0.00154541	0.0915127	0.0969742	0.998455	7.87672	7.92505	8.07294	8.01685	0.107558	0.762735	0.975949	0.956548	0.237265	0.94757	0.898943	0.0240506	0.0524301	0.289805	0.0434522	0.101057	0.710195	4.20939	4.19086	4.3614	4.24534	5.58273e-05	0.29214	0.999127	0.835326	0.70786	0.999963	0.97364	0.000873391	3.66185e-05	0.00448471
IL11RA	3590	5.22435	5.16775	5.16954	5.4478	1.81506e-14	0.0505717	0.108799	0.999998	0.949428	0.519502	1	0.891201	0.480498	1	1.57388e-06	2.33569e-11	1.88203e-08	6.22616	6.1652	6.24625	6.29009	0.00103885	0.0100032	0.697422	0.940463	0.989997	0.98433	0.999111	0.302578	0.0156702	0.816358	0.0595372	0.000889328	0.183642	4.14727	4.30837	4.44391	4.31134	6.21595e-05	0.999785	1	0.999786	0.000214501	0.993942	0.529736	4.84198e-07	0.00605792	0.0076336
IL12RB1	3594	5.23535	5.04591	5.10083	5.08728	1.52051e-06	1.20804e-05	0.00477089	0.00104278	0.999988	0.936435	0.917404	0.995229	0.0635649	0.369978	0.998957	0.0825958	0.630022	5.70199	5.46405	5.54406	5.51419	3.43932e-12	3.63658e-11	0.000669479	5.05287e-06	1	0.9752	0.941819	0.999331	0.0247998	0.260886	0.999995	0.0581812	0.739114	NA	NA	NA	NA	NA	NA	NA	NA	NA	NA	NA	NA	NA	NA
IL12RB2	3595	3.54065	3.34073	3.32673	3.35422	1.16235e-07	7.57173e-06	1.18622e-05	0.000115154	0.999992	0.328846	0.661659	0.999988	0.671154	0.762037	0.999885	0.338341	0.237963	3.80691	3.69265	3.72605	3.76854	0.000204351	1.51245e-05	0.010766	0.150012	0.999985	0.868474	0.990016	0.989234	0.131526	0.860373	0.849988	0.00998425	0.139627	1.96285	1.89165	1.978	1.91265	0.173019	0.0596861	0.597674	0.15203	0.940314	0.953843	0.726405	0.402326	0.0461567	0.113262
IL13RA1	3597	7.75651	7.55356	7.77686	7.7227	0.00429626	0.00359391	0.576098	0.341761	0.996406	0.990675	0.994445	0.423902	0.00932473	0.294615	0.658239	0.00555482	0.705385	8.13	7.86716	8.19479	7.96794	0.000272056	0.00035214	0.730326	0.0359211	0.999648	0.999581	0.906166	0.269674	0.000419143	0.0166507	0.964079	0.0938341	0.983349	4.91138	4.98306	5.00657	4.99388	0.394898	0.906234	0.907548	0.933086	0.0937662	0.654865	0.615936	0.0924524	0.345135	0.415606
IL13RA2	3598	4.22774	4.3698	4.10334	4.07315	0.100656	0.820995	0.256645	0.196563	0.179005	0.0368703	0.0149246	0.743355	0.96313	0.431644	0.803437	0.985075	0.568356	4.26353	4.51904	4.3785	4.31847	0.0832414	0.991484	0.773922	0.679372	0.00851564	0.168639	0.0335839	0.226078	0.831361	0.348889	0.320628	0.966416	0.651111	1.97362	1.99091	1.94917	1.9899	0.907548	0.609051	0.361644	0.596709	0.390949	0.208919	0.491568	0.638356	0.791081	0.765146
IL15RA	3601	7.79567	7.32694	7.24953	7.43365	1.73252e-16	3.33206e-12	5.16384e-13	7.0153e-07	1	0.0672085	0.973622	1	0.932791	0.997868	0.999999	0.0263782	0.00213206	7.39229	6.97458	6.88353	7.00609	2.37998e-17	6.53693e-13	8.72619e-12	4.52616e-09	1	0.057699	0.728889	1	0.942301	0.966193	1	0.271111	0.0338067	4.00342	3.8207	3.91569	3.83879	1.39407e-05	2.54295e-06	0.0320837	5.16425e-05	0.999997	0.992422	0.717967	0.967916	0.00757792	0.032804
IL17RA	23765	6.66411	6.40694	6.33344	6.5728	5.61316e-18	1.892e-11	2.9387e-13	0.0192154	1	0.0117802	0.999998	1	0.98822	1	0.980785	1.96821e-06	1.46548e-08	6.78612	6.6202	6.62148	6.71432	7.85452e-09	2.65254e-09	2.60495e-05	0.018465	1	0.514359	0.998935	0.999974	0.485641	0.987255	0.981535	0.00106476	0.0127447	2.92068	2.8892	2.90058	2.93849	0.352492	0.153297	0.310887	0.698405	0.846703	0.622073	0.953904	0.689113	0.377927	0.830505
IL17RB	55540	8.29638	8.26308	8.0665	7.29512	3.84343e-19	0.38622	0.0548908	7.56456e-12	0.61378	0.0405967	1.98876e-16	0.945109	0.959403	3.37787e-08	1	1	1	7.73667	7.87065	7.6938	7.27222	1.00826e-07	0.916538	0.373978	1.95815e-05	0.0834622	0.0732355	1.12755e-09	0.626022	0.926765	0.000928386	0.99998	1	0.999072	4.4859	4.6633	4.31617	4.32626	5.78211e-08	0.985568	0.0481248	0.0305624	0.0144322	2.43657e-05	2.33021e-08	0.951875	0.999976	0.546405
IL17RC	84818	6.05123	5.93917	6.0696	5.95056	8.015e-07	2.59904e-05	0.70336	0.00135616	0.999974	0.999993	0.662301	0.29664	7.24027e-06	0.000373045	0.998644	0.337699	0.999627	6.3389	6.22585	6.33213	6.17166	1.42679e-09	2.98911e-06	0.416824	1.80201e-08	0.999997	0.999726	0.0198463	0.583176	0.000274101	2.66347e-06	1	0.980154	0.999997	2.2535	2.26399	2.46234	2.27614	3.79611e-05	0.600008	0.999774	0.694368	0.399992	0.99994	0.645793	0.000226257	6.0309e-05	0.000260796
IL17RD	54756	4.32458	4.49251	4.75597	4.83742	7.14597e-08	0.968644	0.999931	0.999999	0.0313559	0.998461	0.999996	6.87133e-05	0.00153885	0.794494	5.28779e-07	4.1768e-06	0.205506	5.05236	5.2904	5.44867	5.49418	1.36604e-05	0.998873	0.999459	0.999998	0.00112728	0.920407	0.991768	0.000540626	0.0795927	0.645224	1.54057e-06	0.00823213	0.354776	3.91084	3.91302	4.04062	4.06504	0.0090112	0.513421	0.955096	0.988317	0.486579	0.980744	0.998776	0.0449041	0.0192561	0.648878
IL17RE	132014	4.18028	4.31565	4.2972	4.15706	1.06767e-09	0.999998	0.998943	0.243421	2.12443e-06	0.281945	1.27001e-08	0.00105686	0.718055	9.1026e-05	0.756579	1	0.999909	4.29399	4.38366	4.35413	4.25507	4.60366e-08	0.999992	0.973793	0.0703325	8.04092e-06	0.153705	1.86465e-07	0.0262067	0.846295	0.00178741	0.929667	1	0.998213	3.34412	3.48458	3.58618	3.30764	1.45023e-06	0.996773	0.99981	0.242179	0.00322704	0.957039	1.38348e-05	0.000189969	0.042961	3.99997e-06
IL18BP	10068	5.98964	5.62271	5.60123	5.96863	1.51545e-28	2.76046e-11	5.99187e-11	0.358555	1	0.263055	1	1	0.736945	1	0.641445	2.46412e-16	3.26107e-14	5.96484	5.73157	5.75343	5.86989	4.2105e-10	2.52286e-09	3.81529e-05	0.0168163	1	0.688687	0.999919	0.999962	0.311313	0.989185	0.983184	8.12717e-05	0.0108147	3.48431	3.46091	3.7027	3.47011	5.418e-08	0.289024	0.999966	0.376021	0.710976	1	0.616564	3.38171e-05	4.7192e-08	4.55854e-07
IL18R1	8809	4.16962	3.81098	3.75775	4.00478	1.08698e-08	1.62868e-06	9.97012e-07	0.0315127	0.999998	0.177486	0.998446	0.999999	0.822514	0.999361	0.968487	0.00155352	0.00063927	4.75413	4.46496	4.52426	4.59606	4.15331e-06	6.13639e-08	0.00112204	0.0165842	1	0.814724	0.97522	0.998878	0.185276	0.804151	0.983416	0.0247803	0.195849	1.64466	1.47525	1.48105	1.53686	0.0497221	0.00909274	0.0285634	0.0694634	0.990907	0.53525	0.902903	0.971437	0.46475	0.79592
IL18RAP	8807	5.16544	4.7163	4.7576	4.9615	2.2971e-17	2.21263e-12	1.23803e-09	0.00461516	1	0.844674	0.999962	1	0.155326	0.998852	0.995385	3.84147e-05	0.00114792	5.64707	5.10403	5.16783	5.29606	1.01967e-21	2.10257e-16	2.0318e-09	7.20933e-07	1	0.857162	0.999837	1	0.142838	0.964084	0.999999	0.000163034	0.0359155	NA	NA	NA	NA	NA	NA	NA	NA	NA	NA	NA	NA	NA	NA
IL20RA	53832	5.18565	5.56414	5.62477	5.24949	6.59192e-12	1	1	0.775587	2.11303e-08	0.824142	4.86427e-06	1.30339e-07	0.175858	7.6936e-06	0.224413	0.999995	0.999992	5.6968	6.04049	5.84677	5.73177	1.24981e-09	1	0.982511	0.672389	2.54694e-09	0.000949919	9.51982e-06	0.0174887	0.99905	0.0799758	0.327611	0.99999	0.920024	3.67779	3.78928	3.62964	3.54277	3.88462e-05	0.941394	0.284494	0.0419678	0.0586059	0.00576433	2.26405e-06	0.715506	0.994236	0.108201
IL20RB	53833	4.01219	3.8246	3.90924	3.87865	0.00140351	0.000316589	0.0939205	0.0180646	0.999683	0.907794	0.889073	0.906079	0.0922061	0.335278	0.981935	0.110927	0.664722	4.20492	4.10451	4.16603	4.17369	0.176274	0.0231397	0.247727	0.317707	0.97686	0.911663	0.890814	0.752273	0.0883365	0.548961	0.682293	0.109186	0.451039	2.46418	2.43738	2.46348	2.48391	0.783882	0.314389	0.496067	0.6296	0.685611	0.668512	0.844608	0.503933	0.331488	0.625598
IL21R	50615	4.25456	3.79006	3.77876	4.17198	6.18198e-24	4.08751e-10	1.55963e-09	0.157201	1	0.389865	1	1	0.610135	1	0.842799	2.37129e-11	6.15359e-10	4.79366	4.39575	4.41878	4.68297	2.80172e-25	3.15691e-18	5.34271e-13	0.023006	1	0.738933	1	1	0.261067	0.999999	0.976994	1.9659e-09	5.97431e-07	NA	NA	NA	NA	NA	NA	NA	NA	NA	NA	NA	NA	NA	NA
IL22RA1	58985	6.88679	7.55543	6.84411	6.75653	1.74275e-22	1	0.378585	0.161521	5.29215e-10	2.38954e-09	5.52631e-13	0.621415	1	0.263116	0.838479	1	0.736884	6.66066	7.49453	6.89871	6.96006	1.27859e-19	1	0.956673	0.993627	5.56965e-18	3.75934e-06	2.43964e-07	0.043327	0.999996	0.661719	0.00637327	1	0.338281	2.82728	3.13988	3.00908	2.91677	4.3409e-16	1	0.999455	0.974729	3.81683e-12	0.00212954	4.26516e-11	0.000545137	0.99787	0.0299876
IL22RA2	116379	3.31474	3.26505	3.25386	3.27788	0.181924	0.0507229	0.0418573	0.131363	0.949277	0.326766	0.722269	0.958143	0.673234	0.803224	0.868637	0.277731	0.196776	3.63436	3.60338	3.62288	3.61323	0.470088	0.0511747	0.351186	0.190552	0.948825	0.752661	0.671821	0.648814	0.247339	0.382143	0.809448	0.328179	0.617857	NA	NA	NA	NA	NA	NA	NA	NA	NA	NA	NA	NA	NA	NA
IL27RA	9466	5.61803	5.17535	5.56536	5.37432	7.40598e-11	1.78727e-08	0.286326	0.00176098	1	0.999999	0.999241	0.713674	6.02378e-07	0.0108606	0.998239	0.000759182	0.989139	6.10892	5.70206	6.12727	5.83654	8.22413e-09	1.39185e-08	0.57859	0.000706977	1	0.999998	0.956044	0.42141	2.45652e-06	0.0018994	0.999293	0.0439557	0.998101	4.0694	3.748	4.05012	3.90023	9.8458e-06	3.68712e-05	0.425245	0.0196341	0.999963	0.999716	0.99521	0.574755	0.000283958	0.0450407
IFNLR1	163702	6.09683	6.42184	6.11341	6.10337	2.07155e-15	1	0.59531	0.539266	3.30124e-09	1.11952e-07	5.11831e-09	0.40469	1	0.441937	0.460734	1	0.558063	6.02678	6.46393	6.11677	6.24707	1.44979e-18	1	0.889554	0.999916	5.74801e-16	6.18537e-07	3.94263e-06	0.110446	0.999999	0.964663	8.39473e-05	0.999996	0.0353373	2.93034	3.28207	3.06401	3.02938	1.26397e-15	1	0.988428	0.974807	1.69704e-12	1.00604e-05	2.47694e-10	0.011572	0.99999	0.257466
IL31RA	133396	2.93506	2.91967	2.93054	2.90455	0.292363	0.173203	0.401239	0.0565195	0.826797	0.799735	0.147559	0.598761	0.200265	0.0571202	0.943481	0.852441	0.94288	3.67605	3.66803	3.67841	3.65564	0.489958	0.2644	0.559308	0.0833985	0.7356	0.75918	0.180307	0.440692	0.24082	0.0844194	0.916602	0.819693	0.915581	NA	NA	NA	NA	NA	NA	NA	NA	NA	NA	NA	NA	NA	NA
IL36RN	26525	3.25338	3.26627	3.32354	3.24585	0.0472345	0.702607	0.976268	0.387528	0.297393	0.969152	0.147825	0.0237322	0.0308481	0.00844549	0.612472	0.852175	0.991555	4.18744	4.16449	4.20333	4.15583	0.31848	0.130863	0.692503	0.134458	0.869137	0.910432	0.366387	0.307497	0.0895678	0.0878274	0.865542	0.633613	0.912173	NA	NA	NA	NA	NA	NA	NA	NA	NA	NA	NA	NA	NA	NA
PDCD1	5133	5.57587	5.63339	5.69037	5.60962	0.045731	0.961432	0.994786	0.793267	0.0385685	0.936303	0.239918	0.00521429	0.0636971	0.0374434	0.206733	0.760082	0.962557	5.57336	5.60337	5.65115	5.54564	0.050804	0.848702	0.970384	0.21937	0.151298	0.902384	0.0315506	0.0296161	0.0976162	0.00683609	0.78063	0.968449	0.993164	NA	NA	NA	NA	NA	NA	NA	NA	NA	NA	NA	NA	NA	NA
CD274	29126	5.8527	4.89059	4.93049	5.34422	2.58318e-42	3.76095e-21	7.42814e-19	5.78962e-07	1	0.775332	1	1	0.224668	1	0.999999	1.06825e-09	3.10916e-07	6.21811	5.25488	5.4125	5.60465	1.20877e-39	1.76821e-22	2.10665e-15	9.046e-11	1	0.995849	1	1	0.00415102	0.996661	1	1.4707e-09	0.00333854	2.21586	2.03701	2.04217	2.07708	0.000171445	0.0001964	0.000898527	0.00477493	0.999804	0.557615	0.888508	0.999101	0.442385	0.803164
PDCD1LG2	80380	3.90537	3.64716	3.58869	3.87476	1.12182e-19	2.06343e-08	1.37656e-10	0.291388	1	0.00703994	1	1	0.99296	1	0.708612	3.33287e-08	1.5038e-10	4.38872	4.28878	4.29209	4.39579	0.000118903	0.000572178	0.00571697	0.570215	0.999428	0.54505	0.999437	0.994283	0.45495	0.995388	0.429785	0.000563318	0.00461243	NA	NA	NA	NA	NA	NA	NA	NA	NA	NA	NA	NA	NA	NA
NCR3LG1	374383	6.73348	7.21564	6.65026	6.19843	1.68401e-21	0.999993	0.24506	6.86063e-05	6.76818e-06	3.78287e-09	6.52965e-16	0.75494	1	0.000215647	0.999931	1	0.999784	7.00415	7.63466	7.20167	6.89037	9.43772e-15	1	0.940017	0.176515	4.08288e-10	8.28433e-05	3.10575e-11	0.0599827	0.999917	0.0100687	0.823485	1	0.989931	NA	NA	NA	NA	NA	NA	NA	NA	NA	NA	NA	NA	NA	NA
HAVCR2	84868	5.28272	4.69646	4.65086	5.165	2.57202e-40	1.88402e-16	1.82058e-17	0.0632879	1	0.0868512	1	1	0.913149	1	0.936712	1.86196e-14	2.42434e-15	5.56418	5.06225	5.04658	5.52636	3.69382e-45	1.4761e-23	5.69468e-21	0.24374	1	0.316378	1	1	0.683622	1	0.75626	5.37978e-20	3.12513e-18	4.3146	3.29553	2.97844	4.10618	2.02228e-29	1.78409e-12	9.02952e-17	0.0789311	1	0.000402987	1	1	0.999597	1
HAVCR1	26762	3.35052	3.75738	4.06767	3.29969	2.75633e-05	0.997372	0.99981	0.36163	0.00262776	0.956771	7.58083e-05	0.000189888	0.0432286	2.04285e-05	0.63837	0.999924	0.99998	3.67672	4.13245	4.06144	3.73568	1.47074e-05	0.999999	0.997369	0.754996	1.2247e-06	0.312444	6.5686e-05	0.00263147	0.687556	0.0107493	0.245004	0.999934	0.989251	2.21654	2.3602	2.49483	2.2755	2.4841e-05	0.998499	0.999958	0.893983	0.00150086	0.984441	0.00995348	4.20023e-05	0.0155587	0.000260854
TIMD4	91937	3.22947	3.13065	3.20965	3.22745	0.00615118	0.00907855	0.334129	0.484093	0.990921	0.992643	0.993794	0.665871	0.00735654	0.658641	0.515907	0.00620593	0.341359	3.99477	3.99128	3.98998	4.0605	0.245034	0.448864	0.440523	0.900055	0.551136	0.482861	0.915744	0.559477	0.517139	0.908283	0.099945	0.084256	0.0917165	1.68526	1.64049	1.77487	1.63135	0.0497514	0.193663	0.897659	0.165699	0.806337	0.987796	0.40889	0.102341	0.0122036	0.011267
LGALS1	3956	11.2663	10.5785	10.0137	12.0021	5.5882e-69	8.43573e-15	2.4228e-19	1	1	3.24519e-07	1	1	1	1	1.51485e-14	9.89344e-50	5.66541e-34	11.2341	10.5185	10.1911	11.9743	3.90876e-60	6.52225e-17	7.28778e-13	1	1	0.00388076	1	1	0.996119	1	2.53025e-18	9.30876e-58	2.10479e-23	6.9845	6.57188	6.51731	7.4555	1.84895e-55	3.38198e-08	4.61576e-07	1	1	0.221353	1	1	0.778647	1
LGALS9	3965	8.10292	7.95803	8.28309	7.93953	0.000694643	0.0552446	0.961335	0.0582638	0.944755	0.999992	0.403297	0.0386654	7.92795e-06	7.64898e-05	0.941736	0.596703	0.999924	8.4284	8.19653	8.43649	8.01177	2.59142e-06	0.00204164	0.533887	6.44958e-06	0.997958	0.998473	0.00843482	0.466113	0.00152708	5.14581e-06	0.999994	0.991565	0.999995	4.76973	4.67216	4.83699	4.63735	2.65873e-05	0.0208381	0.885322	0.00316414	0.979162	0.999923	0.128873	0.114678	7.69414e-05	3.4231e-06
LAG3	3902	5.03243	4.25477	4.2278	4.49211	2.05803e-29	1.51528e-14	1.68461e-14	1.00885e-07	1	0.295833	0.999943	1	0.704167	0.99993	1	5.68315e-05	7.00732e-05	5.34616	4.6801	4.74115	4.81516	6.06686e-30	8.46609e-19	8.42102e-13	3.00164e-11	1	0.866524	0.995078	1	0.133476	0.861502	1	0.0049224	0.138498	NA	NA	NA	NA	NA	NA	NA	NA	NA	NA	NA	NA	NA	NA
ICOSLG	23308	5.50972	5.3764	5.37461	5.37047	8.38885e-06	1.54291e-05	0.000246135	7.45961e-05	0.999985	0.475566	0.411483	0.999754	0.524434	0.452314	0.999925	0.588517	0.547686	5.82619	5.73622	5.75439	5.71535	0.000311675	0.00018507	0.0233338	0.000151566	0.999815	0.715607	0.205612	0.976666	0.284393	0.14054	0.999848	0.794388	0.85946	5.43458	5.40772	5.29394	5.31121	0.291084	0.384114	0.111377	0.0991079	0.615886	0.107618	0.0697116	0.888623	0.892382	0.571434
VTCN1	79679	3.59762	3.52329	3.63564	3.57805	0.0280184	0.0347198	0.755133	0.35451	0.96528	0.994129	0.91134	0.244867	0.00587134	0.147347	0.64549	0.08866	0.852653	4.70916	4.59368	4.71092	4.67492	0.00754572	0.00133391	0.512927	0.266687	0.998666	0.993456	0.957909	0.487073	0.00654369	0.277228	0.733313	0.0420908	0.722772	NA	NA	NA	NA	NA	NA	NA	NA	NA	NA	NA	NA	NA	NA
IDO1	3620	7.97202	6.21163	6.01703	6.56357	1.4123e-28	9.27175e-14	2.62292e-14	4.25405e-09	1	0.0796195	0.995561	1	0.92038	0.999228	1	0.00443924	0.000772389	7.96539	6.32563	6.62061	6.65335	9.79018e-20	4.54311e-13	2.64352e-07	2.3836e-08	1	0.945593	0.989062	1	0.0544067	0.562736	1	0.0109378	0.437264	4.65948	3.11761	3.06225	3.35365	4.74209e-23	2.9189e-09	4.47459e-09	3.21678e-07	1	0.325217	0.993287	1	0.674783	0.984329
TDO2	6999	4.7647	4.19646	4.04341	4.82322	1.01817e-20	1.63773e-12	4.70161e-10	0.732542	1	0.0623021	1	1	0.937698	1	0.267458	1.48548e-12	1.20165e-10	5.07619	4.8354	4.6235	5.20934	1.39192e-07	0.000514956	3.15242e-05	0.932353	0.999485	0.0263138	0.999976	0.999968	0.973686	0.999998	0.0676474	2.44584e-05	1.71001e-06	1.38261	1.26572	1.28818	1.32095	0.0377975	0.00780283	0.0452669	0.113282	0.992197	0.711216	0.949713	0.954733	0.288784	0.771611
PTGS1	5742	5.7817	5.57525	5.60431	6.44384	4.84869e-26	0.00662444	0.036886	1	0.993376	0.652616	1	0.963114	0.347384	1	4.38106e-09	1.12951e-17	7.25398e-14	5.63824	5.64422	5.73772	6.18542	1.90424e-14	0.546855	0.904552	1	0.453145	0.88964	1	0.095448	0.11036	0.999986	2.27719e-09	3.3288e-09	1.37698e-05	4.17912	4.12934	4.12543	4.65438	5.41347e-22	0.184132	0.216825	1	0.815868	0.472872	1	0.783175	0.527128	1
PTGS2	5743	6.51913	4.92396	5.43042	5.87268	2.34285e-16	4.35031e-12	3.66187e-05	0.00483259	1	0.992462	1	0.999963	0.00753844	0.965144	0.995167	1.81056e-07	0.0348564	6.4125	4.76498	5.44036	6.08089	3.65574e-21	3.0449e-16	0.000144406	0.0793675	1	0.998649	1	0.999856	0.00135103	0.99185	0.920633	4.88884e-11	0.00814989	5.92427	4.85545	4.98381	5.57029	2.70949e-18	2.43283e-10	2.67064e-07	0.0158031	1	0.84815	1	1	0.15185	0.99999
PTGES2	80142	7.99837	7.90964	7.9862	7.68068	3.16552e-11	0.0179643	0.405549	1.33389e-09	0.982036	0.96552	6.49034e-08	0.594451	0.0344803	5.35629e-09	1	1	1	8.1495	7.99854	8.10261	7.73051	2.15642e-15	0.000242157	0.208938	1.44311e-14	0.999758	0.973691	8.44633e-09	0.791062	0.0263087	4.49563e-09	1	1	1	5.56883	5.49742	5.72159	5.44407	8.12733e-09	0.0489655	0.998158	0.00344294	0.951034	1	0.0492635	0.00184183	9.78238e-08	1.07637e-09
CD47	961	7.42304	7.16142	7.04379	7.00342	1.33577e-12	1.83454e-05	8.28514e-08	2.7531e-09	0.999982	0.00555122	0.000206797	1	0.994449	0.229307	1	0.999793	0.770693	7.75642	7.66624	7.63322	7.57656	0.00345053	0.0245142	0.0127602	0.000309635	0.975486	0.238684	0.0189275	0.98724	0.761316	0.140542	0.99969	0.981072	0.859458	4.80414	4.85038	4.47109	4.6847	1.63198e-09	0.790942	7.08461e-06	0.0243993	0.209058	9.33224e-09	0.00014402	0.999993	1	0.999292
TLR1	7096	4.48825	3.52182	3.53572	4.59481	1.68703e-43	7.83505e-16	2.68422e-14	0.784926	1	0.582865	1	1	0.417135	1	0.215074	2.05646e-19	1.55225e-17	4.84255	4.0984	4.31296	5.10713	1.83669e-36	1.13025e-16	1.59204e-06	0.993729	1	0.992464	1	0.999998	0.00753561	1	0.00627077	5.52365e-23	2.59338e-11	2.17637	2.05273	2.1605	2.25707	3.45858e-14	1.0138e-05	0.332531	0.992693	0.99999	0.9996	1	0.667469	0.000400328	0.996309
TLR2	7097	7.11575	6.27155	5.97929	7.19758	2.25398e-44	6.36228e-17	9.44965e-22	0.755704	1	3.90453e-05	1	1	0.999961	1	0.244296	1.71499e-17	2.32536e-22	6.51512	5.86672	5.74527	6.59417	4.75178e-33	2.40195e-16	5.31178e-14	0.8106	1	0.0540632	1	1	0.945937	1	0.1894	1.80627e-18	7.68325e-16	3.67154	3.2811	3.22835	3.60925	7.03975e-11	3.5531e-06	1.55415e-05	0.244549	0.999996	0.250299	1	0.999984	0.749701	0.999991
TLR3	7098	5.87764	5.07034	5.58059	5.21648	2.36603e-11	5.89967e-08	0.042757	2.22253e-05	1	0.999967	0.925628	0.957243	3.33156e-05	0.00488613	0.999978	0.0743721	0.995114	6.24985	5.49854	5.95081	5.64661	3.28087e-10	9.40879e-11	0.0250402	1.38302e-05	1	0.99937	0.884967	0.97496	0.000629681	0.0294353	0.999986	0.115033	0.970565	2.10387	1.77583	1.77272	1.83161	2.00214e-06	1.86041e-05	0.000121286	0.000464934	0.999981	0.479144	0.879991	0.999879	0.520856	0.817943
TLR4	7099	4.74186	4.84047	5.3455	5.47141	2.59873e-12	0.869699	0.999987	1	0.130301	0.999898	1	1.2996e-05	0.000101626	0.804814	1.8004e-10	1.67726e-09	0.195186	5.00188	5.16912	5.56892	5.54909	3.85027e-07	0.976097	0.999966	1	0.023903	0.997705	0.999749	3.37604e-05	0.00229496	0.447256	1.9894e-07	0.000251044	0.552744	1.69778	1.74968	1.87817	1.84674	0.00545688	0.883897	0.998149	0.999448	0.116103	0.984722	0.989503	0.00185105	0.0152776	0.300394
TLR5	7100	5.168	4.79267	5.11481	5.40254	2.25399e-28	1.23391e-10	0.230052	0.999218	1	1	1	0.769948	1.45052e-07	0.999895	0.000781539	1.37025e-18	0.000105406	5.67343	5.3753	5.76415	5.93146	1.48354e-21	1.3044e-09	0.885855	0.999628	1	1	1	0.114145	1.08171e-07	0.969553	0.000372488	1.6689e-13	0.0304467	5.36704	4.91185	5.0401	5.28031	9.34811e-09	7.1201e-07	0.00255739	0.188619	0.999999	0.914504	1	0.997443	0.0854955	0.990606
TLR6	10333	3.7649	3.66751	3.72541	3.76039	4.9408e-05	6.22265e-05	0.100679	0.44664	0.999938	0.988473	0.999289	0.899321	0.0115267	0.848011	0.55336	0.000710582	0.151989	4.67102	4.55588	4.62062	4.71836	9.41499e-13	3.10725e-07	0.0372631	0.959671	1	0.996183	1	0.962737	0.00381683	0.999641	0.0403292	1.10773e-11	0.000359133	NA	NA	NA	NA	NA	NA	NA	NA	NA	NA	NA	NA	NA	NA
TLR7	51284	4.04074	3.81855	3.79683	4.25447	1.49439e-23	1.65687e-05	1.20165e-05	0.998683	0.999983	0.248523	1	0.999988	0.751477	1	0.00131698	2.72213e-13	3.38297e-13	4.57888	4.49507	4.50039	4.81328	1.59248e-18	0.00254928	0.0273898	0.999997	0.997451	0.565362	1	0.97261	0.434638	1	2.93384e-06	3.69152e-11	6.38735e-09	2.10064	2.07267	2.12916	2.06753	0.344847	0.219048	0.725095	0.190195	0.780952	0.922326	0.423524	0.274905	0.0776743	0.0677402
TLR8	51311	4.56173	3.73599	3.71377	4.46684	1.04106e-37	1.63255e-15	4.7246e-15	0.20059	1	0.342481	1	1	0.657519	1	0.79941	1.35606e-15	1.01834e-14	5.01427	4.36588	4.40604	4.96906	1.86788e-31	1.60831e-17	1.09265e-12	0.297739	1	0.761041	1	1	0.238959	1	0.702261	3.15056e-16	1.18404e-11	1.42571	1.33215	1.35834	1.51689	8.57905e-07	0.0164839	0.0959667	0.961396	0.983516	0.759773	0.999999	0.904033	0.240227	0.999642
TLR9	54106	4.9094	4.94781	4.96519	4.92953	0.66588	0.828688	0.885043	0.671028	0.171312	0.677549	0.308616	0.114957	0.322451	0.204014	0.328972	0.691384	0.795986	5.11674	5.06713	5.123	5.09128	0.286396	0.0458012	0.562624	0.236717	0.954199	0.930815	0.768179	0.437376	0.0691852	0.227644	0.763283	0.231821	0.772356	NA	NA	NA	NA	NA	NA	NA	NA	NA	NA	NA	NA	NA	NA
IFNA1	3439	2.62788	2.67837	2.66344	2.63913	0.0631494	0.988658	0.893805	0.681089	0.0113421	0.269745	0.0187256	0.106195	0.730255	0.175763	0.318911	0.981274	0.824237	3.25174	3.25299	3.28243	3.23499	0.130225	0.536916	0.935095	0.145536	0.463084	0.93538	0.11113	0.0649052	0.0646195	0.0127586	0.854464	0.88887	0.987241	NA	NA	NA	NA	NA	NA	NA	NA	NA	NA	NA	NA	NA	NA
IFNA2	3440	2.88416	2.83466	2.87734	2.81374	0.00337847	0.009112	0.390923	0.00110064	0.990888	0.983899	0.11223	0.609077	0.0161012	0.00197068	0.998899	0.88777	0.998029	3.36022	3.35096	3.36703	3.33582	0.313526	0.230148	0.64302	0.0603071	0.769852	0.815065	0.153878	0.35698	0.184935	0.0620367	0.939693	0.846122	0.937963	NA	NA	NA	NA	NA	NA	NA	NA	NA	NA	NA	NA	NA	NA
IFNA4	3441	3.33624	3.36589	3.39094	3.3598	0.407816	0.883353	0.961794	0.798714	0.116647	0.823723	0.399412	0.0382057	0.176277	0.149747	0.201286	0.600588	0.850253	4.22253	4.25066	4.23393	4.18197	0.0690882	0.884609	0.64204	0.086778	0.115391	0.286173	0.00735743	0.35796	0.713827	0.0684014	0.913222	0.992643	0.931599	NA	NA	NA	NA	NA	NA	NA	NA	NA	NA	NA	NA	NA	NA
IFNA5	3442	2.52745	2.55074	2.57498	2.50023	0.00364828	0.902272	0.970312	0.0881521	0.0977277	0.866292	0.000815421	0.0296884	0.133708	0.000953005	0.911848	0.999185	0.999047	3.25817	3.28554	3.26024	3.23746	0.0409292	0.954657	0.536922	0.140014	0.0453434	0.115475	0.00345777	0.463078	0.884525	0.165757	0.859986	0.996542	0.834243	NA	NA	NA	NA	NA	NA	NA	NA	NA	NA	NA	NA	NA	NA
IFNA6	3443	3.17004	3.23263	3.22822	3.19171	0.0181203	0.998479	0.987159	0.817318	0.00152086	0.42463	0.0262985	0.0128405	0.57537	0.0805381	0.182682	0.973701	0.919462	3.46954	3.46032	3.46576	3.435	0.148312	0.237881	0.420887	0.0113464	0.762119	0.616591	0.0388484	0.579113	0.383409	0.0620139	0.988654	0.961152	0.937986	NA	NA	NA	NA	NA	NA	NA	NA	NA	NA	NA	NA	NA	NA
IFNA7	3444	3.47961	3.47195	3.49834	3.47424	0.828725	0.390017	0.708001	0.435229	0.609983	0.831289	0.53537	0.291999	0.168711	0.232332	0.564771	0.46463	0.767668	4.35887	4.46244	4.45349	4.3959	0.000200889	0.999988	0.997446	0.893517	1.21126e-05	0.387856	0.00878897	0.00255394	0.612144	0.0551885	0.106483	0.991211	0.944811	NA	NA	NA	NA	NA	NA	NA	NA	NA	NA	NA	NA	NA	NA
IFNA8	3445	2.57618	2.56944	2.60879	2.55682	0.100017	0.35473	0.928476	0.159546	0.64527	0.983158	0.197766	0.0715239	0.0168418	0.00451995	0.840454	0.802234	0.99548	3.08051	3.07697	3.07696	3.06986	0.85739	0.358367	0.417138	0.186099	0.641633	0.499839	0.259955	0.582862	0.500161	0.344413	0.813901	0.740045	0.655587	NA	NA	NA	NA	NA	NA	NA	NA	NA	NA	NA	NA	NA	NA
IFNA10	3446	3.15108	3.16041	3.16924	3.17731	0.722396	0.67218	0.76301	0.848991	0.32782	0.663496	0.789855	0.23699	0.336504	0.624894	0.151009	0.210145	0.375106	3.95528	3.94396	3.9218	3.93225	0.560272	0.270347	0.113425	0.163368	0.729653	0.192048	0.286853	0.886575	0.807952	0.639804	0.836632	0.713147	0.360196	NA	NA	NA	NA	NA	NA	NA	NA	NA	NA	NA	NA	NA	NA
IFNA14	3448	3.03203	3.04438	3.09608	3.04381	0.226245	0.679265	0.977904	0.652781	0.320735	0.974814	0.490764	0.0220957	0.0251863	0.0401778	0.347219	0.509236	0.959822	4.19064	4.24104	4.22802	4.16467	0.0875165	0.963731	0.797553	0.215455	0.0362692	0.38518	0.0102408	0.202447	0.61482	0.0937979	0.784545	0.989759	0.906202	NA	NA	NA	NA	NA	NA	NA	NA	NA	NA	NA	NA	NA	NA
IFNA16	3449	2.74288	2.77749	2.81455	2.77664	0.0582267	0.94799	0.996375	0.919203	0.0520099	0.954119	0.481984	0.00362451	0.0458814	0.0625029	0.0807965	0.518016	0.937497	3.68805	3.70669	3.73453	3.67119	0.156401	0.816832	0.934175	0.262857	0.183168	0.837835	0.0674402	0.065825	0.162165	0.0275902	0.737143	0.93256	0.97241	NA	NA	NA	NA	NA	NA	NA	NA	NA	NA	NA	NA	NA	NA
IFNA17	3451	4.78267	4.80129	4.86773	4.79265	0.194975	0.71041	0.972899	0.605093	0.28959	0.959674	0.386661	0.0271006	0.0403264	0.0352236	0.394907	0.613339	0.964776	5.64617	5.65103	5.62152	5.615	0.736517	0.561084	0.302413	0.225563	0.438916	0.259067	0.178122	0.697587	0.740933	0.450866	0.774437	0.821878	0.549134	NA	NA	NA	NA	NA	NA	NA	NA	NA	NA	NA	NA	NA	NA
IFNA21	3452	3.46803	3.5109	3.55039	3.48	0.090021	0.931056	0.986709	0.64254	0.0689441	0.897776	0.118003	0.0132914	0.102224	0.0220806	0.35746	0.881997	0.977919	4.58723	4.62105	4.60839	4.54792	0.146732	0.881035	0.663089	0.128058	0.118965	0.396257	0.0103961	0.336911	0.603743	0.122724	0.871942	0.989604	0.877276	NA	NA	NA	NA	NA	NA	NA	NA	NA	NA	NA	NA	NA	NA
IFNB1	3456	3.80555	3.84437	3.83798	3.85128	0.611716	0.864858	0.783844	0.868358	0.135142	0.420109	0.58795	0.216156	0.579891	0.637213	0.131642	0.41205	0.362787	3.95436	3.95408	3.98234	3.95079	0.778579	0.494805	0.81447	0.453912	0.505195	0.8388	0.453338	0.18553	0.1612	0.19046	0.546088	0.546662	0.80954	NA	NA	NA	NA	NA	NA	NA	NA	NA	NA	NA	NA	NA	NA
IFNK	56832	2.63049	2.65221	2.66069	2.61086	0.032352	0.906773	0.931748	0.160152	0.0932272	0.690974	0.00635629	0.0682523	0.309026	0.00740453	0.839848	0.993644	0.992595	3.15758	3.12593	3.1366	3.10656	0.00219962	0.00248968	0.0860614	8.67759e-05	0.99751	0.764005	0.0651031	0.913939	0.235995	0.0351307	0.999913	0.934897	0.964869	NA	NA	NA	NA	NA	NA	NA	NA	NA	NA	NA	NA	NA	NA
IFNG	3458	4.51216	3.79267	3.78635	3.9116	9.74603e-25	1.23564e-11	3.78717e-11	5.82617e-08	1	0.44807	0.974465	1	0.55193	0.962986	1	0.0255355	0.0370143	5.01943	4.13602	4.18224	4.21317	3.34701e-31	2.33257e-15	2.81575e-13	2.09229e-12	1	0.815472	0.91902	1	0.184528	0.67642	1	0.08098	0.32358	NA	NA	NA	NA	NA	NA	NA	NA	NA	NA	NA	NA	NA	NA
IFNAR1	3454	5.83339	5.61412	5.84124	5.72107	5.35967e-10	4.30908e-08	0.562292	0.00613028	1	1	0.998185	0.437708	3.42482e-07	0.00667827	0.99387	0.00181532	0.993322	6.13973	6.00688	6.24208	6.12271	2.10995e-08	2.12209e-05	0.985482	0.31959	0.999979	1	0.999687	0.0145182	4.25173e-07	0.00651545	0.68041	0.000313417	0.993485	2.7216	2.67919	2.62533	2.73626	0.0285169	0.130743	0.0169128	0.646237	0.869257	0.0699234	0.976902	0.983087	0.930077	0.998107
IFNAR2	3455	7.09667	7.00544	6.90415	7.17957	3.6932e-08	0.00871414	0.000133855	0.968923	0.991286	0.012895	0.999998	0.999866	0.987105	1	0.0310771	1.66341e-06	1.0284e-07	6.84612	6.82971	6.79625	7.01787	6.26833e-07	0.324138	0.127213	0.999965	0.675862	0.189347	1	0.872787	0.810653	0.999999	3.52269e-05	3.17526e-07	7.942e-07	4.76745	4.61175	4.5859	4.842	1.08067e-10	6.60656e-05	0.00145418	0.955157	0.999934	0.316528	1	0.998546	0.683472	0.999992
IFNGR1	3459	8.02967	7.783	8.00003	7.97899	0.000193205	0.00015601	0.380802	0.257898	0.999844	0.993327	0.998938	0.619198	0.00667287	0.412337	0.742102	0.0010622	0.587663	8.42159	8.136	8.25125	8.30997	4.7249e-05	3.93709e-06	0.0280969	0.0506769	0.999996	0.917212	0.997879	0.971903	0.0827885	0.750425	0.949323	0.00212119	0.249575	3.1273	2.80316	2.74771	2.99335	8.54689e-10	2.42393e-06	2.17678e-06	0.035266	0.999998	0.159427	0.999971	0.999998	0.840573	0.999929
IFNGR2	3460	9.74352	9.72492	9.73603	9.73197	0.98447	0.370564	0.455984	0.433003	0.629436	0.588649	0.555456	0.544016	0.411351	0.474322	0.566997	0.444544	0.525678	9.98411	10.0655	10.0272	10.0941	0.139247	0.961031	0.765551	0.97951	0.0389686	0.232488	0.736457	0.234449	0.767512	0.870919	0.0204903	0.263543	0.129081	4.58835	4.56678	4.45624	4.64009	0.0244016	0.344149	0.0235174	0.814415	0.655851	0.022654	0.95042	0.976483	0.977346	0.998965
CSF1	1435	5.1314	5.02271	5.03943	5.16281	9.28774e-10	8.61548e-06	0.00139095	0.845435	0.999991	0.751809	1	0.998609	0.248191	0.999949	0.154565	6.56819e-08	5.06517e-05	5.66096	5.5592	5.58212	5.66798	9.42448e-09	1.14092e-07	0.000899119	0.60699	1	0.849272	0.999996	0.999101	0.150728	0.99861	0.39301	3.84868e-06	0.00138982	3.46718	3.10602	3.10024	3.41088	4.30329e-12	1.36864e-07	7.75836e-06	0.221411	1	0.464065	1	0.999992	0.535935	0.999988
CSF2	1437	5.3544	5.2769	5.25005	5.28344	0.0305974	0.0188642	0.00507509	0.0494186	0.981136	0.144906	0.588034	0.994925	0.855094	0.841621	0.950581	0.411966	0.158379	5.00382	4.92961	4.9384	4.97374	0.0414075	0.00562827	0.0373379	0.225071	0.994372	0.622987	0.913524	0.962662	0.377013	0.816326	0.774929	0.0864756	0.183674	2.41953	1.85196	1.71266	2.44425	1.79256e-22	1.38903e-07	4.40655e-09	0.58564	1	0.029163	1	1	0.970837	1
CSF3	1440	5.94383	5.87563	5.91664	5.92204	0.554373	0.122608	0.33837	0.390479	0.877392	0.829124	0.775498	0.66163	0.170876	0.531811	0.609521	0.224502	0.468189	5.8519	5.81336	5.8406	5.83715	0.751762	0.152125	0.412656	0.389483	0.847875	0.737098	0.703485	0.587344	0.262902	0.47564	0.610517	0.296515	0.52436	4.28105	4.1925	4.37181	4.31602	0.0381754	0.131682	0.811643	0.661081	0.868318	0.986931	0.988933	0.188357	0.0130686	0.255429
CSF1R	1436	7.43968	6.79761	6.60863	7.92025	6.75962e-56	9.79666e-12	2.11254e-14	0.999999	1	0.00320667	1	1	0.996793	1	1.13775e-06	3.00077e-37	4.65826e-34	7.24669	6.71297	6.66444	7.63053	3.2901e-35	4.63208e-13	5.90623e-09	0.999977	1	0.274746	1	1	0.725254	1	2.32376e-05	2.65097e-22	1.05076e-16	3.21779	3.02653	3.15838	3.42773	4.22854e-12	0.00318557	0.238233	0.996506	0.996814	0.980966	1	0.761767	0.0190342	0.999884
CSF2RA	1438	4.56103	4.32328	4.16072	4.74788	9.29213e-18	0.000356758	1.70861e-07	0.988295	0.999643	0.000453843	1	1	0.999546	1	0.0117051	1.12594e-11	5.49036e-16	4.745	4.5268	4.50534	4.86752	6.35521e-15	1.17982e-06	5.08579e-06	0.982847	0.999999	0.304337	1	0.999995	0.695663	1	0.0171529	3.93215e-11	5.99727e-10	NA	NA	NA	NA	NA	NA	NA	NA	NA	NA	NA	NA	NA	NA
CSF2RB	1439	6.90546	5.66291	5.53584	6.90109	1.70337e-36	1.54376e-16	2.6981e-15	0.488616	1	0.144304	1	1	0.855696	1	0.511384	3.29609e-21	1.53513e-17	6.85528	5.6826	5.72083	6.91459	3.35416e-34	9.20161e-21	1.23774e-10	0.67368	1	0.604475	1	1	0.395525	1	0.32632	5.89942e-22	1.98538e-11	2.41953	1.85196	1.71266	2.44425	1.79256e-22	1.38903e-07	4.40655e-09	0.58564	1	0.029163	1	1	0.970837	1
CSF3R	1441	6.13166	5.55872	5.48144	6.12155	9.72604e-30	6.69034e-12	6.36738e-13	0.459163	1	0.0539802	1	1	0.94602	1	0.540837	1.5069e-12	1.73152e-13	6.2281	5.66769	5.67134	6.10409	8.45661e-22	5.59683e-13	5.57741e-11	0.0767575	1	0.527507	1	1	0.472493	1	0.923243	5.99412e-11	8.71443e-09	3.22381	2.82641	2.9147	3.07176	9.1637e-13	8.04753e-10	5.25185e-05	0.010199	1	0.924094	1	0.999947	0.0759061	0.991119
HLA-A	3105	12.799	12.6694	12.8036	12.8997	3.31498e-05	0.0292326	0.524699	0.925013	0.970767	0.996894	1	0.475301	0.00310569	0.970025	0.0749872	7.81056e-09	0.0299746	12.5811	12.433	12.5131	12.6232	0.00224388	0.00605143	0.212766	0.741298	0.993949	0.863403	0.999952	0.787234	0.136597	0.919222	0.258702	4.77393e-05	0.0807783	9.18256	8.82667	8.83608	8.952	0.0265933	0.0047893	0.0159699	0.0582627	0.995211	0.53174	0.898473	0.98403	0.46826	0.812263
HLA-B	3106	12.491	12.2811	12.444	12.6249	3.87891e-06	0.00977144	0.317907	0.926601	0.990229	0.991937	1	0.682093	0.00806349	0.994088	0.0733991	1.48273e-09	0.00591243	12.4961	12.2028	12.2964	12.3694	0.000791177	0.000109547	0.0360227	0.0779292	0.99989	0.832552	0.989419	0.963977	0.167448	0.754372	0.922071	0.0105811	0.245628	NA	NA	NA	NA	NA	NA	NA	NA	NA	NA	NA	NA	NA	NA
HLA-C	3107	11.9382	11.7087	11.8712	11.9985	1.0717e-07	0.00106002	0.201214	0.788557	0.99894	0.999039	1	0.798786	0.000960801	0.989928	0.211443	9.75322e-11	0.0100724	12.4863	12.185	12.3224	12.3505	8.63706e-07	1.73941e-07	0.0195114	0.0207203	1	0.974225	0.998461	0.980489	0.0257747	0.642358	0.97928	0.00153921	0.357642	7.32437	7.55743	7.12606	7.4866	0.586929	0.763044	0.313296	0.67659	0.236956	0.096997	0.393398	0.686704	0.903003	0.841788
HLA-E	3133	10.7215	10.2162	10.4038	10.5805	8.67917e-19	2.88557e-12	2.62374e-05	0.0227196	1	0.999346	1	0.999974	0.000653517	0.997857	0.97728	5.80868e-13	0.00214318	11.0442	10.5028	10.7812	10.7681	2.81986e-18	4.99863e-18	0.000362476	4.89396e-05	1	0.999947	0.999987	0.999638	5.26118e-05	0.433785	0.999951	1.32766e-05	0.566215	8.48153	8.0538	8.04359	8.31911	1.19271e-13	8.23436e-09	6.20404e-08	0.0140572	1	0.427836	1	1	0.572164	0.999996
HLA-F	3134	9.51675	9.05932	9.30759	9.43538	7.5928e-10	6.50144e-06	0.0333086	0.21899	0.999993	0.999361	1	0.966691	0.00063898	0.941748	0.78101	2.40731e-09	0.0582517	9.75143	9.28115	9.4722	9.52282	5.02547e-09	5.38762e-09	0.00518147	0.00520486	1	0.978738	0.999646	0.994819	0.0212617	0.690991	0.994795	0.00035411	0.309009	6.91174	6.36072	6.3645	6.67221	1.44857e-12	8.04894e-10	4.7475e-08	0.00382727	1	0.519911	0.999999	1	0.480089	0.999914
HLA-G	3135	10.6251	10.3812	10.5491	10.6551	5.85342e-07	0.000498087	0.177613	0.653902	0.999502	0.998007	1	0.822387	0.00199341	0.956855	0.346098	1.51586e-08	0.0431452	10.8812	10.4353	10.6427	10.6637	1.01042e-07	2.70945e-08	0.0180437	0.00972742	1	0.980254	0.998594	0.981956	0.0197458	0.575727	0.990273	0.00140642	0.424273	2.55996	2.44666	2.61361	2.50209	0.00029139	0.00811036	0.82812	0.126428	0.99189	0.999947	0.954531	0.17188	5.2968e-05	0.00818332
B2M	567	10.2581	10.0191	10.1146	10.1732	3.80194e-16	2.49919e-10	0.000453975	0.0122371	1	0.998759	1	0.999546	0.00124124	0.95966	0.987763	1.97034e-10	0.0403398	10.7695	10.4415	10.5417	10.5933	4.74318e-13	8.88811e-12	0.000631976	0.00020884	1	0.950331	0.999982	0.999368	0.0496688	0.79323	0.999791	1.8253e-05	0.20677	5.48995	4.84992	5.04414	5.19238	5.60129e-27	1.17072e-15	8.62601e-08	4.13619e-05	1	0.999565	1	1	0.000435128	0.990825
[truncated: 3 more columns]
